# Supplementary material for: TrAnnoScope: A Modular Snakemake Pipeline for Comprehensive Full-Length Transcriptome Analysis and Functional Annotation
Source: Preprints.org preprint supplement (doi:10.20944/preprints202411.0489.v1), 2024-11-07
Supplement: Supplementary file 1 [file supplementary]

## Sheet: unmapped annotations
transcript_id	#gene_id	sprot_Top_BLASTX_hit	infernal	prot_id	prot_coords	sprot_Top_BLASTP_hit	NR_BLASTX	NR_BLASTP	Pfam	SignalP	TmHMM	eggnog	Kegg	gene_ontology_BLASTX	gene_ontology_BLASTP	gene_ontology_Pfam	EggNM.seed_ortholog	EggNM.evalue	EggNM.score	EggNM.eggNOG_OGs	EggNM.max_annot_lvl	EggNM.COG_category	EggNM.Description	EggNM.Preferred_name	EggNM.GOs	EggNM.EC	EggNM.KEGG_ko	EggNM.KEGG_Pathway	EggNM.KEGG_Module	EggNM.KEGG_Reaction	EggNM.KEGG_rclass	EggNM.BRITE	EggNM.KEGG_TC	EggNM.CAZy	EggNM.BiGG_Reaction	EggNM.PFAMs	transcript	peptide	NT_BLASTN
NonamEVm000061t1	NonamEVm000061	.	.	NonamEVm000061t1.p1	1-6897[+]	.	.	.	.	.	TMRs:PredHel=64^Topology=o15-37i50-72o87-109i122-144o159-181i194-216o231-253i266-288o303-325i338-360o375-397i410-432o447-469i482-504o519-541i554-576o591-613i626-648o663-685i698-720o735-757i770-792o807-829i842-864o879-901i914-936o951-973i986-1008o1023-1045i1058-1080o1095-1117i1130-1152o1167-1189i1202-1224o1239-1261i1274-1296o1311-1333i1346-1368o1383-1405i1418-1440o1455-1477i1490-1512o1527-1549i156…	.	.	.	.	.	.	.	.	.	.	.	.	.	.	.	.	.	.	.	.	.	.	.	.	.	.	.	.
NonamEVm000126t1	NonamEVm000126	.	.	NonamEVm000126t1.p1	1-6063[+]	.	.	.	.	.	.	.	.	.	.	.	.	.	.	.	.	.	.	.	.	.	.	.	.	.	.	.	.	.	.	.	.	.	.
NonamEVm000167t1	NonamEVm000167	.	.	NonamEVm000167t1.p1	1-5763[+]	.	.	.	.	.	.	.	.	.	.	.	.	.	.	.	.	.	.	.	.	.	.	.	.	.	.	.	.	.	.	.	.	.	.
NonamEVm000168t1	NonamEVm000168	.	.	NonamEVm000168t1.p1	1-5763[+]	.	.	.	.	.	.	.	.	.	.	.	.	.	.	.	.	.	.	.	.	.	.	.	.	.	.	.	.	.	.	.	.	.	.
NonamEVm000226t1	NonamEVm000226	.	.	NonamEVm000226t1.p1	1-5415[+]	.	.	.	.	.	TMRs:PredHel=72^Topology=i2-24o28-50i52-74o78-100i102-124o128-150i152-174o178-200i202-224o228-250i252-274o278-300i302-324o328-350i352-374o378-400i402-424o428-450i452-474o478-500i502-524o528-550i552-574o578-600i602-624o628-650i652-674o678-700i702-724o728-750i752-774o778-800i802-824o828-850i852-874o878-900i905-927o931-953i955-977o981-1003i1005-1027o1031-1053i1055-1077o1081-1103i1105-1127o1131-1153i…	.	.	.	.	.	.	.	.	.	.	.	.	.	.	.	.	.	.	.	.	.	.	.	.	.	.	.	.
NonamEVm000292t1	NonamEVm000292	.	.	NonamEVm000292t1.p1	1-5094[+]	.	.	.	.	.	TMRs:PredHel=61^Topology=o4-26i33-55o59-81i88-110o114-136i143-165o175-197i204-226o236-258i265-287o297-319i326-348o352-374i381-403o407-429i436-458o462-484i491-513o517-539i546-568o572-594i601-623o627-649i656-678o682-704i711-733o737-759i766-788o793-815i822-844o849-871i878-900o905-927i934-956o960-982i989-1011o1015-1037i1044-1066o1070-1092i1099-1121o1125-1147i1154-1176o1180-1202i1209-1231o1235-1257i12…	.	.	.	.	.	.	.	.	.	.	.	.	.	.	.	.	.	.	.	.	.	.	.	.	.	.	.	.
NonamEVm000312t1	NonamEVm000312	.	.	NonamEVm000312t1.p1	1-5007[+]	.	.	.	.	.	TMRs:PredHel=61^Topology=o4-26i33-55o59-81i88-110o114-136i143-165o169-191i198-220o224-246i253-275o279-301i308-330o334-356i363-385o389-411i418-440o444-466i473-495o499-521i528-550o554-576i583-605o609-631i638-660o664-686i693-715o719-741i748-770o774-796i803-825o829-851i858-880o884-906i913-935o939-961i968-990o994-1016i1023-1045o1049-1071i1078-1100o1104-1126i1133-1155o1159-1181i1188-1210o1214-1236i1243…	.	.	.	.	.	.	.	.	.	.	.	.	.	.	.	.	.	.	.	.	.	.	.	.	.	.	.	.
NonamEVm000386t1	NonamEVm000386	.	.	NonamEVm000386t1.p1	1-4671[+]	.	.	.	.	.	TMRs:PredHel=62^Topology=i5-27o31-53i55-77o81-103i105-127o131-153i155-177o181-203i205-227o231-253i255-277o281-303i305-327o331-353i355-377o381-403i405-427o431-453i455-477o481-503i505-527o531-553i555-577o581-603i605-627o631-653i655-677o681-703i705-727o731-753i755-777o781-803i805-827o831-853i855-877o881-903i905-927o931-953i955-977o981-1003i1005-1027o1031-1053i1055-1077o1081-1103i1105-1127o1131-1153i…	.	.	.	.	.	.	.	.	.	.	.	.	.	.	.	.	.	.	.	.	.	.	.	.	.	.	.	.
NonamEVm000422t1	NonamEVm000422	.	.	NonamEVm000422t1.p1	1-4554[+]	.	.	.	.	.	.	.	.	.	.	.	.	.	.	.	.	.	.	.	.	.	.	.	.	.	.	.	.	.	.	.	.	.	.
NonamEVm000443t1	NonamEVm000443	BAZ1B_HUMAN^BAZ1B_HUMAN^Q:107-4573,H:1-1483^76.9%ID^E:0^RecName: Full=Tyrosine-protein kinase BAZ1B;^Eukaryota; Metazoa; Chordata; Craniata; Vertebrata; Euteleostomi; Mammalia; Eutheria; Euarchontoglires; Primates; Haplorrhini; Catarrhini; Hominidae; Homo	.	NonamEVm000443t1.p1	107-4576[+]	BAZ1B_HUMAN^BAZ1B_HUMAN^Q:1-1489,H:1-1483^76.9%ID^E:0^RecName: Full=Tyrosine-protein kinase BAZ1B;^Eukaryota; Metazoa; Chordata; Craniata; Vertebrata; Euteleostomi; Mammalia; Eutheria; Euarchontoglires; Primates; Haplorrhini; Catarrhini; Hominidae; Homo	RLV97904.1^RLV97904.1^Q:107-4573,H:1-1489^98.7%ID^E:0^.^.	RLV97904.1^RLV97904.1^Q:1-1489,H:1-1489^98.7%ID^E:0^.^.	PF10537.14^WAC_Acf1_DNA_bd^NULL^23-121^E:6.9e-26`PF15612.11^WHIM1^NULL^725-759^E:5.6e-07`PF15613.11^WSD^NULL^897-1025^E:8.2e-21`PF00628.34^PHD^NULL^1188-1232^E:2.2e-13`PF00439.30^Bromodomain^NULL^1351-1430^E:2.4e-23	.	.	.	KEGG:hsa:9031	GO:0110016^cellular_component^B-WICH complex`GO:0000793^cellular_component^condensed chromosome`GO:0005730^cellular_component^nucleolus`GO:0005654^cellular_component^nucleoplasm`GO:0005634^cellular_component^nucleus`GO:0005721^cellular_component^pericentric heterochromatin`GO:0090535^cellular_component^WICH complex`GO:0005524^molecular_function^ATP binding`GO:0042393^molecular_function^histone bi…	GO:0110016^cellular_component^B-WICH complex`GO:0000793^cellular_component^condensed chromosome`GO:0005730^cellular_component^nucleolus`GO:0005654^cellular_component^nucleoplasm`GO:0005634^cellular_component^nucleus`GO:0005721^cellular_component^pericentric heterochromatin`GO:0090535^cellular_component^WICH complex`GO:0005524^molecular_function^ATP binding`GO:0042393^molecular_function^histone bi…	GO:0005515^molecular_function^protein binding	181119.XP_005525957.1	0.0	2536.0	COG5076@1|root,KOG1245@2759|Eukaryota,38CWU@33154|Opisthokonta,3BB9F@33208|Metazoa,3CUUU@33213|Bilateria,47ZWJ@7711|Chordata,48VP3@7742|Vertebrata,4GMQ5@8782|Aves	33208|Metazoa	B	Bromodomain adjacent to zinc finger domain 1B	BAZ1B	GO:0000775,GO:0000785,GO:0000792,GO:0000793,GO:0003674,GO:0003824,GO:0004672,GO:0004713,GO:0005488,GO:0005515,GO:0005575,GO:0005622,GO:0005623,GO:0005634,GO:0005654,GO:0005694,GO:0005721,GO:0006325,GO:0006333,GO:0006338,GO:0006355,GO:0006357,GO:0006464,GO:0006468,GO:0006793,GO:0006796,GO:0006807,GO:0006950,GO:0006974,GO:0006996,GO:0008150,GO:0008152,GO:0008270,GO:0009889,GO:0009893,GO:0009987,GO:…	.	ko:K11658	.	.	.	.	ko00000,ko03036	.	.	.	Bromodomain,PHD,WAC_Acf1_DNA_bd,WHIM1,WSD	.	.	gi|1210004222|ref|XM_021540375.1|;97.715;6257;123;11;1;6251;18;6260;0;10744;PREDICTED: Lonchura striata domestica bromodomain adjacent to zinc finger domain 1B (BAZ1B), mRNA
NonamEVm000443t2	NonamEVm000443	BAZ1B_HUMAN^BAZ1B_HUMAN^Q:124-4590,H:1-1483^77%ID^E:0^RecName: Full=Tyrosine-protein kinase BAZ1B;^Eukaryota; Metazoa; Chordata; Craniata; Vertebrata; Euteleostomi; Mammalia; Eutheria; Euarchontoglires; Primates; Haplorrhini; Catarrhini; Hominidae; Homo	.	NonamEVm000443t2.p1	124-4593[+]	BAZ1B_HUMAN^BAZ1B_HUMAN^Q:1-1489,H:1-1483^77%ID^E:0^RecName: Full=Tyrosine-protein kinase BAZ1B;^Eukaryota; Metazoa; Chordata; Craniata; Vertebrata; Euteleostomi; Mammalia; Eutheria; Euarchontoglires; Primates; Haplorrhini; Catarrhini; Hominidae; Homo	RLV97904.1^RLV97904.1^Q:124-4590,H:1-1489^98.7%ID^E:0^.^.	RLV97904.1^RLV97904.1^Q:1-1489,H:1-1489^98.7%ID^E:0^.^.	PF10537.14^WAC_Acf1_DNA_bd^NULL^23-121^E:6.9e-26`PF15612.11^WHIM1^NULL^725-759^E:5.6e-07`PF15613.11^WSD^NULL^897-1025^E:8.2e-21`PF00628.34^PHD^NULL^1188-1232^E:2.2e-13`PF00439.30^Bromodomain^NULL^1351-1430^E:2.4e-23	.	.	.	KEGG:hsa:9031	GO:0110016^cellular_component^B-WICH complex`GO:0000793^cellular_component^condensed chromosome`GO:0005730^cellular_component^nucleolus`GO:0005654^cellular_component^nucleoplasm`GO:0005634^cellular_component^nucleus`GO:0005721^cellular_component^pericentric heterochromatin`GO:0090535^cellular_component^WICH complex`GO:0005524^molecular_function^ATP binding`GO:0042393^molecular_function^histone bi…	GO:0110016^cellular_component^B-WICH complex`GO:0000793^cellular_component^condensed chromosome`GO:0005730^cellular_component^nucleolus`GO:0005654^cellular_component^nucleoplasm`GO:0005634^cellular_component^nucleus`GO:0005721^cellular_component^pericentric heterochromatin`GO:0090535^cellular_component^WICH complex`GO:0005524^molecular_function^ATP binding`GO:0042393^molecular_function^histone bi…	GO:0005515^molecular_function^protein binding	181119.XP_005525957.1	0.0	2538.0	COG5076@1|root,KOG1245@2759|Eukaryota,38CWU@33154|Opisthokonta,3BB9F@33208|Metazoa,3CUUU@33213|Bilateria,47ZWJ@7711|Chordata,48VP3@7742|Vertebrata,4GMQ5@8782|Aves	33208|Metazoa	B	Bromodomain adjacent to zinc finger domain 1B	BAZ1B	GO:0000775,GO:0000785,GO:0000792,GO:0000793,GO:0003674,GO:0003824,GO:0004672,GO:0004713,GO:0005488,GO:0005515,GO:0005575,GO:0005622,GO:0005623,GO:0005634,GO:0005654,GO:0005694,GO:0005721,GO:0006325,GO:0006333,GO:0006338,GO:0006355,GO:0006357,GO:0006464,GO:0006468,GO:0006793,GO:0006796,GO:0006807,GO:0006950,GO:0006974,GO:0006996,GO:0008150,GO:0008152,GO:0008270,GO:0009889,GO:0009893,GO:0009987,GO:…	.	ko:K11658	.	.	.	.	ko00000,ko03036	.	.	.	Bromodomain,PHD,WAC_Acf1_DNA_bd,WHIM1,WSD	.	.	gi|1210004222|ref|XM_021540375.1|;97.736;6273;123;10;2;6269;1;6259;0;10780;PREDICTED: Lonchura striata domestica bromodomain adjacent to zinc finger domain 1B (BAZ1B), mRNA
NonamEVm000443t3	NonamEVm000443	BAZ1B_HUMAN^BAZ1B_HUMAN^Q:213-2393,H:763-1483^74.5%ID^E:1.07999998235249e-316^RecName: Full=Tyrosine-protein kinase BAZ1B;^Eukaryota; Metazoa; Chordata; Craniata; Vertebrata; Euteleostomi; Mammalia; Eutheria; Euarchontoglires; Primates; Haplorrhini; Catarrhini; Hominidae; Homo	.	NonamEVm000443t3.p1	123-2396[+]	BAZ1B_HUMAN^BAZ1B_HUMAN^Q:31-757,H:763-1483^74.5%ID^E:0^RecName: Full=Tyrosine-protein kinase BAZ1B;^Eukaryota; Metazoa; Chordata; Craniata; Vertebrata; Euteleostomi; Mammalia; Eutheria; Euarchontoglires; Primates; Haplorrhini; Catarrhini; Hominidae; Homo	RLV97904.1^RLV97904.1^Q:255-2393,H:777-1489^98%ID^E:0^.^.	RLV97904.1^RLV97904.1^Q:45-757,H:777-1489^98%ID^E:0^.^.	PF15613.11^WSD^NULL^165-293^E:3.1e-21`PF00628.34^PHD^NULL^456-500^E:1e-13`PF00439.30^Bromodomain^NULL^619-698^E:1e-23	.	.	.	KEGG:hsa:9031	GO:0110016^cellular_component^B-WICH complex`GO:0000793^cellular_component^condensed chromosome`GO:0005730^cellular_component^nucleolus`GO:0005654^cellular_component^nucleoplasm`GO:0005634^cellular_component^nucleus`GO:0005721^cellular_component^pericentric heterochromatin`GO:0090535^cellular_component^WICH complex`GO:0005524^molecular_function^ATP binding`GO:0042393^molecular_function^histone bi…	GO:0110016^cellular_component^B-WICH complex`GO:0000793^cellular_component^condensed chromosome`GO:0005730^cellular_component^nucleolus`GO:0005654^cellular_component^nucleoplasm`GO:0005634^cellular_component^nucleus`GO:0005721^cellular_component^pericentric heterochromatin`GO:0090535^cellular_component^WICH complex`GO:0005524^molecular_function^ATP binding`GO:0042393^molecular_function^histone bi…	GO:0005515^molecular_function^protein binding	181119.XP_005525957.1	0.0	1231.0	COG5076@1|root,KOG1245@2759|Eukaryota,38CWU@33154|Opisthokonta,3BB9F@33208|Metazoa,3CUUU@33213|Bilateria,47ZWJ@7711|Chordata,48VP3@7742|Vertebrata,4GMQ5@8782|Aves	33208|Metazoa	B	Bromodomain adjacent to zinc finger domain 1B	BAZ1B	GO:0000775,GO:0000785,GO:0000792,GO:0000793,GO:0003674,GO:0003824,GO:0004672,GO:0004713,GO:0005488,GO:0005515,GO:0005575,GO:0005622,GO:0005623,GO:0005634,GO:0005654,GO:0005694,GO:0005721,GO:0006325,GO:0006333,GO:0006338,GO:0006355,GO:0006357,GO:0006464,GO:0006468,GO:0006793,GO:0006796,GO:0006807,GO:0006950,GO:0006974,GO:0006996,GO:0008150,GO:0008152,GO:0008270,GO:0009889,GO:0009893,GO:0009987,GO:…	.	ko:K11658	.	.	.	.	ko00000,ko03036	.	.	.	Bromodomain,PHD,WAC_Acf1_DNA_bd,WHIM1,WSD	.	.	gi|1210004222|ref|XM_021540375.1|;97.306;3823;86;8;254;4072;2451;6260;0;6473;PREDICTED: Lonchura striata domestica bromodomain adjacent to zinc finger domain 1B (BAZ1B), mRNA
NonamEVm000447t1	NonamEVm000447	RIMB1_MOUSE^RIMB1_MOUSE^Q:1-4671,H:443-1818^42.8%ID^E:3.71e-285^RecName: Full=Peripheral-type benzodiazepine receptor-associated protein 1;^Eukaryota; Metazoa; Chordata; Craniata; Vertebrata; Euteleostomi; Mammalia; Eutheria; Euarchontoglires; Glires; Rodentia; Myomorpha; Muroidea; Muridae; Murinae; Mus; Mus	.	NonamEVm000447t1.p1	505-4968[+]	RIMB1_RAT^RIMB1_RAT^Q:3-1389,H:612-1819^41.5%ID^E:7.57e-255^RecName: Full=Peripheral-type benzodiazepine receptor-associated protein 1;^Eukaryota; Metazoa; Chordata; Craniata; Vertebrata; Euteleostomi; Mammalia; Eutheria; Euarchontoglires; Glires; Rodentia; Myomorpha; Muroidea; Muridae; Murinae; Rattus	XP_036251000.1^XP_036251000.1^Q:1-4965,H:459-2113^93.6%ID^E:0^.^.	XP_036251000.1^XP_036251000.1^Q:2-1487,H:628-2113^93.3%ID^E:0^.^.	PF07653.22^SH3_2^NULL^55-102^E:8e-11`PF14604.11^SH3_9^NULL^61-102^E:2.6e-11`PF00041.26^fn3^NULL^173-250^E:1.8e-06`PF07653.22^SH3_2^NULL^1193-1254^E:4.6e-13`PF00018.33^SH3_1^NULL^1195-1248^E:4.4e-07`PF07653.22^SH3_2^NULL^1331-1389^E:3.2e-14`PF14604.11^SH3_9^NULL^1333-1389^E:7.7e-12	.	.	.	KEGG:mmu:207777	GO:0044305^cellular_component^calyx of Held`GO:0098978^cellular_component^glutamatergic synapse`GO:0005739^cellular_component^mitochondrion`GO:0030156^molecular_function^benzodiazepine receptor binding`GO:0099626^molecular_function^voltage-gated calcium channel activity involved in regulation of presynaptic cytosolic calcium levels`GO:0046928^biological_process^regulation of neurotransmitter secr…	GO:0044305^cellular_component^calyx of Held`GO:0005737^cellular_component^cytoplasm`GO:0098978^cellular_component^glutamatergic synapse`GO:0005739^cellular_component^mitochondrion`GO:0030156^molecular_function^benzodiazepine receptor binding`GO:0099626^molecular_function^voltage-gated calcium channel activity involved in regulation of presynaptic cytosolic calcium levels`GO:0070588^biological_pro…	GO:0005515^molecular_function^protein binding	181119.XP_005525953.1	0.0	2477.0	KOG3632@1|root,KOG3632@2759|Eukaryota,38CCB@33154|Opisthokonta,3BEY5@33208|Metazoa,3CSJI@33213|Bilateria,481M5@7711|Chordata,497H8@7742|Vertebrata,4GU5W@8782|Aves	33208|Metazoa	T	Peripheral-type benzodiazepine receptor-associated protein	BZRAP1	GO:0003674,GO:0005102,GO:0005488,GO:0005515,GO:0005575,GO:0005622,GO:0005623,GO:0005737,GO:0005739,GO:0005829,GO:0005856,GO:0005938,GO:0006629,GO:0006694,GO:0006700,GO:0006996,GO:0007010,GO:0007154,GO:0007267,GO:0007268,GO:0007274,GO:0008150,GO:0008152,GO:0008202,GO:0008207,GO:0008610,GO:0009058,GO:0009987,GO:0010817,GO:0016043,GO:0023052,GO:0030156,GO:0030863,GO:0030865,GO:0034754,GO:0042445,GO:…	.	ko:K17591,ko:K19922	.	.	.	.	ko00000,ko01009,ko04131	.	.	.	SH3_2,SH3_9,fn3	.	.	gi|2451457607|ref|XM_053960947.1|;95.635;6048;234;13;1;6029;711;6747;0;9679;PREDICTED: Vidua chalybeata TSPO associated protein 1 (TSPOAP1), transcript variant X10, mRNA
NonamEVm000447t2	NonamEVm000447	RIMB1_MOUSE^RIMB1_MOUSE^Q:120-4034,H:320-1818^43.3%ID^E:1.03e-275^RecName: Full=Peripheral-type benzodiazepine receptor-associated protein 1;^Eukaryota; Metazoa; Chordata; Craniata; Vertebrata; Euteleostomi; Mammalia; Eutheria; Euarchontoglires; Glires; Rodentia; Myomorpha; Muroidea; Muridae; Murinae; Mus; Mus	.	NonamEVm000447t2.p1	471-4331[+]	RIMB1_MOUSE^RIMB1_MOUSE^Q:1-1188,H:437-1818^41.9%ID^E:4.55e-256^RecName: Full=Peripheral-type benzodiazepine receptor-associated protein 1;^Eukaryota; Metazoa; Chordata; Craniata; Vertebrata; Euteleostomi; Mammalia; Eutheria; Euarchontoglires; Glires; Rodentia; Myomorpha; Muroidea; Muridae; Murinae; Mus; Mus	XP_039588817.1^XP_039588817.1^Q:54-4328,H:314-1737^94.3%ID^E:0^.^.	XP_039588817.1^XP_039588817.1^Q:1-1286,H:453-1737^94.1%ID^E:0^.^.	PF07653.22^SH3_2^NULL^229-276^E:6.8e-11`PF14604.11^SH3_9^NULL^235-276^E:2.2e-11`PF00041.26^fn3^NULL^347-424^E:1.5e-06`PF07653.22^SH3_2^NULL^993-1054^E:3.9e-13`PF00018.33^SH3_1^NULL^995-1048^E:3.7e-07`PF07653.22^SH3_2^NULL^1130-1188^E:2.7e-14`PF14604.11^SH3_9^NULL^1132-1188^E:6.5e-12	.	.	.	KEGG:mmu:207777	GO:0044305^cellular_component^calyx of Held`GO:0098978^cellular_component^glutamatergic synapse`GO:0005739^cellular_component^mitochondrion`GO:0030156^molecular_function^benzodiazepine receptor binding`GO:0099626^molecular_function^voltage-gated calcium channel activity involved in regulation of presynaptic cytosolic calcium levels`GO:0046928^biological_process^regulation of neurotransmitter secr…	GO:0044305^cellular_component^calyx of Held`GO:0098978^cellular_component^glutamatergic synapse`GO:0005739^cellular_component^mitochondrion`GO:0030156^molecular_function^benzodiazepine receptor binding`GO:0099626^molecular_function^voltage-gated calcium channel activity involved in regulation of presynaptic cytosolic calcium levels`GO:0046928^biological_process^regulation of neurotransmitter secr…	GO:0005515^molecular_function^protein binding	181119.XP_005525953.1	0.0	1966.0	KOG3632@1|root,KOG3632@2759|Eukaryota,38CCB@33154|Opisthokonta,3BEY5@33208|Metazoa,3CSJI@33213|Bilateria,481M5@7711|Chordata,497H8@7742|Vertebrata,4GU5W@8782|Aves	33208|Metazoa	T	Peripheral-type benzodiazepine receptor-associated protein	BZRAP1	GO:0003674,GO:0005102,GO:0005488,GO:0005515,GO:0005575,GO:0005622,GO:0005623,GO:0005737,GO:0005739,GO:0005829,GO:0005856,GO:0005938,GO:0006629,GO:0006694,GO:0006700,GO:0006996,GO:0007010,GO:0007154,GO:0007267,GO:0007268,GO:0007274,GO:0008150,GO:0008152,GO:0008202,GO:0008207,GO:0008610,GO:0009058,GO:0009987,GO:0010817,GO:0016043,GO:0023052,GO:0030156,GO:0030863,GO:0030865,GO:0034754,GO:0042445,GO:…	.	ko:K17591,ko:K19922	.	.	.	.	ko00000,ko01009,ko04131	.	.	.	SH3_2,SH3_9,fn3	.	.	gi|2451457605|ref|XM_053960946.1|;95.743;5333;200;13;61;5377;1147;6468;0;8565;PREDICTED: Vidua chalybeata TSPO associated protein 1 (TSPOAP1), transcript variant X9, mRNA
NonamEVm000447t3	NonamEVm000447	RIMB1_MOUSE^RIMB1_MOUSE^Q:71-3661,H:320-1708^41.7%ID^E:4.1e-232^RecName: Full=Peripheral-type benzodiazepine receptor-associated protein 1;^Eukaryota; Metazoa; Chordata; Craniata; Vertebrata; Euteleostomi; Mammalia; Eutheria; Euarchontoglires; Glires; Rodentia; Myomorpha; Muroidea; Muridae; Murinae; Mus; Mus	.	NonamEVm000447t3.p1	422-3877[+]	RIMB1_MOUSE^RIMB1_MOUSE^Q:1-1080,H:437-1708^40.1%ID^E:1.37e-213^RecName: Full=Peripheral-type benzodiazepine receptor-associated protein 1;^Eukaryota; Metazoa; Chordata; Craniata; Vertebrata; Euteleostomi; Mammalia; Eutheria; Euarchontoglires; Glires; Rodentia; Myomorpha; Muroidea; Muridae; Murinae; Mus; Mus	XP_039588817.1^XP_039588817.1^Q:8-3667,H:315-1532^94.3%ID^E:0^.^.	XP_039588817.1^XP_039588817.1^Q:1-1082,H:453-1532^94.1%ID^E:0^.^.	PF07653.22^SH3_2^NULL^229-276^E:5.9e-11`PF14604.11^SH3_9^NULL^235-276^E:1.9e-11`PF00041.26^fn3^NULL^347-424^E:1.3e-06`PF07653.22^SH3_2^NULL^993-1054^E:3.4e-13`PF00018.33^SH3_1^NULL^995-1048^E:3.2e-07	.	.	.	KEGG:mmu:207777	GO:0044305^cellular_component^calyx of Held`GO:0098978^cellular_component^glutamatergic synapse`GO:0005739^cellular_component^mitochondrion`GO:0030156^molecular_function^benzodiazepine receptor binding`GO:0099626^molecular_function^voltage-gated calcium channel activity involved in regulation of presynaptic cytosolic calcium levels`GO:0046928^biological_process^regulation of neurotransmitter secr…	GO:0044305^cellular_component^calyx of Held`GO:0098978^cellular_component^glutamatergic synapse`GO:0005739^cellular_component^mitochondrion`GO:0030156^molecular_function^benzodiazepine receptor binding`GO:0099626^molecular_function^voltage-gated calcium channel activity involved in regulation of presynaptic cytosolic calcium levels`GO:0046928^biological_process^regulation of neurotransmitter secr…	GO:0005515^molecular_function^protein binding	181119.XP_005525953.1	0.0	1716.0	KOG3632@1|root,KOG3632@2759|Eukaryota,38CCB@33154|Opisthokonta,3BEY5@33208|Metazoa,3CSJI@33213|Bilateria,481M5@7711|Chordata,497H8@7742|Vertebrata,4GU5W@8782|Aves	33208|Metazoa	T	Peripheral-type benzodiazepine receptor-associated protein	BZRAP1	GO:0003674,GO:0005102,GO:0005488,GO:0005515,GO:0005575,GO:0005622,GO:0005623,GO:0005737,GO:0005739,GO:0005829,GO:0005856,GO:0005938,GO:0006629,GO:0006694,GO:0006700,GO:0006996,GO:0007010,GO:0007154,GO:0007267,GO:0007268,GO:0007274,GO:0008150,GO:0008152,GO:0008202,GO:0008207,GO:0008610,GO:0009058,GO:0009987,GO:0010817,GO:0016043,GO:0023052,GO:0030156,GO:0030863,GO:0030865,GO:0034754,GO:0042445,GO:…	.	ko:K17591,ko:K19922	.	.	.	.	ko00000,ko01009,ko04131	.	.	.	SH3_2,SH3_9,fn3	.	.	gi|2451485769|ref|XM_053995295.1|;97.067;3648;107;0;12;3659;1147;4794;0;6144;PREDICTED: Vidua macroura TSPO associated protein 1 (TSPOAP1), transcript variant X9, mRNA
NonamEVm000447t4	NonamEVm000447	RIMB1_MOUSE^RIMB1_MOUSE^Q:69-3914,H:320-1818^41.9%ID^E:1.14e-253^RecName: Full=Peripheral-type benzodiazepine receptor-associated protein 1;^Eukaryota; Metazoa; Chordata; Craniata; Vertebrata; Euteleostomi; Mammalia; Eutheria; Euarchontoglires; Glires; Rodentia; Myomorpha; Muroidea; Muridae; Murinae; Mus; Mus	.	NonamEVm000447t4.p1	420-4211[+]	RIMB1_MOUSE^RIMB1_MOUSE^Q:1-1165,H:437-1818^40.4%ID^E:7.8e-234^RecName: Full=Peripheral-type benzodiazepine receptor-associated protein 1;^Eukaryota; Metazoa; Chordata; Craniata; Vertebrata; Euteleostomi; Mammalia; Eutheria; Euarchontoglires; Glires; Rodentia; Myomorpha; Muroidea; Muridae; Murinae; Mus; Mus	XP_039588817.1^XP_039588817.1^Q:6-4208,H:315-1737^92.8%ID^E:0^.^.	XP_039588817.1^XP_039588817.1^Q:1-1263,H:453-1737^92.4%ID^E:0^.^.	PF07653.22^SH3_2^NULL^229-276^E:6.6e-11`PF14604.11^SH3_9^NULL^235-276^E:2.1e-11`PF00041.26^fn3^NULL^347-424^E:1.5e-06`PF07653.22^SH3_2^NULL^993-1054^E:3.8e-13`PF00018.33^SH3_1^NULL^995-1048^E:3.6e-07	.	.	.	KEGG:mmu:207777	GO:0044305^cellular_component^calyx of Held`GO:0098978^cellular_component^glutamatergic synapse`GO:0005739^cellular_component^mitochondrion`GO:0030156^molecular_function^benzodiazepine receptor binding`GO:0099626^molecular_function^voltage-gated calcium channel activity involved in regulation of presynaptic cytosolic calcium levels`GO:0046928^biological_process^regulation of neurotransmitter secr…	GO:0044305^cellular_component^calyx of Held`GO:0098978^cellular_component^glutamatergic synapse`GO:0005739^cellular_component^mitochondrion`GO:0030156^molecular_function^benzodiazepine receptor binding`GO:0099626^molecular_function^voltage-gated calcium channel activity involved in regulation of presynaptic cytosolic calcium levels`GO:0046928^biological_process^regulation of neurotransmitter secr…	GO:0005515^molecular_function^protein binding	181119.XP_005525953.1	0.0	1898.0	KOG3632@1|root,KOG3632@2759|Eukaryota,38CCB@33154|Opisthokonta,3BEY5@33208|Metazoa,3CSJI@33213|Bilateria,481M5@7711|Chordata,497H8@7742|Vertebrata,4GU5W@8782|Aves	33208|Metazoa	T	Peripheral-type benzodiazepine receptor-associated protein	BZRAP1	GO:0003674,GO:0005102,GO:0005488,GO:0005515,GO:0005575,GO:0005622,GO:0005623,GO:0005737,GO:0005739,GO:0005829,GO:0005856,GO:0005938,GO:0006629,GO:0006694,GO:0006700,GO:0006996,GO:0007010,GO:0007154,GO:0007267,GO:0007268,GO:0007274,GO:0008150,GO:0008152,GO:0008202,GO:0008207,GO:0008610,GO:0009058,GO:0009987,GO:0010817,GO:0016043,GO:0023052,GO:0030156,GO:0030863,GO:0030865,GO:0034754,GO:0042445,GO:…	.	ko:K17591,ko:K19922	.	.	.	.	ko00000,ko01009,ko04131	.	.	.	SH3_2,SH3_9,fn3	.	.	gi|2451485769|ref|XM_053995295.1|;96.967;3858;117;0;10;3867;1147;5004;0;6477;PREDICTED: Vidua macroura TSPO associated protein 1 (TSPOAP1), transcript variant X9, mRNA
NonamEVm000447t5	NonamEVm000447	RIMB1_RAT^RIMB1_RAT^Q:274-1701,H:1410-1846^41.9%ID^E:7.91e-76^RecName: Full=Peripheral-type benzodiazepine receptor-associated protein 1;^Eukaryota; Metazoa; Chordata; Craniata; Vertebrata; Euteleostomi; Mammalia; Eutheria; Euarchontoglires; Glires; Rodentia; Myomorpha; Muroidea; Muridae; Murinae; Rattus	.	NonamEVm000447t5.p1	1-1704[+]	RIMB1_RAT^RIMB1_RAT^Q:92-567,H:1410-1846^41.9%ID^E:1.83e-79^RecName: Full=Peripheral-type benzodiazepine receptor-associated protein 1;^Eukaryota; Metazoa; Chordata; Craniata; Vertebrata; Euteleostomi; Mammalia; Eutheria; Euarchontoglires; Glires; Rodentia; Myomorpha; Muroidea; Muridae; Murinae; Rattus	XP_036251003.1^XP_036251003.1^Q:1-1950,H:1457-2088^90.5%ID^E:0^.^.	XP_021396058.1^XP_021396058.1^Q:1-567,H:1456-2024^96.1%ID^E:0^.^.	PF07653.22^SH3_2^NULL^361-422^E:1.4e-13`PF00018.33^SH3_1^NULL^363-416^E:1.4e-07`PF07653.22^SH3_2^NULL^474-532^E:9.6e-15`PF14604.11^SH3_9^NULL^476-532^E:2.4e-12	.	.	.	.	GO:0044305^cellular_component^calyx of Held`GO:0005737^cellular_component^cytoplasm`GO:0098978^cellular_component^glutamatergic synapse`GO:0005739^cellular_component^mitochondrion`GO:0030156^molecular_function^benzodiazepine receptor binding`GO:0099626^molecular_function^voltage-gated calcium channel activity involved in regulation of presynaptic cytosolic calcium levels`GO:0070588^biological_pro…	GO:0044305^cellular_component^calyx of Held`GO:0005737^cellular_component^cytoplasm`GO:0098978^cellular_component^glutamatergic synapse`GO:0005739^cellular_component^mitochondrion`GO:0030156^molecular_function^benzodiazepine receptor binding`GO:0099626^molecular_function^voltage-gated calcium channel activity involved in regulation of presynaptic cytosolic calcium levels`GO:0070588^biological_pro…	GO:0005515^molecular_function^protein binding	181119.XP_005525953.1	0.0	991.0	KOG3632@1|root,KOG3632@2759|Eukaryota,38CCB@33154|Opisthokonta,3BEY5@33208|Metazoa,3CSJI@33213|Bilateria,481M5@7711|Chordata,497H8@7742|Vertebrata,4GU5W@8782|Aves	33208|Metazoa	T	Peripheral-type benzodiazepine receptor-associated protein	BZRAP1	GO:0003674,GO:0005102,GO:0005488,GO:0005515,GO:0005575,GO:0005622,GO:0005623,GO:0005737,GO:0005739,GO:0005829,GO:0005856,GO:0005938,GO:0006629,GO:0006694,GO:0006700,GO:0006996,GO:0007010,GO:0007154,GO:0007267,GO:0007268,GO:0007274,GO:0008150,GO:0008152,GO:0008202,GO:0008207,GO:0008610,GO:0009058,GO:0009987,GO:0010817,GO:0016043,GO:0023052,GO:0030156,GO:0030863,GO:0030865,GO:0034754,GO:0042445,GO:…	.	ko:K17591,ko:K19922	.	.	.	.	ko00000,ko01009,ko04131	.	.	.	SH3_2,SH3_9,fn3	.	.	gi|1772564362|ref|XM_021540383.2|;96.71;3009;75;4;1;3001;4483;7475;0;4987;PREDICTED: Lonchura striata domestica TSPO associated protein 1 (TSPOAP1), transcript variant X4, mRNA
NonamEVm000503t1	NonamEVm000503	.	.	NonamEVm000503t1.p1	4-4341[+]	.	.	.	.	.	TMRs:PredHel=51^Topology=i7-29o34-56i63-85o90-112i119-141o146-168i175-197o202-224i231-253o258-280i287-309o314-336i343-365o370-392i399-421o426-448i455-477o482-504i511-533o538-560i567-589o594-616i623-645o650-672i679-701o706-728i735-757o762-784i791-813o818-840i847-869o874-896i903-925o930-952i959-981o986-1008i1015-1037o1042-1064i1071-1093o1098-1120i1127-1149o1154-1176i1183-1205o1210-1232i1239-1261o12…	.	.	.	.	.	.	.	.	.	.	.	.	.	.	.	.	.	.	.	.	.	.	.	.	.	.	.	.
NonamEVm001062t1	NonamEVm001062	.	.	NonamEVm001062t1.p1	1-3315[+]	.	.	.	.	.	.	.	.	.	.	.	.	.	.	.	.	.	.	.	.	.	.	.	.	.	.	.	.	.	.	.	.	.	.
NonamEVm001184t1	NonamEVm001184	.	.	NonamEVm001184t1.p1	1-3186[+]	.	.	.	.	.	.	.	.	.	.	.	.	.	.	.	.	.	.	.	.	.	.	.	.	.	.	.	.	.	.	.	.	.	.
NonamEVm001187t1	NonamEVm001187	HIP1_MOUSE^HIP1_MOUSE^Q:1-3159,H:2-1028^68.8%ID^E:0^RecName: Full=Huntingtin-interacting protein 1 {ECO:0000250|UniProtKB:O00291};^Eukaryota; Metazoa; Chordata; Craniata; Vertebrata; Euteleostomi; Mammalia; Eutheria; Euarchontoglires; Glires; Rodentia; Myomorpha; Muroidea; Muridae; Murinae; Mus; Mus	.	NonamEVm001187t1.p1	19-3204[+]	HIP1_MOUSE^HIP1_MOUSE^Q:1-1047,H:8-1028^69%ID^E:0^RecName: Full=Huntingtin-interacting protein 1 {ECO:0000250|UniProtKB:O00291};^Eukaryota; Metazoa; Chordata; Craniata; Vertebrata; Euteleostomi; Mammalia; Eutheria; Euarchontoglires; Glires; Rodentia; Myomorpha; Muroidea; Muridae; Murinae; Mus; Mus	XP_021396053.1^XP_021396053.1^Q:1-3111,H:2-1038^98.4%ID^E:0^.^.	XP_021396053.1^XP_021396053.1^Q:1-1031,H:8-1038^98.4%ID^E:0^.^.	PF07651.21^ANTH^NULL^32-296^E:3e-83`PF16515.10^HIP1_clath_bdg^NULL^471-569^E:5.3e-34`PF01608.22^I_LWEQ^NULL^872-1020^E:2.5e-55	.	.	.	KEGG:mmu:215114	GO:0030136^cellular_component^clathrin-coated vesicle`GO:0030665^cellular_component^clathrin-coated vesicle membrane`GO:0005737^cellular_component^cytoplasm`GO:0098978^cellular_component^glutamatergic synapse`GO:0005794^cellular_component^Golgi apparatus`GO:0005634^cellular_component^nucleus`GO:0005886^cellular_component^plasma membrane`GO:0098794^cellular_component^postsynapse`GO:0045211^cellula…	GO:0030136^cellular_component^clathrin-coated vesicle`GO:0030665^cellular_component^clathrin-coated vesicle membrane`GO:0005737^cellular_component^cytoplasm`GO:0098978^cellular_component^glutamatergic synapse`GO:0005794^cellular_component^Golgi apparatus`GO:0005634^cellular_component^nucleus`GO:0005886^cellular_component^plasma membrane`GO:0098794^cellular_component^postsynapse`GO:0045211^cellula…	GO:0005543^molecular_function^phospholipid binding`GO:0003779^molecular_function^actin binding	181119.XP_005526052.1	0.0	1594.0	KOG0980@1|root,KOG0980@2759|Eukaryota,38H1K@33154|Opisthokonta,3BBY2@33208|Metazoa,3CR9H@33213|Bilateria,4813F@7711|Chordata,498B7@7742|Vertebrata,4GUG8@8782|Aves	33208|Metazoa	Z	Huntingtin interacting protein 1	HIP1	GO:0003674,GO:0003779,GO:0005102,GO:0005154,GO:0005198,GO:0005200,GO:0005488,GO:0005515,GO:0005543,GO:0005575,GO:0005622,GO:0005623,GO:0005634,GO:0005737,GO:0005794,GO:0005829,GO:0005856,GO:0005886,GO:0006810,GO:0006886,GO:0006897,GO:0006898,GO:0006915,GO:0006919,GO:0006996,GO:0007010,GO:0007154,GO:0007165,GO:0008092,GO:0008104,GO:0008150,GO:0008219,GO:0008289,GO:0009893,GO:0009898,GO:0009966,GO:…	.	ko:K04559,ko:K20040	ko05016,map05016	.	.	.	ko00000,ko00001,ko04131	.	.	.	ANTH,HIP1_clath_bdg,I_LWEQ	.	.	gi|1210004226|ref|XM_021540378.1|;97.461;3112;79;0;1;3112;55;3166;0;5310;PREDICTED: Lonchura striata domestica huntingtin interacting protein 1 (HIP1), transcript variant X1, mRNA
NonamEVm001187t2	NonamEVm001187	HIP1_HUMAN^HIP1_HUMAN^Q:14-2758,H:1-1020^71.2%ID^E:0^RecName: Full=Huntingtin-interacting protein 1;^Eukaryota; Metazoa; Chordata; Craniata; Vertebrata; Euteleostomi; Mammalia; Eutheria; Euarchontoglires; Primates; Haplorrhini; Catarrhini; Hominidae; Homo	.	NonamEVm001187t2.p1	14-2773[+]	HIP1_HUMAN^HIP1_HUMAN^Q:1-915,H:1-1020^71.2%ID^E:0^RecName: Full=Huntingtin-interacting protein 1;^Eukaryota; Metazoa; Chordata; Craniata; Vertebrata; Euteleostomi; Mammalia; Eutheria; Euarchontoglires; Primates; Haplorrhini; Catarrhini; Hominidae; Homo	XP_021396053.1^XP_021396053.1^Q:14-2770,H:1-1041^87.1%ID^E:0^.^.	XP_021396053.1^XP_021396053.1^Q:1-919,H:1-1041^87.1%ID^E:0^.^.	PF07651.21^ANTH^NULL^39-303^E:2.3e-83`PF16515.10^HIP1_clath_bdg^NULL^478-568^E:4.1e-30`PF01608.22^I_LWEQ^NULL^757-905^E:2e-55	.	.	.	KEGG:hsa:3092	GO:0030136^cellular_component^clathrin-coated vesicle`GO:0030665^cellular_component^clathrin-coated vesicle membrane`GO:0005737^cellular_component^cytoplasm`GO:0005856^cellular_component^cytoskeleton`GO:0005829^cellular_component^cytosol`GO:0098978^cellular_component^glutamatergic synapse`GO:0005794^cellular_component^Golgi apparatus`GO:0043231^cellular_component^intracellular membrane-bounded or…	GO:0030136^cellular_component^clathrin-coated vesicle`GO:0030665^cellular_component^clathrin-coated vesicle membrane`GO:0005737^cellular_component^cytoplasm`GO:0005856^cellular_component^cytoskeleton`GO:0005829^cellular_component^cytosol`GO:0098978^cellular_component^glutamatergic synapse`GO:0005794^cellular_component^Golgi apparatus`GO:0043231^cellular_component^intracellular membrane-bounded or…	GO:0005543^molecular_function^phospholipid binding`GO:0003779^molecular_function^actin binding	181119.XP_005526052.1	0.0	1410.0	KOG0980@1|root,KOG0980@2759|Eukaryota,38H1K@33154|Opisthokonta,3BBY2@33208|Metazoa,3CR9H@33213|Bilateria,4813F@7711|Chordata,498B7@7742|Vertebrata,4GUG8@8782|Aves	33208|Metazoa	Z	Huntingtin interacting protein 1	HIP1	GO:0003674,GO:0003779,GO:0005102,GO:0005154,GO:0005198,GO:0005200,GO:0005488,GO:0005515,GO:0005543,GO:0005575,GO:0005622,GO:0005623,GO:0005634,GO:0005737,GO:0005794,GO:0005829,GO:0005856,GO:0005886,GO:0006810,GO:0006886,GO:0006897,GO:0006898,GO:0006915,GO:0006919,GO:0006996,GO:0007010,GO:0007154,GO:0007165,GO:0008092,GO:0008104,GO:0008150,GO:0008219,GO:0008289,GO:0009893,GO:0009898,GO:0009966,GO:…	.	ko:K04559,ko:K20040	ko05016,map05016	.	.	.	ko00000,ko00001,ko04131	.	.	.	ANTH,HIP1_clath_bdg,I_LWEQ	.	.	gi|2451458903|ref|XM_053961309.1|;92.009;2966;158;27;1684;4579;2018;4974;0;4091;PREDICTED: Vidua chalybeata huntingtin interacting protein 1 (HIP1), transcript variant X3, mRNA
NonamEVm001187t3	NonamEVm001187	HIP1_HUMAN^HIP1_HUMAN^Q:14-1594,H:1-531^83.4%ID^E:2.85e-258^RecName: Full=Huntingtin-interacting protein 1;^Eukaryota; Metazoa; Chordata; Craniata; Vertebrata; Euteleostomi; Mammalia; Eutheria; Euarchontoglires; Primates; Haplorrhini; Catarrhini; Hominidae; Homo	.	NonamEVm001187t3.p1	14-2239[+]	HIP1_HUMAN^HIP1_HUMAN^Q:1-527,H:1-531^83.4%ID^E:9.12e-271^RecName: Full=Huntingtin-interacting protein 1;^Eukaryota; Metazoa; Chordata; Craniata; Vertebrata; Euteleostomi; Mammalia; Eutheria; Euarchontoglires; Primates; Haplorrhini; Catarrhini; Hominidae; Homo	XP_021396053.1^XP_021396053.1^Q:14-2116,H:1-701^98.4%ID^E:0^.^.	XP_021396053.1^XP_021396053.1^Q:1-701,H:1-701^98.4%ID^E:0^.^.	PF07651.21^ANTH^NULL^39-303^E:1.5e-83`PF16515.10^HIP1_clath_bdg^NULL^478-576^E:3.2e-34	.	.	.	KEGG:hsa:3092	GO:0030136^cellular_component^clathrin-coated vesicle`GO:0030665^cellular_component^clathrin-coated vesicle membrane`GO:0005737^cellular_component^cytoplasm`GO:0005856^cellular_component^cytoskeleton`GO:0005829^cellular_component^cytosol`GO:0098978^cellular_component^glutamatergic synapse`GO:0005794^cellular_component^Golgi apparatus`GO:0043231^cellular_component^intracellular membrane-bounded or…	GO:0030136^cellular_component^clathrin-coated vesicle`GO:0030665^cellular_component^clathrin-coated vesicle membrane`GO:0005737^cellular_component^cytoplasm`GO:0005856^cellular_component^cytoskeleton`GO:0005829^cellular_component^cytosol`GO:0098978^cellular_component^glutamatergic synapse`GO:0005794^cellular_component^Golgi apparatus`GO:0043231^cellular_component^intracellular membrane-bounded or…	GO:0005543^molecular_function^phospholipid binding	181119.XP_005526052.1	0.0	999.0	KOG0980@1|root,KOG0980@2759|Eukaryota,38H1K@33154|Opisthokonta,3BBY2@33208|Metazoa,3CR9H@33213|Bilateria,4813F@7711|Chordata,498B7@7742|Vertebrata,4GUG8@8782|Aves	33208|Metazoa	Z	Huntingtin interacting protein 1	HIP1	GO:0003674,GO:0003779,GO:0005102,GO:0005154,GO:0005198,GO:0005200,GO:0005488,GO:0005515,GO:0005543,GO:0005575,GO:0005622,GO:0005623,GO:0005634,GO:0005737,GO:0005794,GO:0005829,GO:0005856,GO:0005886,GO:0006810,GO:0006886,GO:0006897,GO:0006898,GO:0006915,GO:0006919,GO:0006996,GO:0007010,GO:0007154,GO:0007165,GO:0008092,GO:0008104,GO:0008150,GO:0008219,GO:0008289,GO:0009893,GO:0009898,GO:0009966,GO:…	.	ko:K04559,ko:K20040	ko05016,map05016	.	.	.	ko00000,ko00001,ko04131	.	.	.	ANTH,HIP1_clath_bdg,I_LWEQ	.	.	gi|1772564095|ref|XM_021540379.2|;95.593;2791;90;10;2198;4978;2189;4956;0;4442;PREDICTED: Lonchura striata domestica huntingtin interacting protein 1 (HIP1), transcript variant X2, mRNA
NonamEVm001187t4	NonamEVm001187	HIP1_HUMAN^HIP1_HUMAN^Q:29-1597,H:5-531^83.5%ID^E:7.6e-257^RecName: Full=Huntingtin-interacting protein 1;^Eukaryota; Metazoa; Chordata; Craniata; Vertebrata; Euteleostomi; Mammalia; Eutheria; Euarchontoglires; Primates; Haplorrhini; Catarrhini; Hominidae; Homo	.	NonamEVm001187t4.p1	1638-3260[+]	HIP1_MOUSE^HIP1_MOUSE^Q:31-536,H:537-1012^63.6%ID^E:4.25e-183^RecName: Full=Huntingtin-interacting protein 1 {ECO:0000250|UniProtKB:O00291};^Eukaryota; Metazoa; Chordata; Craniata; Vertebrata; Euteleostomi; Mammalia; Eutheria; Euarchontoglires; Glires; Rodentia; Myomorpha; Muroidea; Muridae; Murinae; Mus; Mus	XP_021396054.1^XP_021396054.1^Q:1677-3257,H:491-1008^95.6%ID^E:2.02e-302^.^.	XP_021396053.1^XP_021396053.1^Q:14-540,H:524-1041^95.6%ID^E:0^.^.	PF16515.10^HIP1_clath_bdg^NULL^13-66^E:3.2e-13`PF01608.22^I_LWEQ^NULL^378-526^E:8.2e-56	.	.	.	KEGG:mmu:215114	GO:0030136^cellular_component^clathrin-coated vesicle`GO:0030665^cellular_component^clathrin-coated vesicle membrane`GO:0005737^cellular_component^cytoplasm`GO:0005856^cellular_component^cytoskeleton`GO:0005829^cellular_component^cytosol`GO:0098978^cellular_component^glutamatergic synapse`GO:0005794^cellular_component^Golgi apparatus`GO:0043231^cellular_component^intracellular membrane-bounded or…	GO:0030136^cellular_component^clathrin-coated vesicle`GO:0030665^cellular_component^clathrin-coated vesicle membrane`GO:0005737^cellular_component^cytoplasm`GO:0098978^cellular_component^glutamatergic synapse`GO:0005794^cellular_component^Golgi apparatus`GO:0005634^cellular_component^nucleus`GO:0005886^cellular_component^plasma membrane`GO:0098794^cellular_component^postsynapse`GO:0045211^cellula…	GO:0003779^molecular_function^actin binding	181119.XP_005526052.1	5.61e-290	824.0	KOG0980@1|root,KOG0980@2759|Eukaryota,38H1K@33154|Opisthokonta,3BBY2@33208|Metazoa,3CR9H@33213|Bilateria,4813F@7711|Chordata,498B7@7742|Vertebrata,4GUG8@8782|Aves	33208|Metazoa	Z	Huntingtin interacting protein 1	HIP1	GO:0003674,GO:0003779,GO:0005102,GO:0005154,GO:0005198,GO:0005200,GO:0005488,GO:0005515,GO:0005543,GO:0005575,GO:0005622,GO:0005623,GO:0005634,GO:0005737,GO:0005794,GO:0005829,GO:0005856,GO:0005886,GO:0006810,GO:0006886,GO:0006897,GO:0006898,GO:0006915,GO:0006919,GO:0006996,GO:0007010,GO:0007154,GO:0007165,GO:0008092,GO:0008104,GO:0008150,GO:0008219,GO:0008289,GO:0009893,GO:0009898,GO:0009966,GO:…	.	ko:K04559,ko:K20040	ko05016,map05016	.	.	.	ko00000,ko00001,ko04131	.	.	.	ANTH,HIP1_clath_bdg,I_LWEQ	.	.	gi|1942946575|ref|XM_038157725.1|;92.109;5120;302;43;1;5067;73;5143;0;7123;PREDICTED: Motacilla alba alba huntingtin interacting protein 1 (HIP1), transcript variant X2, mRNA
NonamEVm001187t5	NonamEVm001187	HIP1_MOUSE^HIP1_MOUSE^Q:1-2865,H:240-1012^53%ID^E:2.36e-246^RecName: Full=Huntingtin-interacting protein 1 {ECO:0000250|UniProtKB:O00291};^Eukaryota; Metazoa; Chordata; Craniata; Vertebrata; Euteleostomi; Mammalia; Eutheria; Euarchontoglires; Glires; Rodentia; Myomorpha; Muroidea; Muridae; Murinae; Mus; Mus	.	NonamEVm001187t5.p1	1-1728[+]	HIP1_MOUSE^HIP1_MOUSE^Q:1-563,H:240-740^48.2%ID^E:2.69e-116^RecName: Full=Huntingtin-interacting protein 1 {ECO:0000250|UniProtKB:O00291};^Eukaryota; Metazoa; Chordata; Craniata; Vertebrata; Euteleostomi; Mammalia; Eutheria; Euarchontoglires; Glires; Rodentia; Myomorpha; Muroidea; Muridae; Murinae; Mus; Mus	XP_021396053.1^XP_021396053.1^Q:1-2877,H:239-1041^82.3%ID^E:0^.^.	XP_021396054.1^XP_021396054.1^Q:1-563,H:206-732^91.8%ID^E:2.45e-279^.^.	PF07651.21^ANTH^NULL^2-65^E:1.3e-15`PF16515.10^HIP1_clath_bdg^NULL^240-338^E:2.2e-34	.	.	.	KEGG:mmu:215114	GO:0030136^cellular_component^clathrin-coated vesicle`GO:0030665^cellular_component^clathrin-coated vesicle membrane`GO:0005737^cellular_component^cytoplasm`GO:0098978^cellular_component^glutamatergic synapse`GO:0005794^cellular_component^Golgi apparatus`GO:0005634^cellular_component^nucleus`GO:0005886^cellular_component^plasma membrane`GO:0098794^cellular_component^postsynapse`GO:0045211^cellula…	GO:0030136^cellular_component^clathrin-coated vesicle`GO:0030665^cellular_component^clathrin-coated vesicle membrane`GO:0005737^cellular_component^cytoplasm`GO:0098978^cellular_component^glutamatergic synapse`GO:0005794^cellular_component^Golgi apparatus`GO:0005634^cellular_component^nucleus`GO:0005886^cellular_component^plasma membrane`GO:0098794^cellular_component^postsynapse`GO:0045211^cellula…	GO:0005543^molecular_function^phospholipid binding	59894.ENSFALP00000014304	1.44e-243	701.0	KOG0980@1|root,KOG0980@2759|Eukaryota,38H1K@33154|Opisthokonta,3BBY2@33208|Metazoa,3CR9H@33213|Bilateria,4813F@7711|Chordata,498B7@7742|Vertebrata,4GUG8@8782|Aves	33208|Metazoa	Z	Huntingtin interacting protein 1	HIP1	GO:0003674,GO:0003779,GO:0005102,GO:0005154,GO:0005198,GO:0005200,GO:0005488,GO:0005515,GO:0005543,GO:0005575,GO:0005622,GO:0005623,GO:0005634,GO:0005737,GO:0005794,GO:0005829,GO:0005856,GO:0005886,GO:0006810,GO:0006886,GO:0006897,GO:0006898,GO:0006915,GO:0006919,GO:0006996,GO:0007010,GO:0007154,GO:0007165,GO:0008092,GO:0008104,GO:0008150,GO:0008219,GO:0008289,GO:0009893,GO:0009898,GO:0009966,GO:…	.	ko:K04559,ko:K20040	ko05016,map05016	.	.	.	ko00000,ko00001,ko04131	.	.	.	ANTH,HIP1_clath_bdg,I_LWEQ	.	.	gi|2451458903|ref|XM_053961309.1|;91.953;2821;148;27;1936;4686;2163;4974;0;3879;PREDICTED: Vidua chalybeata huntingtin interacting protein 1 (HIP1), transcript variant X3, mRNA
NonamEVm001187t6	NonamEVm001187	HIP1_HUMAN^HIP1_HUMAN^Q:14-1594,H:1-531^83.4%ID^E:2.01e-256^RecName: Full=Huntingtin-interacting protein 1;^Eukaryota; Metazoa; Chordata; Craniata; Vertebrata; Euteleostomi; Mammalia; Eutheria; Euarchontoglires; Primates; Haplorrhini; Catarrhini; Hominidae; Homo	.	NonamEVm001187t6.p1	14-2194[+]	HIP1_HUMAN^HIP1_HUMAN^Q:1-527,H:1-531^83.4%ID^E:5.28e-271^RecName: Full=Huntingtin-interacting protein 1;^Eukaryota; Metazoa; Chordata; Craniata; Vertebrata; Euteleostomi; Mammalia; Eutheria; Euarchontoglires; Primates; Haplorrhini; Catarrhini; Hominidae; Homo	XP_021396053.1^XP_021396053.1^Q:14-2110,H:1-699^98.6%ID^E:0^.^.	XP_021396053.1^XP_021396053.1^Q:1-699,H:1-699^98.6%ID^E:0^.^.	PF07651.21^ANTH^NULL^39-303^E:1.4e-83`PF16515.10^HIP1_clath_bdg^NULL^478-576^E:3.1e-34	.	.	.	KEGG:hsa:3092	GO:0030136^cellular_component^clathrin-coated vesicle`GO:0030665^cellular_component^clathrin-coated vesicle membrane`GO:0005737^cellular_component^cytoplasm`GO:0005856^cellular_component^cytoskeleton`GO:0005829^cellular_component^cytosol`GO:0098978^cellular_component^glutamatergic synapse`GO:0005794^cellular_component^Golgi apparatus`GO:0043231^cellular_component^intracellular membrane-bounded or…	GO:0030136^cellular_component^clathrin-coated vesicle`GO:0030665^cellular_component^clathrin-coated vesicle membrane`GO:0005737^cellular_component^cytoplasm`GO:0005856^cellular_component^cytoskeleton`GO:0005829^cellular_component^cytosol`GO:0098978^cellular_component^glutamatergic synapse`GO:0005794^cellular_component^Golgi apparatus`GO:0043231^cellular_component^intracellular membrane-bounded or…	GO:0005543^molecular_function^phospholipid binding	181119.XP_005526052.1	0.0	998.0	KOG0980@1|root,KOG0980@2759|Eukaryota,38H1K@33154|Opisthokonta,3BBY2@33208|Metazoa,3CR9H@33213|Bilateria,4813F@7711|Chordata,498B7@7742|Vertebrata,4GUG8@8782|Aves	33208|Metazoa	Z	Huntingtin interacting protein 1	HIP1	GO:0003674,GO:0003779,GO:0005102,GO:0005154,GO:0005198,GO:0005200,GO:0005488,GO:0005515,GO:0005543,GO:0005575,GO:0005622,GO:0005623,GO:0005634,GO:0005737,GO:0005794,GO:0005829,GO:0005856,GO:0005886,GO:0006810,GO:0006886,GO:0006897,GO:0006898,GO:0006915,GO:0006919,GO:0006996,GO:0007010,GO:0007154,GO:0007165,GO:0008092,GO:0008104,GO:0008150,GO:0008219,GO:0008289,GO:0009893,GO:0009898,GO:0009966,GO:…	.	ko:K04559,ko:K20040	ko05016,map05016	.	.	.	ko00000,ko00001,ko04131	.	.	.	ANTH,HIP1_clath_bdg,I_LWEQ	.	.	gi|1772564095|ref|XM_021540379.2|;95.629;2791;90;9;2714;5495;2189;4956;0;4449;PREDICTED: Lonchura striata domestica huntingtin interacting protein 1 (HIP1), transcript variant X2, mRNA
NonamEVm001187t7	NonamEVm001187	HIP1_HUMAN^HIP1_HUMAN^Q:14-757,H:1-249^92.8%ID^E:2.43e-159^RecName: Full=Huntingtin-interacting protein 1;^Eukaryota; Metazoa; Chordata; Craniata; Vertebrata; Euteleostomi; Mammalia; Eutheria; Euarchontoglires; Primates; Haplorrhini; Catarrhini; Hominidae; Homo	.	NonamEVm001187t7.p1	2-784[+]	HIP1_HUMAN^HIP1_HUMAN^Q:5-252,H:1-249^92.8%ID^E:5.81e-159^RecName: Full=Huntingtin-interacting protein 1;^Eukaryota; Metazoa; Chordata; Craniata; Vertebrata; Euteleostomi; Mammalia; Eutheria; Euarchontoglires; Primates; Haplorrhini; Catarrhini; Hominidae; Homo	XP_014110577.1^XP_014110577.1^Q:14-757,H:1-248^99.2%ID^E:3.05e-167^.^.	XP_014110577.1^XP_014110577.1^Q:5-252,H:1-248^99.2%ID^E:7.27e-167^.^.	PF07651.21^ANTH^NULL^43-252^E:1.5e-65	.	.	.	KEGG:hsa:3092	GO:0030136^cellular_component^clathrin-coated vesicle`GO:0030665^cellular_component^clathrin-coated vesicle membrane`GO:0005737^cellular_component^cytoplasm`GO:0005856^cellular_component^cytoskeleton`GO:0005829^cellular_component^cytosol`GO:0098978^cellular_component^glutamatergic synapse`GO:0005794^cellular_component^Golgi apparatus`GO:0043231^cellular_component^intracellular membrane-bounded or…	GO:0030136^cellular_component^clathrin-coated vesicle`GO:0030665^cellular_component^clathrin-coated vesicle membrane`GO:0005737^cellular_component^cytoplasm`GO:0005856^cellular_component^cytoskeleton`GO:0005829^cellular_component^cytosol`GO:0098978^cellular_component^glutamatergic synapse`GO:0005794^cellular_component^Golgi apparatus`GO:0043231^cellular_component^intracellular membrane-bounded or…	GO:0005543^molecular_function^phospholipid binding	9031.ENSGALP00000001365	9.01e-165	490.0	KOG0980@1|root,KOG0980@2759|Eukaryota,38H1K@33154|Opisthokonta,3BBY2@33208|Metazoa,3CR9H@33213|Bilateria,4813F@7711|Chordata,498B7@7742|Vertebrata,4GUG8@8782|Aves	33208|Metazoa	Z	Huntingtin interacting protein 1	HIP1	GO:0003674,GO:0003779,GO:0005102,GO:0005154,GO:0005198,GO:0005200,GO:0005488,GO:0005515,GO:0005543,GO:0005575,GO:0005622,GO:0005623,GO:0005634,GO:0005737,GO:0005794,GO:0005829,GO:0005856,GO:0005886,GO:0006810,GO:0006886,GO:0006897,GO:0006898,GO:0006915,GO:0006919,GO:0006996,GO:0007010,GO:0007154,GO:0007165,GO:0008092,GO:0008104,GO:0008150,GO:0008219,GO:0008289,GO:0009893,GO:0009898,GO:0009966,GO:…	.	ko:K04559,ko:K20040	ko05016,map05016	.	.	.	ko00000,ko00001,ko04131	.	.	.	ANTH,HIP1_clath_bdg,I_LWEQ	.	.	gi|1210004226|ref|XM_021540378.1|;98.151;757;14;0;1;757;39;795;0;1321;PREDICTED: Lonchura striata domestica huntingtin interacting protein 1 (HIP1), transcript variant X1, mRNA
NonamEVm001187t8	NonamEVm001187	HIP1_HUMAN^HIP1_HUMAN^Q:1-840,H:741-1020^85.7%ID^E:7.46e-137^RecName: Full=Huntingtin-interacting protein 1;^Eukaryota; Metazoa; Chordata; Craniata; Vertebrata; Euteleostomi; Mammalia; Eutheria; Euarchontoglires; Primates; Haplorrhini; Catarrhini; Hominidae; Homo	.	NonamEVm001187t8.p1	10-855[+]	HIP1_HUMAN^HIP1_HUMAN^Q:5-277,H:748-1020^87.5%ID^E:2.56e-144^RecName: Full=Huntingtin-interacting protein 1;^Eukaryota; Metazoa; Chordata; Craniata; Vertebrata; Euteleostomi; Mammalia; Eutheria; Euarchontoglires; Primates; Haplorrhini; Catarrhini; Hominidae; Homo	RLV97866.1^RLV97866.1^Q:1-852,H:728-1011^99.6%ID^E:1.67e-163^.^.	RLV97866.1^RLV97866.1^Q:1-281,H:731-1011^99.6%ID^E:2.46e-169^.^.	PF01608.22^I_LWEQ^NULL^119-267^E:1.9e-56	.	.	.	KEGG:hsa:3092	GO:0030136^cellular_component^clathrin-coated vesicle`GO:0030665^cellular_component^clathrin-coated vesicle membrane`GO:0005737^cellular_component^cytoplasm`GO:0005856^cellular_component^cytoskeleton`GO:0005829^cellular_component^cytosol`GO:0098978^cellular_component^glutamatergic synapse`GO:0005794^cellular_component^Golgi apparatus`GO:0043231^cellular_component^intracellular membrane-bounded or…	GO:0030136^cellular_component^clathrin-coated vesicle`GO:0030665^cellular_component^clathrin-coated vesicle membrane`GO:0005737^cellular_component^cytoplasm`GO:0005856^cellular_component^cytoskeleton`GO:0005829^cellular_component^cytosol`GO:0098978^cellular_component^glutamatergic synapse`GO:0005794^cellular_component^Golgi apparatus`GO:0043231^cellular_component^intracellular membrane-bounded or…	GO:0003779^molecular_function^actin binding	59894.ENSFALP00000014304	1.75e-168	497.0	KOG0980@1|root,KOG0980@2759|Eukaryota,38H1K@33154|Opisthokonta,3BBY2@33208|Metazoa,3CR9H@33213|Bilateria,4813F@7711|Chordata,498B7@7742|Vertebrata,4GUG8@8782|Aves	33208|Metazoa	Z	Huntingtin interacting protein 1	HIP1	GO:0003674,GO:0003779,GO:0005102,GO:0005154,GO:0005198,GO:0005200,GO:0005488,GO:0005515,GO:0005543,GO:0005575,GO:0005622,GO:0005623,GO:0005634,GO:0005737,GO:0005794,GO:0005829,GO:0005856,GO:0005886,GO:0006810,GO:0006886,GO:0006897,GO:0006898,GO:0006915,GO:0006919,GO:0006996,GO:0007010,GO:0007154,GO:0007165,GO:0008092,GO:0008104,GO:0008150,GO:0008219,GO:0008289,GO:0009893,GO:0009898,GO:0009966,GO:…	.	ko:K04559,ko:K20040	ko05016,map05016	.	.	.	ko00000,ko00001,ko04131	.	.	.	ANTH,HIP1_clath_bdg,I_LWEQ	.	.	gi|2451458903|ref|XM_053961309.1|;91.981;2731;140;27;1;2661;2253;4974;0;3757;PREDICTED: Vidua chalybeata huntingtin interacting protein 1 (HIP1), transcript variant X3, mRNA
NonamEVm001257t1	NonamEVm001257	.	.	NonamEVm001257t1.p1	1-3117[+]	.	.	.	.	.	TMRs:PredHel=38^Topology=i7-29o33-55i62-84o88-110i117-139o143-165i172-194o198-220i227-249o253-275i282-304o308-330i337-359o363-385i392-414o418-440i447-469o473-495i502-524o528-550i557-579o583-605i612-634o638-660i667-689o693-715i722-744o748-770i777-799o803-825i832-854o858-880i887-909o913-935i937-959o963-985i987-1009o1013-1035i	.	.	.	.	.	.	.	.	.	.	.	.	.	.	.	.	.	.	.	.	.	.	.	.	.	.	.	.
NonamEVm001305t1	NonamEVm001305	.	.	NonamEVm001305t1.p1	1-3069[+]	.	.	.	.	.	.	.	.	.	.	.	.	.	.	.	.	.	.	.	.	.	.	.	.	.	.	.	.	.	.	.	.	.	.
NonamEVm001445t1	NonamEVm001445	.	.	NonamEVm001445t1.p1	1-2919[+]	.	.	.	.	.	.	.	.	.	.	.	.	.	.	.	.	.	.	.	.	.	.	.	.	.	.	.	.	.	.	.	.	.	.
NonamEVm001793t1	NonamEVm001793	ELN_CHICK^ELN_CHICK^Q:17-865,H:1-263^57.7%ID^E:1.43e-39^RecName: Full=Elastin;^Eukaryota; Metazoa; Chordata; Craniata; Vertebrata; Euteleostomi; Archelosauria; Archosauria; Dinosauria; Saurischia; Theropoda; Coelurosauria; Aves; Neognathae; Galloanserae; Galliformes; Phasianidae; Phasianinae; Gallus	.	NonamEVm001793t1.p1	14-2692[+]	ELN_CHICK^ELN_CHICK^Q:2-284,H:1-263^57.7%ID^E:8.45e-40^RecName: Full=Elastin;^Eukaryota; Metazoa; Chordata; Craniata; Vertebrata; Euteleostomi; Archelosauria; Archosauria; Dinosauria; Saurischia; Theropoda; Coelurosauria; Aves; Neognathae; Galloanserae; Galliformes; Phasianidae; Phasianinae; Gallus	XP_016158565.1^XP_016158565.1^Q:14-2497,H:1-922^77.9%ID^E:7.94e-150^.^.	XP_016158565.1^XP_016158565.1^Q:1-828,H:1-922^77.9%ID^E:4.84e-152^.^.	.	sigP:1^26^0.99950796	.	.	.	GO:0062023^cellular_component^collagen-containing extracellular matrix`GO:0005576^cellular_component^extracellular region`GO:0005201^molecular_function^extracellular matrix structural constituent	GO:0062023^cellular_component^collagen-containing extracellular matrix`GO:0005576^cellular_component^extracellular region`GO:0005201^molecular_function^extracellular matrix structural constituent	.	181119.XP_005526046.1	2.25e-105	353.0	2AB8N@1|root,2RYNR@2759|Eukaryota,39TQ5@33154|Opisthokonta,3BN5V@33208|Metazoa,3D0PR@33213|Bilateria,485YH@7711|Chordata,4929C@7742|Vertebrata,4GK84@8782|Aves	33208|Metazoa	S	Major structural protein of tissues such as aorta and nuchal ligament, which must expand rapidly and recover completely. Molecular determinant of the late arterial morphogenesis, stabilizing arterial structure by regulating proliferation and organization of vascular smooth muscle	ELN	GO:0001101,GO:0001568,GO:0001666,GO:0001944,GO:0001974,GO:0003007,GO:0003008,GO:0003013,GO:0003151,GO:0003170,GO:0003176,GO:0003179,GO:0003180,GO:0003674,GO:0005198,GO:0005201,GO:0005488,GO:0005575,GO:0005576,GO:0005615,GO:0006950,GO:0006996,GO:0007010,GO:0007015,GO:0007154,GO:0007275,GO:0007507,GO:0007517,GO:0007519,GO:0007568,GO:0007584,GO:0007585,GO:0008015,GO:0008064,GO:0008150,GO:0008283,GO:…	.	ko:K14211	ko04974,map04974	.	.	.	ko00000,ko00001	.	.	.	.	.	.	gi|1993866254|ref|XM_039732962.1|;87.943;1891;121;47;1391;3248;1072;2888;0;2130;PREDICTED: Passer montanus elastin (ELN), transcript variant X4, mRNA
NonamEVm002008t1	NonamEVm002008	AUTS2_HUMAN^AUTS2_HUMAN^Q:88-2601,H:404-1259^82.4%ID^E:0^RecName: Full=Autism susceptibility gene 2 protein;^Eukaryota; Metazoa; Chordata; Craniata; Vertebrata; Euteleostomi; Mammalia; Eutheria; Euarchontoglires; Primates; Haplorrhini; Catarrhini; Hominidae; Homo	.	NonamEVm002008t1.p1	58-2604[+]	AUTS2_HUMAN^AUTS2_HUMAN^Q:11-848,H:404-1259^82.4%ID^E:0^RecName: Full=Autism susceptibility gene 2 protein;^Eukaryota; Metazoa; Chordata; Craniata; Vertebrata; Euteleostomi; Mammalia; Eutheria; Euarchontoglires; Primates; Haplorrhini; Catarrhini; Hominidae; Homo	XP_041280981.1^XP_041280981.1^Q:88-2601,H:404-1256^98.1%ID^E:0^.^.	XP_041280981.1^XP_041280981.1^Q:11-848,H:404-1256^98.1%ID^E:0^.^.	PF15336.11^Auts2^NULL^237-449^E:4.6e-105	.	.	.	KEGG:hsa:26053	GO:0005737^cellular_component^cytoplasm`GO:0005856^cellular_component^cytoskeleton`GO:0030426^cellular_component^growth cone`GO:0005634^cellular_component^nucleus`GO:0003682^molecular_function^chromatin binding`GO:0030036^biological_process^actin cytoskeleton organization`GO:0048675^biological_process^axon extension`GO:0097484^biological_process^dendrite extension`GO:0001764^biological_process^ne…	GO:0005737^cellular_component^cytoplasm`GO:0005856^cellular_component^cytoskeleton`GO:0030426^cellular_component^growth cone`GO:0005634^cellular_component^nucleus`GO:0003682^molecular_function^chromatin binding`GO:0030036^biological_process^actin cytoskeleton organization`GO:0048675^biological_process^axon extension`GO:0097484^biological_process^dendrite extension`GO:0001764^biological_process^ne…	.	52644.XP_010584215.1	0.0	1546.0	28K2N@1|root,2QSH4@2759|Eukaryota,39E06@33154|Opisthokonta,3BCNX@33208|Metazoa,3D31Z@33213|Bilateria,48026@7711|Chordata,491D7@7742|Vertebrata,4GMCU@8782|Aves	33208|Metazoa	S	positive regulation of histone H4-K16 acetylation	AUTS2	GO:0000902,GO:0000904,GO:0001764,GO:0002009,GO:0002165,GO:0003674,GO:0003682,GO:0005488,GO:0005575,GO:0005622,GO:0005623,GO:0005634,GO:0006355,GO:0006357,GO:0006928,GO:0006996,GO:0007010,GO:0007275,GO:0007399,GO:0007409,GO:0007444,GO:0007472,GO:0007476,GO:0007552,GO:0007560,GO:0007610,GO:0007626,GO:0007628,GO:0007632,GO:0007633,GO:0008150,GO:0008344,GO:0008586,GO:0009314,GO:0009416,GO:0009605,GO:…	.	.	.	.	.	.	.	.	.	.	Auts2	.	.	gi|2463994577|ref|XM_054516998.1|;97.777;3959;77;5;89;4037;1515;5472;0;6813;PREDICTED: Molothrus ater activator of transcription and developmental regulator AUTS2 (AUTS2), transcript variant X5, mRNA
NonamEVm002024t1	NonamEVm002024	PO121_RAT^PO121_RAT^Q:1-2532,H:396-1199^36.8%ID^E:1.21e-62^RecName: Full=Nuclear envelope pore membrane protein POM 121;^Eukaryota; Metazoa; Chordata; Craniata; Vertebrata; Euteleostomi; Mammalia; Eutheria; Euarchontoglires; Glires; Rodentia; Myomorpha; Muroidea; Muridae; Murinae; Rattus	.	NonamEVm002024t1.p1	1-2535[+]	PO121_RAT^PO121_RAT^Q:1-844,H:396-1199^36.8%ID^E:2.76e-63^RecName: Full=Nuclear envelope pore membrane protein POM 121;^Eukaryota; Metazoa; Chordata; Craniata; Vertebrata; Euteleostomi; Mammalia; Eutheria; Euarchontoglires; Glires; Rodentia; Myomorpha; Muroidea; Muridae; Murinae; Rattus	XP_021396071.1^XP_021396071.1^Q:1-2532,H:285-1131^92.6%ID^E:0^.^.	XP_021396071.1^XP_021396071.1^Q:1-844,H:285-1131^92.6%ID^E:0^.^.	PF15229.11^POM121^NULL^1-131^E:5.7e-53	.	.	.	KEGG:rno:113975	GO:0005789^cellular_component^endoplasmic reticulum membrane`GO:0005635^cellular_component^nuclear envelope`GO:0031965^cellular_component^nuclear membrane`GO:0005643^cellular_component^nuclear pore`GO:0008139^molecular_function^nuclear localization sequence binding`GO:0017056^molecular_function^structural constituent of nuclear pore`GO:0051028^biological_process^mRNA transport`GO:0006999^biologic…	GO:0005789^cellular_component^endoplasmic reticulum membrane`GO:0005635^cellular_component^nuclear envelope`GO:0031965^cellular_component^nuclear membrane`GO:0005643^cellular_component^nuclear pore`GO:0008139^molecular_function^nuclear localization sequence binding`GO:0017056^molecular_function^structural constituent of nuclear pore`GO:0051028^biological_process^mRNA transport`GO:0006999^biologic…	.	59894.ENSFALP00000014302	2.31e-315	899.0	28YNY@1|root,2R5GW@2759|Eukaryota,38I0H@33154|Opisthokonta,3BE5Y@33208|Metazoa,3D0N4@33213|Bilateria,48ADM@7711|Chordata,48YY8@7742|Vertebrata,4GJ0B@8782|Aves	33208|Metazoa	S	Nuclear envelope pore membrane protein POM	POM121C	GO:0003674,GO:0005048,GO:0005198,GO:0005488,GO:0005575,GO:0005622,GO:0005623,GO:0005634,GO:0005635,GO:0005643,GO:0005654,GO:0006403,GO:0006405,GO:0006406,GO:0006606,GO:0006611,GO:0006810,GO:0006886,GO:0006913,GO:0006996,GO:0006997,GO:0006999,GO:0008104,GO:0008139,GO:0008150,GO:0008152,GO:0009987,GO:0010467,GO:0012505,GO:0015031,GO:0015833,GO:0015931,GO:0016020,GO:0016032,GO:0016043,GO:0017038,GO:…	.	ko:K14316	ko03013,map03013	M00427	.	.	ko00000,ko00001,ko00002,ko03019	1.I.1	.	.	POM121	.	.	gi|2451458431|ref|XM_053961179.1|;94.042;3877;173;13;1;3820;682;4557;0;5827;PREDICTED: Vidua chalybeata POM121 transmembrane nucleoporin (POM121), mRNA
NonamEVm002024t2	NonamEVm002024	PO121_RAT^PO121_RAT^Q:733-1656,H:890-1199^45.2%ID^E:5.35e-30^RecName: Full=Nuclear envelope pore membrane protein POM 121;^Eukaryota; Metazoa; Chordata; Craniata; Vertebrata; Euteleostomi; Mammalia; Eutheria; Euarchontoglires; Glires; Rodentia; Myomorpha; Muroidea; Muridae; Murinae; Rattus	.	NonamEVm002024t2.p1	1-1659[+]	PO121_RAT^PO121_RAT^Q:245-552,H:890-1199^45.2%ID^E:3.24e-30^RecName: Full=Nuclear envelope pore membrane protein POM 121;^Eukaryota; Metazoa; Chordata; Craniata; Vertebrata; Euteleostomi; Mammalia; Eutheria; Euarchontoglires; Glires; Rodentia; Myomorpha; Muroidea; Muridae; Murinae; Rattus	OWK52484.1^OWK52484.1^Q:79-1656,H:350-875^95.2%ID^E:1.7e-239^.^.	OWK52484.1^OWK52484.1^Q:27-552,H:350-875^95.2%ID^E:5.39e-245^.^.	.	.	.	.	KEGG:rno:113975	GO:0005789^cellular_component^endoplasmic reticulum membrane`GO:0005635^cellular_component^nuclear envelope`GO:0031965^cellular_component^nuclear membrane`GO:0005643^cellular_component^nuclear pore`GO:0008139^molecular_function^nuclear localization sequence binding`GO:0017056^molecular_function^structural constituent of nuclear pore`GO:0051028^biological_process^mRNA transport`GO:0006999^biologic…	GO:0005789^cellular_component^endoplasmic reticulum membrane`GO:0005635^cellular_component^nuclear envelope`GO:0031965^cellular_component^nuclear membrane`GO:0005643^cellular_component^nuclear pore`GO:0008139^molecular_function^nuclear localization sequence binding`GO:0017056^molecular_function^structural constituent of nuclear pore`GO:0051028^biological_process^mRNA transport`GO:0006999^biologic…	.	181119.XP_005526053.1	6.82e-198	590.0	28YNY@1|root,2R5GW@2759|Eukaryota,38I0H@33154|Opisthokonta,3BE5Y@33208|Metazoa,3D0N4@33213|Bilateria,48ADM@7711|Chordata,48YY8@7742|Vertebrata,4GJ0B@8782|Aves	33208|Metazoa	S	Nuclear envelope pore membrane protein POM	POM121C	GO:0003674,GO:0005048,GO:0005198,GO:0005488,GO:0005575,GO:0005622,GO:0005623,GO:0005634,GO:0005635,GO:0005643,GO:0005654,GO:0006403,GO:0006405,GO:0006406,GO:0006606,GO:0006611,GO:0006810,GO:0006886,GO:0006913,GO:0006996,GO:0006997,GO:0006999,GO:0008104,GO:0008139,GO:0008150,GO:0008152,GO:0009987,GO:0010467,GO:0012505,GO:0015031,GO:0015833,GO:0015931,GO:0016020,GO:0016032,GO:0016043,GO:0017038,GO:…	.	ko:K14316	ko03013,map03013	M00427	.	.	ko00000,ko00001,ko00002,ko03019	1.I.1	.	.	POM121	.	.	gi|2451486514|ref|XM_053995496.1|;95.319;2884;117;8;78;2944;1689;4571;0;4562;PREDICTED: Vidua macroura POM121 transmembrane nucleoporin (POM121), mRNA
NonamEVm002239t11	NonamEVm002239	PLAP_MOUSE^PLAP_MOUSE^Q:62-556,H:1-165^83%ID^E:2.2e-94^RecName: Full=Phospholipase A-2-activating protein;^Eukaryota; Metazoa; Chordata; Craniata; Vertebrata; Euteleostomi; Mammalia; Eutheria; Euarchontoglires; Glires; Rodentia; Myomorpha; Muroidea; Muridae; Murinae; Mus; Mus	.	NonamEVm002239t11.p1	2-646[+]	PLAP_MOUSE^PLAP_MOUSE^Q:21-185,H:1-165^83%ID^E:1.88e-94^RecName: Full=Phospholipase A-2-activating protein;^Eukaryota; Metazoa; Chordata; Craniata; Vertebrata; Euteleostomi; Mammalia; Eutheria; Euarchontoglires; Glires; Rodentia; Myomorpha; Muroidea; Muridae; Murinae; Mus; Mus	XP_041871234.1^XP_041871234.1^Q:8-556,H:167-349^94.5%ID^E:5.6e-119^.^.	XP_041871234.1^XP_041871234.1^Q:3-185,H:167-349^94.5%ID^E:4.77e-119^.^.	PF00400.37^WD40^NULL^32-66^E:0.00054`PF00400.37^WD40^NULL^78-117^E:3.2e-05`PF00400.37^WD40^NULL^124-158^E:7.1e-08`PF00400.37^WD40^NULL^162-198^E:4.6e-10	.	.	.	KEGG:mmu:18786	GO:0005737^cellular_component^cytoplasm`GO:0070062^cellular_component^extracellular exosome`GO:0005634^cellular_component^nucleus`GO:0045202^cellular_component^synapse`GO:0016005^molecular_function^phospholipase A2 activator activity`GO:0043130^molecular_function^ubiquitin binding`GO:0071222^biological_process^cellular response to lipopolysaccharide`GO:0006954^biological_process^inflammatory resp…	GO:0005737^cellular_component^cytoplasm`GO:0070062^cellular_component^extracellular exosome`GO:0005634^cellular_component^nucleus`GO:0045202^cellular_component^synapse`GO:0016005^molecular_function^phospholipase A2 activator activity`GO:0043130^molecular_function^ubiquitin binding`GO:0071222^biological_process^cellular response to lipopolysaccharide`GO:0006954^biological_process^inflammatory resp…	GO:0005515^molecular_function^protein binding	59894.ENSFALP00000007672	3.64e-121	370.0	KOG0301@1|root,KOG0301@2759|Eukaryota,38BSR@33154|Opisthokonta,3BCQ8@33208|Metazoa,3CVJQ@33213|Bilateria,48AFV@7711|Chordata,48YJ8@7742|Vertebrata,4GP2V@8782|Aves	33208|Metazoa	I	Phospholipase A2-activating protein	PLAA	GO:0001558,GO:0002237,GO:0003674,GO:0005488,GO:0005515,GO:0005575,GO:0005576,GO:0005615,GO:0005622,GO:0005623,GO:0005634,GO:0005737,GO:0006082,GO:0006508,GO:0006511,GO:0006629,GO:0006631,GO:0006644,GO:0006690,GO:0006692,GO:0006693,GO:0006793,GO:0006796,GO:0006807,GO:0006914,GO:0006950,GO:0006952,GO:0006954,GO:0007154,GO:0007165,GO:0007275,GO:0007399,GO:0008047,GO:0008150,GO:0008152,GO:0009056,GO:…	.	ko:K14018	ko04141,map04141	.	.	.	ko00000,ko00001	.	.	.	PFU,PUL,WD40	.	.	gi|2043888284|ref|XM_041711188.1|;100;624;0;0;4;627;1;624;0;1153;PREDICTED: Taeniopygia guttata phospholipase A2 activating protein (PLAA), mRNA
NonamEVm002808t1	NonamEVm002808	TYW1_HUMAN^TYW1_HUMAN^Q:209-2365,H:1-732^69.6%ID^E:0^RecName: Full=S-adenosyl-L-methionine-dependent tRNA 4-demethylwyosine synthase TYW1;^Eukaryota; Metazoa; Chordata; Craniata; Vertebrata; Euteleostomi; Mammalia; Eutheria; Euarchontoglires; Primates; Haplorrhini; Catarrhini; Hominidae; Homo	.	NonamEVm002808t1.p1	221-2368[+]	TYW1_HUMAN^TYW1_HUMAN^Q:2-715,H:6-732^69.8%ID^E:0^RecName: Full=S-adenosyl-L-methionine-dependent tRNA 4-demethylwyosine synthase TYW1;^Eukaryota; Metazoa; Chordata; Craniata; Vertebrata; Euteleostomi; Mammalia; Eutheria; Euarchontoglires; Primates; Haplorrhini; Catarrhini; Hominidae; Homo	XP_041280982.1^XP_041280982.1^Q:221-2365,H:1-715^95.5%ID^E:0^.^.	XP_041280982.1^XP_041280982.1^Q:1-715,H:1-715^95.5%ID^E:0^.^.	PF00258.30^Flavodoxin_1^NULL^82-220^E:7.1e-27`PF04055.26^Radical_SAM^NULL^397-575^E:3.6e-16`PF08608.17^Wyosine_form^NULL^578-640^E:2.7e-24	.	TMRs:PredHel=1^Topology=i13-35o	.	KEGG:hsa:55253	GO:0051539^molecular_function^4 iron, 4 sulfur cluster binding`GO:0010181^molecular_function^FMN binding`GO:0046872^molecular_function^metal ion binding`GO:0102521^molecular_function^tRNA-4-demethylwyosine synthase activity`GO:0031591^biological_process^wybutosine biosynthetic process	GO:0051539^molecular_function^4 iron, 4 sulfur cluster binding`GO:0010181^molecular_function^FMN binding`GO:0046872^molecular_function^metal ion binding`GO:0102521^molecular_function^tRNA-4-demethylwyosine synthase activity`GO:0031591^biological_process^wybutosine biosynthetic process	GO:0010181^molecular_function^FMN binding`GO:0003824^molecular_function^catalytic activity`GO:0051536^molecular_function^iron-sulfur cluster binding	181119.XP_005526043.1	0.0	1360.0	COG0731@1|root,KOG1160@2759|Eukaryota,38C7H@33154|Opisthokonta,3BD3N@33208|Metazoa,3CYJS@33213|Bilateria,486FF@7711|Chordata,494DW@7742|Vertebrata,4GKAF@8782|Aves	33208|Metazoa	C	tRNA wybutosine-synthesizing protein 1	TYW1	.	4.1.3.44	ko:K15449	.	.	.	.	ko00000,ko01000,ko03016	.	.	.	Flavodoxin_1,Radical_SAM,Wyosine_form	.	.	gi|2451486247|ref|XM_053995423.1|;96.63;3116;97;3;44;3151;44;3159;0;5166;PREDICTED: Vidua macroura S-adenosyl-L-methionine-dependent tRNA 4-demethylwyosine synthase TYW1-like (LOC128817159), transcript variant X2, mRNA
NonamEVm002808t2	NonamEVm002808	TYW1_HUMAN^TYW1_HUMAN^Q:201-2075,H:1-732^62.3%ID^E:2.36999980070219e-317^RecName: Full=S-adenosyl-L-methionine-dependent tRNA 4-demethylwyosine synthase TYW1;^Eukaryota; Metazoa; Chordata; Craniata; Vertebrata; Euteleostomi; Mammalia; Eutheria; Euarchontoglires; Primates; Haplorrhini; Catarrhini; Hominidae; Homo	.	NonamEVm002808t2.p1	213-2078[+]	TYW1_HUMAN^TYW1_HUMAN^Q:2-621,H:6-732^62.5%ID^E:0^RecName: Full=S-adenosyl-L-methionine-dependent tRNA 4-demethylwyosine synthase TYW1;^Eukaryota; Metazoa; Chordata; Craniata; Vertebrata; Euteleostomi; Mammalia; Eutheria; Euarchontoglires; Primates; Haplorrhini; Catarrhini; Hominidae; Homo	XP_041280982.1^XP_041280982.1^Q:213-2075,H:1-715^83.5%ID^E:0^.^.	XP_041280982.1^XP_041280982.1^Q:1-621,H:1-715^83.5%ID^E:0^.^.	PF00258.30^Flavodoxin_1^NULL^82-202^E:1.7e-22`PF04055.26^Radical_SAM^NULL^303-481^E:2.8e-16`PF08608.17^Wyosine_form^NULL^484-546^E:2.3e-24	.	TMRs:PredHel=1^Topology=i13-35o	.	KEGG:hsa:55253	GO:0051539^molecular_function^4 iron, 4 sulfur cluster binding`GO:0010181^molecular_function^FMN binding`GO:0046872^molecular_function^metal ion binding`GO:0102521^molecular_function^tRNA-4-demethylwyosine synthase activity`GO:0031591^biological_process^wybutosine biosynthetic process	GO:0051539^molecular_function^4 iron, 4 sulfur cluster binding`GO:0010181^molecular_function^FMN binding`GO:0046872^molecular_function^metal ion binding`GO:0102521^molecular_function^tRNA-4-demethylwyosine synthase activity`GO:0031591^biological_process^wybutosine biosynthetic process	GO:0010181^molecular_function^FMN binding`GO:0003824^molecular_function^catalytic activity`GO:0051536^molecular_function^iron-sulfur cluster binding	181119.XP_005526043.1	0.0	1152.0	COG0731@1|root,KOG1160@2759|Eukaryota,38C7H@33154|Opisthokonta,3BD3N@33208|Metazoa,3CYJS@33213|Bilateria,486FF@7711|Chordata,494DW@7742|Vertebrata,4GKAF@8782|Aves	33208|Metazoa	C	tRNA wybutosine-synthesizing protein 1	TYW1	.	4.1.3.44	ko:K15449	.	.	.	.	ko00000,ko01000,ko03016	.	.	.	Flavodoxin_1,Radical_SAM,Wyosine_form	.	.	gi|2451486265|ref|XM_053995428.1|;96.52;2816;90;3;54;2861;166;2981;0;4650;PREDICTED: Vidua macroura S-adenosyl-L-methionine-dependent tRNA 4-demethylwyosine synthase TYW1-like (LOC128817159), transcript variant X6, mRNA
NonamEVm002808t3	NonamEVm002808	TYW1_MOUSE^TYW1_MOUSE^Q:1408-2466,H:369-721^82.4%ID^E:5.76e-216^RecName: Full=S-adenosyl-L-methionine-dependent tRNA 4-demethylwyosine synthase TYW1;^Eukaryota; Metazoa; Chordata; Craniata; Vertebrata; Euteleostomi; Mammalia; Eutheria; Euarchontoglires; Glires; Rodentia; Myomorpha; Muroidea; Muridae; Murinae; Mus; Mus	.	NonamEVm002808t3.p1	212-1369[+]	TYW1_HUMAN^TYW1_HUMAN^Q:2-376,H:6-393^58.9%ID^E:5.07e-144^RecName: Full=S-adenosyl-L-methionine-dependent tRNA 4-demethylwyosine synthase TYW1;^Eukaryota; Metazoa; Chordata; Craniata; Vertebrata; Euteleostomi; Mammalia; Eutheria; Euarchontoglires; Primates; Haplorrhini; Catarrhini; Hominidae; Homo	XP_031362286.1^XP_031362286.1^Q:1408-2466,H:168-520^99.7%ID^E:1.9e-255^.^.	XP_041280982.1^XP_041280982.1^Q:1-376,H:1-376^92.6%ID^E:1.91e-245^.^.	PF00258.30^Flavodoxin_1^NULL^82-233^E:2.2e-27	.	TMRs:PredHel=1^Topology=i13-35o	.	KEGG:hsa:55253	GO:0051539^molecular_function^4 iron, 4 sulfur cluster binding`GO:0010181^molecular_function^FMN binding`GO:0046872^molecular_function^metal ion binding`GO:0102521^molecular_function^tRNA-4-demethylwyosine synthase activity`GO:0031591^biological_process^wybutosine biosynthetic process	GO:0051539^molecular_function^4 iron, 4 sulfur cluster binding`GO:0010181^molecular_function^FMN binding`GO:0046872^molecular_function^metal ion binding`GO:0102521^molecular_function^tRNA-4-demethylwyosine synthase activity`GO:0031591^biological_process^wybutosine biosynthetic process	GO:0010181^molecular_function^FMN binding	181119.XP_005526043.1	2.04e-239	676.0	COG0731@1|root,KOG1160@2759|Eukaryota,38C7H@33154|Opisthokonta,3BD3N@33208|Metazoa,3CYJS@33213|Bilateria,486FF@7711|Chordata,494DW@7742|Vertebrata,4GKAF@8782|Aves	33208|Metazoa	C	tRNA wybutosine-synthesizing protein 1	TYW1	.	4.1.3.44	ko:K15449	.	.	.	.	ko00000,ko01000,ko03016	.	.	.	Flavodoxin_1,Radical_SAM,Wyosine_form	.	.	gi|1772564122|ref|XM_031506426.1|;97.678;1852;41;2;1406;3256;582;2432;0;3181;PREDICTED: Lonchura striata domestica tRNA-yW synthesizing protein 1 homolog (TYW1), transcript variant X2, mRNA
NonamEVm003696t1	NonamEVm003696	IFT74_HUMAN^IFT74_HUMAN^Q:91-1884,H:1-596^57.5%ID^E:6.91e-185^RecName: Full=Intraflagellar transport protein 74 homolog;^Eukaryota; Metazoa; Chordata; Craniata; Vertebrata; Euteleostomi; Mammalia; Eutheria; Euarchontoglires; Primates; Haplorrhini; Catarrhini; Hominidae; Homo	.	NonamEVm003696t1.p1	91-1896[+]	IFT74_HUMAN^IFT74_HUMAN^Q:1-596,H:1-594^58%ID^E:1.86e-189^RecName: Full=Intraflagellar transport protein 74 homolog;^Eukaryota; Metazoa; Chordata; Craniata; Vertebrata; Euteleostomi; Mammalia; Eutheria; Euarchontoglires; Primates; Haplorrhini; Catarrhini; Hominidae; Homo	XP_021391611.1^XP_021391611.1^Q:91-1893,H:1-600^89.4%ID^E:0^.^.	XP_021391611.1^XP_021391611.1^Q:1-601,H:1-600^89.7%ID^E:0^.^.	.	.	.	.	KEGG:hsa:80173	GO:0001669^cellular_component^acrosomal vesicle`GO:0005813^cellular_component^centrosome`GO:0097542^cellular_component^ciliary tip`GO:0005929^cellular_component^cilium`GO:0030992^cellular_component^intraciliary transport particle B`GO:0031514^cellular_component^motile cilium`GO:0005634^cellular_component^nucleus`GO:0048487^molecular_function^beta-tubulin binding`GO:0003682^molecular_function^chro…	GO:0001669^cellular_component^acrosomal vesicle`GO:0005813^cellular_component^centrosome`GO:0097542^cellular_component^ciliary tip`GO:0005929^cellular_component^cilium`GO:0030992^cellular_component^intraciliary transport particle B`GO:0031514^cellular_component^motile cilium`GO:0005634^cellular_component^nucleus`GO:0048487^molecular_function^beta-tubulin binding`GO:0003682^molecular_function^chro…	.	59894.ENSFALP00000007662	1.28e-309	858.0	28JR0@1|root,2QS4E@2759|Eukaryota,394GU@33154|Opisthokonta,3BCKR@33208|Metazoa,3CWRV@33213|Bilateria,486ZH@7711|Chordata,494FM@7742|Vertebrata,4GS5X@8782|Aves	33208|Metazoa	S	Intraflagellar transport protein 74 homolog	IFT74	GO:0002064,GO:0003334,GO:0003674,GO:0003682,GO:0005488,GO:0005515,GO:0005575,GO:0005622,GO:0005623,GO:0005634,GO:0005813,GO:0005815,GO:0005856,GO:0005929,GO:0006355,GO:0006357,GO:0006810,GO:0006928,GO:0006996,GO:0007017,GO:0007018,GO:0007154,GO:0007165,GO:0007166,GO:0007219,GO:0007275,GO:0007368,GO:0007389,GO:0007507,GO:0008092,GO:0008150,GO:0008285,GO:0008544,GO:0009799,GO:0009855,GO:0009888,GO:…	.	ko:K19679	.	.	.	.	ko00000,ko03036	.	.	.	.	.	.	gi|1772585581|ref|XM_021535936.2|;96.13;3101;107;6;1;3094;94;3188;0;5049;PREDICTED: Lonchura striata domestica intraflagellar transport 74 (IFT74), transcript variant X1, mRNA
NonamEVm003696t2	NonamEVm003696	IFT74_HUMAN^IFT74_HUMAN^Q:73-1665,H:1-596^50.4%ID^E:1.12e-152^RecName: Full=Intraflagellar transport protein 74 homolog;^Eukaryota; Metazoa; Chordata; Craniata; Vertebrata; Euteleostomi; Mammalia; Eutheria; Euarchontoglires; Primates; Haplorrhini; Catarrhini; Hominidae; Homo	.	NonamEVm003696t2.p1	73-1677[+]	IFT74_HUMAN^IFT74_HUMAN^Q:1-529,H:1-594^50.8%ID^E:9.46e-153^RecName: Full=Intraflagellar transport protein 74 homolog;^Eukaryota; Metazoa; Chordata; Craniata; Vertebrata; Euteleostomi; Mammalia; Eutheria; Euarchontoglires; Primates; Haplorrhini; Catarrhini; Hominidae; Homo	XP_021391612.1^XP_021391612.1^Q:73-1674,H:1-598^79.4%ID^E:1.25e-290^.^.	XP_021391612.1^XP_021391612.1^Q:1-534,H:1-598^79.8%ID^E:4.09e-292^.^.	.	.	.	.	KEGG:hsa:80173	GO:0001669^cellular_component^acrosomal vesicle`GO:0005813^cellular_component^centrosome`GO:0097542^cellular_component^ciliary tip`GO:0005929^cellular_component^cilium`GO:0030992^cellular_component^intraciliary transport particle B`GO:0031514^cellular_component^motile cilium`GO:0005634^cellular_component^nucleus`GO:0048487^molecular_function^beta-tubulin binding`GO:0003682^molecular_function^chro…	GO:0001669^cellular_component^acrosomal vesicle`GO:0005813^cellular_component^centrosome`GO:0097542^cellular_component^ciliary tip`GO:0005929^cellular_component^cilium`GO:0030992^cellular_component^intraciliary transport particle B`GO:0031514^cellular_component^motile cilium`GO:0005634^cellular_component^nucleus`GO:0048487^molecular_function^beta-tubulin binding`GO:0003682^molecular_function^chro…	.	59894.ENSFALP00000007662	9.8e-266	744.0	28JR0@1|root,2QS4E@2759|Eukaryota,394GU@33154|Opisthokonta,3BCKR@33208|Metazoa,3CWRV@33213|Bilateria,486ZH@7711|Chordata,494FM@7742|Vertebrata,4GS5X@8782|Aves	33208|Metazoa	S	Intraflagellar transport protein 74 homolog	IFT74	GO:0002064,GO:0003334,GO:0003674,GO:0003682,GO:0005488,GO:0005515,GO:0005575,GO:0005622,GO:0005623,GO:0005634,GO:0005813,GO:0005815,GO:0005856,GO:0005929,GO:0006355,GO:0006357,GO:0006810,GO:0006928,GO:0006996,GO:0007017,GO:0007018,GO:0007154,GO:0007165,GO:0007166,GO:0007219,GO:0007275,GO:0007368,GO:0007389,GO:0007507,GO:0008092,GO:0008150,GO:0008285,GO:0008544,GO:0009799,GO:0009855,GO:0009888,GO:…	.	ko:K19679	.	.	.	.	ko00000,ko03036	.	.	.	.	.	.	gi|1943008786|ref|XM_038123350.1|;94.308;1634;87;3;47;1677;185;1815;0;2497;PREDICTED: Motacilla alba alba intraflagellar transport 74 (IFT74), transcript variant X4, mRNA
NonamEVm003704t1	NonamEVm003704	JAK3_HUMAN^JAK3_HUMAN^Q:8-1798,H:508-1101^66.3%ID^E:1.71e-278^RecName: Full=Tyrosine-protein kinase JAK3 {ECO:0000305};^Eukaryota; Metazoa; Chordata; Craniata; Vertebrata; Euteleostomi; Mammalia; Eutheria; Euarchontoglires; Primates; Haplorrhini; Catarrhini; Hominidae; Homo	.	NonamEVm003704t1.p1	17-1819[+]	JAK3_HUMAN^JAK3_HUMAN^Q:1-594,H:511-1101^66.3%ID^E:3.74e-280^RecName: Full=Tyrosine-protein kinase JAK3 {ECO:0000305};^Eukaryota; Metazoa; Chordata; Craniata; Vertebrata; Euteleostomi; Mammalia; Eutheria; Euarchontoglires; Primates; Haplorrhini; Catarrhini; Hominidae; Homo	XP_036255292.1^XP_036255292.1^Q:2-1816,H:510-1114^96%ID^E:0^.^.	XP_036255292.1^XP_036255292.1^Q:1-600,H:515-1114^96%ID^E:0^.^.	PF07714.22^PK_Tyr_Ser-Thr^NULL^12-270^E:1.3e-55`PF00069.30^Pkinase^NULL^13-267^E:2.8e-19`PF07714.22^PK_Tyr_Ser-Thr^NULL^316-586^E:2.4e-79`PF00069.30^Pkinase^NULL^318-584^E:2.5e-48	.	.	.	KEGG:hsa:3718	GO:0005856^cellular_component^cytoskeleton`GO:0005829^cellular_component^cytosol`GO:0005768^cellular_component^endosome`GO:0031234^cellular_component^extrinsic component of cytoplasmic side of plasma membrane`GO:0019897^cellular_component^extrinsic component of plasma membrane`GO:0005886^cellular_component^plasma membrane`GO:0005524^molecular_function^ATP binding`GO:0005131^molecular_function^gro…	GO:0005856^cellular_component^cytoskeleton`GO:0005829^cellular_component^cytosol`GO:0005768^cellular_component^endosome`GO:0031234^cellular_component^extrinsic component of cytoplasmic side of plasma membrane`GO:0019897^cellular_component^extrinsic component of plasma membrane`GO:0005886^cellular_component^plasma membrane`GO:0005524^molecular_function^ATP binding`GO:0005131^molecular_function^gro…	GO:0004672^molecular_function^protein kinase activity`GO:0006468^biological_process^protein phosphorylation`GO:0005524^molecular_function^ATP binding	181119.XP_005531318.1	0.0	1108.0	COG0515@1|root,KOG0197@2759|Eukaryota,38D4Q@33154|Opisthokonta,3BBF4@33208|Metazoa,3CX38@33213|Bilateria,47ZWS@7711|Chordata,493WM@7742|Vertebrata,4GPCS@8782|Aves	33208|Metazoa	T	tyrosine-protein kinase JAK3	JAK3	GO:0000003,GO:0000165,GO:0000902,GO:0000904,GO:0001654,GO:0001667,GO:0001672,GO:0001736,GO:0001738,GO:0001745,GO:0001751,GO:0001754,GO:0001775,GO:0001776,GO:0001817,GO:0001818,GO:0002009,GO:0002064,GO:0002065,GO:0002066,GO:0002164,GO:0002165,GO:0002252,GO:0002260,GO:0002262,GO:0002376,GO:0002520,GO:0002521,GO:0002682,GO:0002683,GO:0002684,GO:0002694,GO:0002695,GO:0002696,GO:0002697,GO:0002698,GO:…	2.7.10.2,3.1.3.16,3.1.3.48	ko:K04447,ko:K11217,ko:K11218,ko:K14165	ko01521,ko04062,ko04151,ko04217,ko04380,ko04550,ko04621,ko04630,ko04658,ko04659,ko04725,ko04917,ko04920,ko04933,ko05140,ko05145,ko05152,ko05160,ko05161,ko05162,ko05164,ko05165,ko05166,ko05167,ko05168,ko05169,ko05200,ko05203,ko05212,ko05223,map01521,map04062,map04151,map04217,map04380,map04550,map04621,map04630,map04658,map04659,map04725,map04917,map04920,map04933,map05140,map05145,map05152,map051…	M00684	.	.	ko00000,ko00001,ko00002,ko01000,ko01001,ko01009	.	.	.	Pkinase_Tyr,SH2	.	.	gi|2451502766|ref|XM_053999374.1|;96.728;1895;62;0;1;1895;1574;3468;0;3157;PREDICTED: Vidua macroura Janus kinase 3 (JAK3), transcript variant X5, mRNA
NonamEVm003779t1	NonamEVm003779	.	.	NonamEVm003779t1.p1	1-1776[+]	.	.	.	.	.	TMRs:PredHel=21^Topology=i7-29o33-55i62-84o88-110i117-139o143-165i172-194o198-220i227-249o259-281i288-310o314-336i343-365o369-391i398-420o430-452i459-481o485-507i514-536o540-562i569-591o	.	.	.	.	.	.	.	.	.	.	.	.	.	.	.	.	.	.	.	.	.	.	.	.	.	.	.	.
NonamEVm004268t1	NonamEVm004268	ABHGA_HUMAN^ABHGA_HUMAN^Q:39-1670,H:1-558^65.4%ID^E:1.76e-269^RecName: Full=Phosphatidylserine lipase ABHD16A {ECO:0000305};^Eukaryota; Metazoa; Chordata; Craniata; Vertebrata; Euteleostomi; Mammalia; Eutheria; Euarchontoglires; Primates; Haplorrhini; Catarrhini; Hominidae; Homo	.	NonamEVm004268t1.p1	39-1673[+]	ABHGA_HUMAN^ABHGA_HUMAN^Q:1-544,H:1-558^65.4%ID^E:3.55e-270^RecName: Full=Phosphatidylserine lipase ABHD16A {ECO:0000305};^Eukaryota; Metazoa; Chordata; Craniata; Vertebrata; Euteleostomi; Mammalia; Eutheria; Euarchontoglires; Primates; Haplorrhini; Catarrhini; Hominidae; Homo	XP_031950209.1^XP_031950209.1^Q:39-1670,H:1-555^86.8%ID^E:0^.^.	XP_031950209.1^XP_031950209.1^Q:1-544,H:1-555^86.8%ID^E:0^.^.	PF22990.1^ABHD16_N^NULL^3-144^E:5.9e-38`PF00561.25^Abhydrolase_1^NULL^267-385^E:6.1e-11	.	TMRs:PredHel=2^Topology=o52-74i87-109o	.	KEGG:hsa:7920	GO:0012505^cellular_component^endomembrane system`GO:0016020^cellular_component^membrane`GO:0047372^molecular_function^acylglycerol lipase activity`GO:0004620^molecular_function^phospholipase activity`GO:0052651^biological_process^monoacylglycerol catabolic process`GO:0006660^biological_process^phosphatidylserine catabolic process`GO:1905344^biological_process^prostaglandin catabolic process	GO:0012505^cellular_component^endomembrane system`GO:0016020^cellular_component^membrane`GO:0047372^molecular_function^acylglycerol lipase activity`GO:0004620^molecular_function^phospholipase activity`GO:0052651^biological_process^monoacylglycerol catabolic process`GO:0006660^biological_process^phosphatidylserine catabolic process`GO:1905344^biological_process^prostaglandin catabolic process	.	8496.XP_006276591.1	6.82e-282	783.0	KOG1553@1|root,KOG1553@2759|Eukaryota,38GEC@33154|Opisthokonta,3BDIU@33208|Metazoa,3CRQ1@33213|Bilateria,480HA@7711|Chordata,497WB@7742|Vertebrata	33208|Metazoa	S	prostaglandin catabolic process	ABHD16A	GO:0003674,GO:0003824,GO:0006082,GO:0006629,GO:0006631,GO:0006638,GO:0006639,GO:0006690,GO:0006692,GO:0006693,GO:0008150,GO:0008152,GO:0009056,GO:0009062,GO:0009987,GO:0016042,GO:0016054,GO:0016298,GO:0016787,GO:0016788,GO:0019752,GO:0032787,GO:0033559,GO:0043436,GO:0044237,GO:0044238,GO:0044242,GO:0044248,GO:0044255,GO:0044281,GO:0044282,GO:0046395,GO:0046461,GO:0046462,GO:0046464,GO:0046486,GO:…	.	.	.	.	.	.	.	.	.	.	Abhydrolase_1	.	.	gi|2562700807|ref|XM_058822561.1|;88.954;1702;166;14;13;1694;1;1700;0;2082;PREDICTED: Ammospiza caudacuta abhydrolase domain containing 16A, phospholipase (ABHD16A), transcript variant X2, mRNA
NonamEVm004838t1	NonamEVm004838	PPP5_RAT^PPP5_RAT^Q:7-1497,H:2-499^88.2%ID^E:0^RecName: Full=Serine/threonine-protein phosphatase 5;^Eukaryota; Metazoa; Chordata; Craniata; Vertebrata; Euteleostomi; Mammalia; Eutheria; Euarchontoglires; Glires; Rodentia; Myomorpha; Muroidea; Muridae; Murinae; Rattus	.	NonamEVm004838t1.p1	10-1500[+]	PPP5_RAT^PPP5_RAT^Q:1-496,H:3-499^88.1%ID^E:0^RecName: Full=Serine/threonine-protein phosphatase 5;^Eukaryota; Metazoa; Chordata; Craniata; Vertebrata; Euteleostomi; Mammalia; Eutheria; Euarchontoglires; Glires; Rodentia; Myomorpha; Muroidea; Muridae; Murinae; Rattus	XP_032939778.1^XP_032939778.1^Q:10-1497,H:1-498^96.4%ID^E:0^.^.	XP_032939778.1^XP_032939778.1^Q:1-496,H:1-498^96.4%ID^E:0^.^.	PF08238.17^Sel1^NULL^39-55^E:0.46`PF08238.17^Sel1^NULL^96-102^E:450`PF08321.17^PPP5^NULL^133-225^E:1e-33`PF00149.33^Metallophos^NULL^233-428^E:6.1e-40`PF08238.17^Sel1^NULL^456-471^E:48	.	.	.	KEGG:rno:65179	GO:0005829^cellular_component^cytosol`GO:0043025^cellular_component^neuronal cell body`GO:0005634^cellular_component^nucleus`GO:0043204^cellular_component^perikaryon`GO:0005886^cellular_component^plasma membrane`GO:0101031^cellular_component^protein folding chaperone complex`GO:0032991^cellular_component^protein-containing complex`GO:1990635^cellular_component^proximal dendrite`GO:0043531^molecul…	GO:0005829^cellular_component^cytosol`GO:0043025^cellular_component^neuronal cell body`GO:0005634^cellular_component^nucleus`GO:0043204^cellular_component^perikaryon`GO:0005886^cellular_component^plasma membrane`GO:0101031^cellular_component^protein folding chaperone complex`GO:0032991^cellular_component^protein-containing complex`GO:1990635^cellular_component^proximal dendrite`GO:0043531^molecul…	GO:0016787^molecular_function^hydrolase activity	8496.XP_006277881.1	0.0	927.0	COG0639@1|root,KOG0376@2759|Eukaryota,38E0Z@33154|Opisthokonta,3BCC5@33208|Metazoa,3CRPX@33213|Bilateria,489CQ@7711|Chordata,494G4@7742|Vertebrata	33208|Metazoa	K	phosphatase 5	PPP5C	GO:0000165,GO:0000166,GO:0000278,GO:0000302,GO:0001101,GO:0001932,GO:0001933,GO:0001965,GO:0003674,GO:0003676,GO:0003723,GO:0003824,GO:0004721,GO:0004722,GO:0005488,GO:0005515,GO:0005524,GO:0005575,GO:0005622,GO:0005623,GO:0005634,GO:0005654,GO:0005737,GO:0005819,GO:0005829,GO:0005856,GO:0006139,GO:0006325,GO:0006351,GO:0006464,GO:0006468,GO:0006470,GO:0006725,GO:0006793,GO:0006796,GO:0006807,GO:…	3.1.3.16	ko:K04460,ko:K11800	ko04010,map04010	.	.	.	ko00000,ko00001,ko01000,ko01009,ko04121	.	.	.	Metallophos,PPP5,TPR_1,TPR_8	.	.	gi|2451413119|ref|XM_053969641.1|;93.32;2006;71;31;1;1962;18;2004;0;2904;PREDICTED: Vidua macroura protein phosphatase 5 catalytic subunit (PPP5C), transcript variant X2, mRNA
NonamEVm005322t1	NonamEVm005322	NSUN5_HUMAN^NSUN5_HUMAN^Q:4-1269,H:1-424^65.4%ID^E:3.12e-183^RecName: Full=28S rRNA (cytosine-C(5))-methyltransferase {ECO:0000305};^Eukaryota; Metazoa; Chordata; Craniata; Vertebrata; Euteleostomi; Mammalia; Eutheria; Euarchontoglires; Primates; Haplorrhini; Catarrhini; Hominidae; Homo	.	NonamEVm005322t1.p1	4-1401[+]	NSUN5_HUMAN^NSUN5_HUMAN^Q:1-422,H:1-424^65.4%ID^E:1.31e-184^RecName: Full=28S rRNA (cytosine-C(5))-methyltransferase {ECO:0000305};^Eukaryota; Metazoa; Chordata; Craniata; Vertebrata; Euteleostomi; Mammalia; Eutheria; Euarchontoglires; Primates; Haplorrhini; Catarrhini; Hominidae; Homo	OWK52504.1^OWK52504.1^Q:4-1398,H:1-464^97%ID^E:1.98000000000753e-313^.^.	OWK52504.1^OWK52504.1^Q:1-465,H:1-464^97%ID^E:1.3799999999798e-313^.^.	PF21153.2^NSUN5_N^NULL^34-121^E:1.1e-36`PF21148.2^NSUN5_fdxn-like^NULL^134-211^E:2.3e-37`PF01189.22^Methyltr_RsmB-F^NULL^220-420^E:2.1e-32	.	.	.	KEGG:hsa:55695	GO:0005730^cellular_component^nucleolus`GO:0005654^cellular_component^nucleoplasm`GO:0003723^molecular_function^RNA binding`GO:0009383^molecular_function^rRNA (cytosine-C5-)-methyltransferase activity`GO:0021987^biological_process^cerebral cortex development`GO:0050890^biological_process^cognition`GO:0022038^biological_process^corpus callosum development`GO:0014003^biological_process^oligodendroc…	GO:0005730^cellular_component^nucleolus`GO:0005654^cellular_component^nucleoplasm`GO:0003723^molecular_function^RNA binding`GO:0009383^molecular_function^rRNA (cytosine-C5-)-methyltransferase activity`GO:0021987^biological_process^cerebral cortex development`GO:0050890^biological_process^cognition`GO:0022038^biological_process^corpus callosum development`GO:0014003^biological_process^oligodendroc…	.	181119.XP_005526054.1	1.07e-301	827.0	COG0144@1|root,KOG2360@2759|Eukaryota,38FAE@33154|Opisthokonta,3B9UB@33208|Metazoa,3CWXH@33213|Bilateria,482J8@7711|Chordata,495VV@7742|Vertebrata,4GNKC@8782|Aves	33208|Metazoa	D	Belongs to the class I-like SAM-binding methyltransferase superfamily. RsmB NOP family	NSUN5	GO:0000154,GO:0001510,GO:0003674,GO:0003824,GO:0005575,GO:0005622,GO:0005623,GO:0005634,GO:0005730,GO:0006139,GO:0006364,GO:0006396,GO:0006725,GO:0006807,GO:0008150,GO:0008152,GO:0008168,GO:0008173,GO:0008757,GO:0009451,GO:0009987,GO:0010467,GO:0016070,GO:0016072,GO:0016740,GO:0016741,GO:0022613,GO:0031167,GO:0031974,GO:0031981,GO:0032259,GO:0034470,GO:0034641,GO:0034660,GO:0042254,GO:0043170,GO:…	2.1.1.311	ko:K15264	.	.	.	.	ko00000,ko01000,ko03009	.	.	.	Methyltr_RsmB-F	.	.	gi|1772564145|ref|XM_021540356.2|;95.244;1745;43;9;3;1710;17;1758;0;2726;PREDICTED: Lonchura striata domestica NOP2/Sun RNA methyltransferase 5 (NSUN5), mRNA
NonamEVm005322t2	NonamEVm005322	NSUN5_MOUSE^NSUN5_MOUSE^Q:2-445,H:276-425^64%ID^E:2.41e-51^RecName: Full=28S rRNA (cytosine-C(5))-methyltransferase {ECO:0000305};^Eukaryota; Metazoa; Chordata; Craniata; Vertebrata; Euteleostomi; Mammalia; Eutheria; Euarchontoglires; Glires; Rodentia; Myomorpha; Muroidea; Muridae; Murinae; Mus; Mus	.	NonamEVm005322t2.p1	2-736[+]	NSUN5_MOUSE^NSUN5_MOUSE^Q:1-148,H:276-425^64%ID^E:4.93e-56^RecName: Full=28S rRNA (cytosine-C(5))-methyltransferase {ECO:0000305};^Eukaryota; Metazoa; Chordata; Craniata; Vertebrata; Euteleostomi; Mammalia; Eutheria; Euarchontoglires; Glires; Rodentia; Myomorpha; Muroidea; Muridae; Murinae; Mus; Mus	NXM13650.1^NXM13650.1^Q:2-499,H:245-410^94.6%ID^E:1.33e-96^.^.	NXM13650.1^NXM13650.1^Q:1-166,H:245-410^94.6%ID^E:4.88e-103^.^.	PF01189.22^Methyltr_RsmB-F^NULL^21-145^E:5.5e-14	.	.	.	KEGG:mmu:100609	GO:0005730^cellular_component^nucleolus`GO:0005654^cellular_component^nucleoplasm`GO:0003723^molecular_function^RNA binding`GO:0009383^molecular_function^rRNA (cytosine-C5-)-methyltransferase activity`GO:0021987^biological_process^cerebral cortex development`GO:0050890^biological_process^cognition`GO:0022038^biological_process^corpus callosum development`GO:0014003^biological_process^oligodendroc…	GO:0005730^cellular_component^nucleolus`GO:0005654^cellular_component^nucleoplasm`GO:0003723^molecular_function^RNA binding`GO:0009383^molecular_function^rRNA (cytosine-C5-)-methyltransferase activity`GO:0021987^biological_process^cerebral cortex development`GO:0050890^biological_process^cognition`GO:0022038^biological_process^corpus callosum development`GO:0014003^biological_process^oligodendroc…	.	181119.XP_005526054.1	5.26e-99	303.0	COG0144@1|root,KOG2360@2759|Eukaryota,38FAE@33154|Opisthokonta,3B9UB@33208|Metazoa,3CWXH@33213|Bilateria,482J8@7711|Chordata,495VV@7742|Vertebrata,4GNKC@8782|Aves	33208|Metazoa	D	Belongs to the class I-like SAM-binding methyltransferase superfamily. RsmB NOP family	NSUN5	GO:0000154,GO:0001510,GO:0003674,GO:0003824,GO:0005575,GO:0005622,GO:0005623,GO:0005634,GO:0005730,GO:0006139,GO:0006364,GO:0006396,GO:0006725,GO:0006807,GO:0008150,GO:0008152,GO:0008168,GO:0008173,GO:0008757,GO:0009451,GO:0009987,GO:0010467,GO:0016070,GO:0016072,GO:0016740,GO:0016741,GO:0022613,GO:0031167,GO:0031974,GO:0031981,GO:0032259,GO:0034470,GO:0034641,GO:0034660,GO:0042254,GO:0043170,GO:…	2.1.1.311	ko:K15264	.	.	.	.	ko00000,ko01000,ko03009	.	.	.	Methyltr_RsmB-F	.	.	gi|1993866094|ref|XM_039732875.1|;87.283;1612;130;29;569;2135;1467;3048;0;1772;PREDICTED: Passer montanus NOP2/Sun RNA methyltransferase 5 (NSUN5), transcript variant X3, mRNA
NonamEVm005322t3	NonamEVm005322	NSUN5_MOUSE^NSUN5_MOUSE^Q:1-342,H:310-425^64.7%ID^E:1.11e-37^RecName: Full=28S rRNA (cytosine-C(5))-methyltransferase {ECO:0000305};^Eukaryota; Metazoa; Chordata; Craniata; Vertebrata; Euteleostomi; Mammalia; Eutheria; Euarchontoglires; Glires; Rodentia; Myomorpha; Muroidea; Muridae; Murinae; Mus; Mus	.	NonamEVm005322t3.p1	10-573[+]	NSUN5_MOUSE^NSUN5_MOUSE^Q:9-111,H:323-425^67%ID^E:1.93e-37^RecName: Full=28S rRNA (cytosine-C(5))-methyltransferase {ECO:0000305};^Eukaryota; Metazoa; Chordata; Craniata; Vertebrata; Euteleostomi; Mammalia; Eutheria; Euarchontoglires; Glires; Rodentia; Myomorpha; Muroidea; Muridae; Murinae; Mus; Mus	NXM13650.1^NXM13650.1^Q:1-420,H:279-419^89.4%ID^E:2.55e-74^.^.	NXM13650.1^NXM13650.1^Q:1-137,H:282-419^89.1%ID^E:7.74e-74^.^.	PF01189.22^Methyltr_RsmB-F^NULL^39-108^E:1.8e-08	.	.	.	KEGG:mmu:100609	GO:0005730^cellular_component^nucleolus`GO:0005654^cellular_component^nucleoplasm`GO:0003723^molecular_function^RNA binding`GO:0009383^molecular_function^rRNA (cytosine-C5-)-methyltransferase activity`GO:0021987^biological_process^cerebral cortex development`GO:0050890^biological_process^cognition`GO:0022038^biological_process^corpus callosum development`GO:0014003^biological_process^oligodendroc…	GO:0005730^cellular_component^nucleolus`GO:0005654^cellular_component^nucleoplasm`GO:0003723^molecular_function^RNA binding`GO:0009383^molecular_function^rRNA (cytosine-C5-)-methyltransferase activity`GO:0021987^biological_process^cerebral cortex development`GO:0050890^biological_process^cognition`GO:0022038^biological_process^corpus callosum development`GO:0014003^biological_process^oligodendroc…	.	181119.XP_005526054.1	1.2e-70	228.0	COG0144@1|root,KOG2360@2759|Eukaryota,38FAE@33154|Opisthokonta,3B9UB@33208|Metazoa,3CWXH@33213|Bilateria,482J8@7711|Chordata,495VV@7742|Vertebrata,4GNKC@8782|Aves	33208|Metazoa	D	Belongs to the class I-like SAM-binding methyltransferase superfamily. RsmB NOP family	NSUN5	GO:0000154,GO:0001510,GO:0003674,GO:0003824,GO:0005575,GO:0005622,GO:0005623,GO:0005634,GO:0005730,GO:0006139,GO:0006364,GO:0006396,GO:0006725,GO:0006807,GO:0008150,GO:0008152,GO:0008168,GO:0008173,GO:0008757,GO:0009451,GO:0009987,GO:0010467,GO:0016070,GO:0016072,GO:0016740,GO:0016741,GO:0022613,GO:0031167,GO:0031974,GO:0031981,GO:0032259,GO:0034470,GO:0034641,GO:0034660,GO:0042254,GO:0043170,GO:…	2.1.1.311	ko:K15264	.	.	.	.	ko00000,ko01000,ko03009	.	.	.	Methyltr_RsmB-F	.	.	gi|1772564145|ref|XM_021540356.2|;92.308;455;16;4;452;890;1307;1758;5.96e-175;628;PREDICTED: Lonchura striata domestica NOP2/Sun RNA methyltransferase 5 (NSUN5), mRNA
NonamEVm005655t1	NonamEVm005655	TBL2_MOUSE^TBL2_MOUSE^Q:69-1328,H:18-437^62.7%ID^E:6.8e-191^RecName: Full=Transducin beta-like protein 2;^Eukaryota; Metazoa; Chordata; Craniata; Vertebrata; Euteleostomi; Mammalia; Eutheria; Euarchontoglires; Glires; Rodentia; Myomorpha; Muroidea; Muridae; Murinae; Mus; Mus	.	NonamEVm005655t1.p1	18-1346[+]	TBL2_MOUSE^TBL2_MOUSE^Q:19-437,H:19-437^62.8%ID^E:1.29e-191^RecName: Full=Transducin beta-like protein 2;^Eukaryota; Metazoa; Chordata; Craniata; Vertebrata; Euteleostomi; Mammalia; Eutheria; Euarchontoglires; Glires; Rodentia; Myomorpha; Muroidea; Muridae; Murinae; Mus; Mus	XP_021396030.1^XP_021396030.1^Q:18-1343,H:1-442^95.7%ID^E:6.99e-305^.^.	XP_021396030.1^XP_021396030.1^Q:1-442,H:1-442^95.7%ID^E:1.64e-305^.^.	PF00400.37^WD40^NULL^81-116^E:1.9e-14`PF00400.37^WD40^NULL^185-214^E:0.01`PF00400.37^WD40^NULL^271-305^E:1.9e-08`PF00400.37^WD40^NULL^364-394^E:0.0001	.	TMRs:PredHel=1^Topology=i7-29o	.	KEGG:mmu:27368	GO:0005783^cellular_component^endoplasmic reticulum`GO:0051219^molecular_function^phosphoprotein binding`GO:0019901^molecular_function^protein kinase binding`GO:0031369^molecular_function^translation initiation factor binding`GO:0042149^biological_process^cellular response to glucose starvation`GO:0071456^biological_process^cellular response to hypoxia`GO:0030968^biological_process^endoplasmic re…	GO:0005783^cellular_component^endoplasmic reticulum`GO:0051219^molecular_function^phosphoprotein binding`GO:0019901^molecular_function^protein kinase binding`GO:0031369^molecular_function^translation initiation factor binding`GO:0042149^biological_process^cellular response to glucose starvation`GO:0071456^biological_process^cellular response to hypoxia`GO:0030968^biological_process^endoplasmic re…	GO:0005515^molecular_function^protein binding	59894.ENSFALP00000014285	3.45e-292	801.0	COG2319@1|root,KOG2096@2759|Eukaryota,38CTN@33154|Opisthokonta,3BBHV@33208|Metazoa,3CRMH@33213|Bilateria,48996@7711|Chordata,48X9X@7742|Vertebrata,4GJ57@8782|Aves	33208|Metazoa	S	Transducin beta-like	TBL2	GO:0001666,GO:0003674,GO:0005488,GO:0005515,GO:0005575,GO:0005622,GO:0005623,GO:0005737,GO:0005783,GO:0005789,GO:0006950,GO:0006986,GO:0007154,GO:0007165,GO:0008150,GO:0009267,GO:0009605,GO:0009628,GO:0009987,GO:0009991,GO:0010033,GO:0012505,GO:0016020,GO:0016021,GO:0019899,GO:0019900,GO:0019901,GO:0023052,GO:0030176,GO:0030968,GO:0031224,GO:0031227,GO:0031369,GO:0031667,GO:0031668,GO:0031669,GO:…	.	ko:K14570	ko03008,map03008	.	.	.	ko00000,ko00001,ko01000,ko03009	.	.	.	WD40	.	.	gi|1772564312|ref|XM_021540355.2|;96.194;1445;54;1;1;1445;93;1536;0;2362;PREDICTED: Lonchura striata domestica transducin beta like 2 (TBL2), transcript variant X2, mRNA
NonamEVm005655t2	NonamEVm005655	TBL2_MOUSE^TBL2_MOUSE^Q:74-1333,H:18-437^62.7%ID^E:4.05e-191^RecName: Full=Transducin beta-like protein 2;^Eukaryota; Metazoa; Chordata; Craniata; Vertebrata; Euteleostomi; Mammalia; Eutheria; Euarchontoglires; Glires; Rodentia; Myomorpha; Muroidea; Muridae; Murinae; Mus; Mus	.	NonamEVm005655t2.p1	20-1351[+]	TBL2_MOUSE^TBL2_MOUSE^Q:20-438,H:19-437^62.8%ID^E:9.42e-192^RecName: Full=Transducin beta-like protein 2;^Eukaryota; Metazoa; Chordata; Craniata; Vertebrata; Euteleostomi; Mammalia; Eutheria; Euarchontoglires; Glires; Rodentia; Myomorpha; Muroidea; Muridae; Murinae; Mus; Mus	XP_021396030.1^XP_021396030.1^Q:29-1348,H:3-442^95.7%ID^E:9.42e-304^.^.	XP_021396030.1^XP_021396030.1^Q:4-443,H:3-442^95.7%ID^E:5.69e-304^.^.	PF00400.37^WD40^NULL^82-117^E:1.9e-14`PF00400.37^WD40^NULL^186-215^E:0.01`PF00400.37^WD40^NULL^272-306^E:1.9e-08`PF00400.37^WD40^NULL^365-395^E:0.0001	.	TMRs:PredHel=1^Topology=i7-29o	.	KEGG:mmu:27368	GO:0005783^cellular_component^endoplasmic reticulum`GO:0051219^molecular_function^phosphoprotein binding`GO:0019901^molecular_function^protein kinase binding`GO:0031369^molecular_function^translation initiation factor binding`GO:0042149^biological_process^cellular response to glucose starvation`GO:0071456^biological_process^cellular response to hypoxia`GO:0030968^biological_process^endoplasmic re…	GO:0005783^cellular_component^endoplasmic reticulum`GO:0051219^molecular_function^phosphoprotein binding`GO:0019901^molecular_function^protein kinase binding`GO:0031369^molecular_function^translation initiation factor binding`GO:0042149^biological_process^cellular response to glucose starvation`GO:0071456^biological_process^cellular response to hypoxia`GO:0030968^biological_process^endoplasmic re…	GO:0005515^molecular_function^protein binding	181119.XP_005525958.1	2.28e-292	801.0	COG2319@1|root,KOG2096@2759|Eukaryota,38CTN@33154|Opisthokonta,3BBHV@33208|Metazoa,3CRMH@33213|Bilateria,48996@7711|Chordata,48X9X@7742|Vertebrata,4GJ57@8782|Aves	33208|Metazoa	S	Transducin beta-like	TBL2	GO:0001666,GO:0003674,GO:0005488,GO:0005515,GO:0005575,GO:0005622,GO:0005623,GO:0005737,GO:0005783,GO:0005789,GO:0006950,GO:0006986,GO:0007154,GO:0007165,GO:0008150,GO:0009267,GO:0009605,GO:0009628,GO:0009987,GO:0009991,GO:0010033,GO:0012505,GO:0016020,GO:0016021,GO:0019899,GO:0019900,GO:0019901,GO:0023052,GO:0030176,GO:0030968,GO:0031224,GO:0031227,GO:0031369,GO:0031667,GO:0031668,GO:0031669,GO:…	.	ko:K14570	ko03008,map03008	.	.	.	ko00000,ko00001,ko01000,ko03009	.	.	.	WD40	.	.	gi|1772564312|ref|XM_021540355.2|;95.767;1441;57;2;8;1448;98;1534;0;2320;PREDICTED: Lonchura striata domestica transducin beta like 2 (TBL2), transcript variant X2, mRNA
NonamEVm005660t1	NonamEVm005660	PDK2_HUMAN^PDK2_HUMAN^Q:126-1271,H:1-406^83.5%ID^E:4.81e-245^RecName: Full=[Pyruvate dehydrogenase (acetyl-transferring)] kinase isozyme 2, mitochondrial;^Eukaryota; Metazoa; Chordata; Craniata; Vertebrata; Euteleostomi; Mammalia; Eutheria; Euarchontoglires; Primates; Haplorrhini; Catarrhini; Hominidae; Homo	.	NonamEVm005660t1.p1	126-1277[+]	PDK2_HUMAN^PDK2_HUMAN^Q:1-382,H:1-406^83.5%ID^E:3.06e-248^RecName: Full=[Pyruvate dehydrogenase (acetyl-transferring)] kinase isozyme 2, mitochondrial;^Eukaryota; Metazoa; Chordata; Craniata; Vertebrata; Euteleostomi; Mammalia; Eutheria; Euarchontoglires; Primates; Haplorrhini; Catarrhini; Hominidae; Homo	XP_021394162.1^XP_021394162.1^Q:126-1274,H:1-407^94.1%ID^E:1.3e-274^.^.	XP_021394162.1^XP_021394162.1^Q:1-383,H:1-407^94.1%ID^E:7.37e-278^.^.	PF10436.14^BCDHK_Adom3^NULL^30-95^E:1e-15`PF10436.14^BCDHK_Adom3^NULL^88-168^E:2.4e-27`PF02518.31^HATPase_c^NULL^218-337^E:8.6e-14	.	.	.	KEGG:hsa:5164	GO:0005829^cellular_component^cytosol`GO:0005759^cellular_component^mitochondrial matrix`GO:0005967^cellular_component^obsolete mitochondrial pyruvate dehydrogenase complex`GO:0005739^cellular_component^mitochondrion`GO:0005654^cellular_component^nucleoplasm`GO:0045254^cellular_component^pyruvate dehydrogenase complex`GO:0005524^molecular_function^ATP binding`GO:0042803^molecular_function^protein…	GO:0005829^cellular_component^cytosol`GO:0005759^cellular_component^mitochondrial matrix`GO:0005967^cellular_component^obsolete mitochondrial pyruvate dehydrogenase complex`GO:0005739^cellular_component^mitochondrion`GO:0005654^cellular_component^nucleoplasm`GO:0045254^cellular_component^pyruvate dehydrogenase complex`GO:0005524^molecular_function^ATP binding`GO:0042803^molecular_function^protein…	.	181119.XP_005532545.1	6.62e-274	750.0	COG0642@1|root,KOG0787@2759|Eukaryota,38BK5@33154|Opisthokonta,3BCJ1@33208|Metazoa,3CVKG@33213|Bilateria,47YTK@7711|Chordata,48ZCT@7742|Vertebrata,4GQNK@8782|Aves	33208|Metazoa	T	Pyruvate dehydrogenase lipoamide kinase isozyme 2, mitochondrial	PDK2	GO:0000166,GO:0000302,GO:0003674,GO:0003824,GO:0004672,GO:0004674,GO:0004740,GO:0005488,GO:0005515,GO:0005524,GO:0005575,GO:0005622,GO:0005623,GO:0005634,GO:0005654,GO:0005737,GO:0005739,GO:0005759,GO:0005829,GO:0005967,GO:0005975,GO:0005996,GO:0006006,GO:0006082,GO:0006090,GO:0006109,GO:0006111,GO:0006140,GO:0006464,GO:0006468,GO:0006793,GO:0006796,GO:0006807,GO:0006885,GO:0006915,GO:0006950,GO:…	2.7.11.2	ko:K00898,ko:K12077	ko04066,ko04360,ko05230,map04066,map04360,map05230	.	.	.	ko00000,ko00001,ko01000,ko01001	.	.	.	BCDHK_Adom3,HATPase_c	.	.	gi|1772600094|ref|XM_021538487.2|;95.906;1319;43;7;386;1694;431;1748;0;2126;PREDICTED: Lonchura striata domestica pyruvate dehydrogenase kinase 2 (PDK2), mRNA
NonamEVm005660t2	NonamEVm005660	PDK2_HUMAN^PDK2_HUMAN^Q:134-1351,H:1-406^88.2%ID^E:2.16e-264^RecName: Full=[Pyruvate dehydrogenase (acetyl-transferring)] kinase isozyme 2, mitochondrial;^Eukaryota; Metazoa; Chordata; Craniata; Vertebrata; Euteleostomi; Mammalia; Eutheria; Euarchontoglires; Primates; Haplorrhini; Catarrhini; Hominidae; Homo	.	NonamEVm005660t2.p1	134-1357[+]	PDK2_HUMAN^PDK2_HUMAN^Q:1-406,H:1-406^88.2%ID^E:1.25e-267^RecName: Full=[Pyruvate dehydrogenase (acetyl-transferring)] kinase isozyme 2, mitochondrial;^Eukaryota; Metazoa; Chordata; Craniata; Vertebrata; Euteleostomi; Mammalia; Eutheria; Euarchontoglires; Primates; Haplorrhini; Catarrhini; Hominidae; Homo	XP_021394162.1^XP_021394162.1^Q:134-1354,H:1-407^100%ID^E:1.55e-298^.^.	XP_021394162.1^XP_021394162.1^Q:1-407,H:1-407^100%ID^E:7.95e-302^.^.	PF10436.14^BCDHK_Adom3^NULL^30-192^E:5.7e-53`PF02518.31^HATPase_c^NULL^242-361^E:9.7e-14	.	.	.	KEGG:hsa:5164	GO:0005829^cellular_component^cytosol`GO:0005759^cellular_component^mitochondrial matrix`GO:0005967^cellular_component^obsolete mitochondrial pyruvate dehydrogenase complex`GO:0005739^cellular_component^mitochondrion`GO:0005654^cellular_component^nucleoplasm`GO:0045254^cellular_component^pyruvate dehydrogenase complex`GO:0005524^molecular_function^ATP binding`GO:0042803^molecular_function^protein…	GO:0005829^cellular_component^cytosol`GO:0005759^cellular_component^mitochondrial matrix`GO:0005967^cellular_component^obsolete mitochondrial pyruvate dehydrogenase complex`GO:0005739^cellular_component^mitochondrion`GO:0005654^cellular_component^nucleoplasm`GO:0045254^cellular_component^pyruvate dehydrogenase complex`GO:0005524^molecular_function^ATP binding`GO:0042803^molecular_function^protein…	.	181119.XP_005532545.1	2.05e-297	811.0	COG0642@1|root,KOG0787@2759|Eukaryota,38BK5@33154|Opisthokonta,3BCJ1@33208|Metazoa,3CVKG@33213|Bilateria,47YTK@7711|Chordata,48ZCT@7742|Vertebrata,4GQNK@8782|Aves	33208|Metazoa	T	Pyruvate dehydrogenase lipoamide kinase isozyme 2, mitochondrial	PDK2	GO:0000166,GO:0000302,GO:0003674,GO:0003824,GO:0004672,GO:0004674,GO:0004740,GO:0005488,GO:0005515,GO:0005524,GO:0005575,GO:0005622,GO:0005623,GO:0005634,GO:0005654,GO:0005737,GO:0005739,GO:0005759,GO:0005829,GO:0005967,GO:0005975,GO:0005996,GO:0006006,GO:0006082,GO:0006090,GO:0006109,GO:0006111,GO:0006140,GO:0006464,GO:0006468,GO:0006793,GO:0006796,GO:0006807,GO:0006885,GO:0006915,GO:0006950,GO:…	2.7.11.2	ko:K00898,ko:K12077	ko04066,ko04360,ko05230,map04066,map04360,map05230	.	.	.	ko00000,ko00001,ko01000,ko01001	.	.	.	BCDHK_Adom3,HATPase_c	.	.	gi|1772600094|ref|XM_021538487.2|;95.595;1748;63;10;34;1771;2;1745;0;2789;PREDICTED: Lonchura striata domestica pyruvate dehydrogenase kinase 2 (PDK2), mRNA
NonamEVm005660t3	NonamEVm005660	PDK2_HUMAN^PDK2_HUMAN^Q:4-1371,H:19-406^76.5%ID^E:2.13e-246^RecName: Full=[Pyruvate dehydrogenase (acetyl-transferring)] kinase isozyme 2, mitochondrial;^Eukaryota; Metazoa; Chordata; Craniata; Vertebrata; Euteleostomi; Mammalia; Eutheria; Euarchontoglires; Primates; Haplorrhini; Catarrhini; Hominidae; Homo	.	NonamEVm005660t3.p1	46-1377[+]	PDK2_HUMAN^PDK2_HUMAN^Q:1-442,H:33-406^75.8%ID^E:3.15e-238^RecName: Full=[Pyruvate dehydrogenase (acetyl-transferring)] kinase isozyme 2, mitochondrial;^Eukaryota; Metazoa; Chordata; Craniata; Vertebrata; Euteleostomi; Mammalia; Eutheria; Euarchontoglires; Primates; Haplorrhini; Catarrhini; Hominidae; Homo	XP_021394162.1^XP_021394162.1^Q:1-1374,H:18-407^85.2%ID^E:6.49e-273^.^.	XP_021394162.1^XP_021394162.1^Q:1-443,H:33-407^84.7%ID^E:3.6e-264^.^.	PF10436.14^BCDHK_Adom3^NULL^1-99^E:2.4e-26`PF10436.14^BCDHK_Adom3^NULL^101-228^E:2.3e-40`PF02518.31^HATPase_c^NULL^278-397^E:1.1e-13	.	.	.	KEGG:hsa:5164	GO:0005829^cellular_component^cytosol`GO:0005759^cellular_component^mitochondrial matrix`GO:0005967^cellular_component^obsolete mitochondrial pyruvate dehydrogenase complex`GO:0005739^cellular_component^mitochondrion`GO:0005654^cellular_component^nucleoplasm`GO:0045254^cellular_component^pyruvate dehydrogenase complex`GO:0005524^molecular_function^ATP binding`GO:0042803^molecular_function^protein…	GO:0005829^cellular_component^cytosol`GO:0005759^cellular_component^mitochondrial matrix`GO:0005967^cellular_component^obsolete mitochondrial pyruvate dehydrogenase complex`GO:0005739^cellular_component^mitochondrion`GO:0005654^cellular_component^nucleoplasm`GO:0045254^cellular_component^pyruvate dehydrogenase complex`GO:0005524^molecular_function^ATP binding`GO:0042803^molecular_function^protein…	.	181119.XP_005532545.1	9.19e-260	717.0	COG0642@1|root,KOG0787@2759|Eukaryota,38BK5@33154|Opisthokonta,3BCJ1@33208|Metazoa,3CVKG@33213|Bilateria,47YTK@7711|Chordata,48ZCT@7742|Vertebrata,4GQNK@8782|Aves	33208|Metazoa	T	Pyruvate dehydrogenase lipoamide kinase isozyme 2, mitochondrial	PDK2	GO:0000166,GO:0000302,GO:0003674,GO:0003824,GO:0004672,GO:0004674,GO:0004740,GO:0005488,GO:0005515,GO:0005524,GO:0005575,GO:0005622,GO:0005623,GO:0005634,GO:0005654,GO:0005737,GO:0005739,GO:0005759,GO:0005829,GO:0005967,GO:0005975,GO:0005996,GO:0006006,GO:0006082,GO:0006090,GO:0006109,GO:0006111,GO:0006140,GO:0006464,GO:0006468,GO:0006793,GO:0006796,GO:0006807,GO:0006885,GO:0006915,GO:0006950,GO:…	2.7.11.2	ko:K00898,ko:K12077	ko04066,ko04360,ko05230,map04066,map04360,map05230	.	.	.	ko00000,ko00001,ko01000,ko01001	.	.	.	BCDHK_Adom3,HATPase_c	.	.	gi|1772600094|ref|XM_021538487.2|;96.091;1458;32;8;344;1777;289;1745;0;2353;PREDICTED: Lonchura striata domestica pyruvate dehydrogenase kinase 2 (PDK2), mRNA
NonamEVm005660t4	NonamEVm005660	PDK2_HUMAN^PDK2_HUMAN^Q:147-1364,H:1-406^88.2%ID^E:3.71e-264^RecName: Full=[Pyruvate dehydrogenase (acetyl-transferring)] kinase isozyme 2, mitochondrial;^Eukaryota; Metazoa; Chordata; Craniata; Vertebrata; Euteleostomi; Mammalia; Eutheria; Euarchontoglires; Primates; Haplorrhini; Catarrhini; Hominidae; Homo	.	NonamEVm005660t4.p1	147-1370[+]	PDK2_HUMAN^PDK2_HUMAN^Q:1-406,H:1-406^88.2%ID^E:1.25e-267^RecName: Full=[Pyruvate dehydrogenase (acetyl-transferring)] kinase isozyme 2, mitochondrial;^Eukaryota; Metazoa; Chordata; Craniata; Vertebrata; Euteleostomi; Mammalia; Eutheria; Euarchontoglires; Primates; Haplorrhini; Catarrhini; Hominidae; Homo	XP_021394162.1^XP_021394162.1^Q:147-1367,H:1-407^100%ID^E:3.79e-298^.^.	XP_021394162.1^XP_021394162.1^Q:1-407,H:1-407^100%ID^E:7.95e-302^.^.	PF10436.14^BCDHK_Adom3^NULL^30-192^E:5.7e-53`PF02518.31^HATPase_c^NULL^242-361^E:9.8e-14	.	.	.	KEGG:hsa:5164	GO:0005829^cellular_component^cytosol`GO:0005759^cellular_component^mitochondrial matrix`GO:0005967^cellular_component^obsolete mitochondrial pyruvate dehydrogenase complex`GO:0005739^cellular_component^mitochondrion`GO:0005654^cellular_component^nucleoplasm`GO:0045254^cellular_component^pyruvate dehydrogenase complex`GO:0005524^molecular_function^ATP binding`GO:0042803^molecular_function^protein…	GO:0005829^cellular_component^cytosol`GO:0005759^cellular_component^mitochondrial matrix`GO:0005967^cellular_component^obsolete mitochondrial pyruvate dehydrogenase complex`GO:0005739^cellular_component^mitochondrion`GO:0005654^cellular_component^nucleoplasm`GO:0045254^cellular_component^pyruvate dehydrogenase complex`GO:0005524^molecular_function^ATP binding`GO:0042803^molecular_function^protein…	.	181119.XP_005532545.1	2.05e-297	811.0	COG0642@1|root,KOG0787@2759|Eukaryota,38BK5@33154|Opisthokonta,3BCJ1@33208|Metazoa,3CVKG@33213|Bilateria,47YTK@7711|Chordata,48ZCT@7742|Vertebrata,4GQNK@8782|Aves	33208|Metazoa	T	Pyruvate dehydrogenase lipoamide kinase isozyme 2, mitochondrial	PDK2	GO:0000166,GO:0000302,GO:0003674,GO:0003824,GO:0004672,GO:0004674,GO:0004740,GO:0005488,GO:0005515,GO:0005524,GO:0005575,GO:0005622,GO:0005623,GO:0005634,GO:0005654,GO:0005737,GO:0005739,GO:0005759,GO:0005829,GO:0005967,GO:0005975,GO:0005996,GO:0006006,GO:0006082,GO:0006090,GO:0006109,GO:0006111,GO:0006140,GO:0006464,GO:0006468,GO:0006793,GO:0006796,GO:0006807,GO:0006885,GO:0006915,GO:0006950,GO:…	2.7.11.2	ko:K00898,ko:K12077	ko04066,ko04360,ko05230,map04066,map04360,map05230	.	.	.	ko00000,ko00001,ko01000,ko01001	.	.	.	BCDHK_Adom3,HATPase_c	.	.	gi|1772600094|ref|XM_021538487.2|;96.739;1748;48;6;47;1788;1;1745;0;2904;PREDICTED: Lonchura striata domestica pyruvate dehydrogenase kinase 2 (PDK2), mRNA
NonamEVm005729t1	NonamEVm005729	TRI39_MOUSE^TRI39_MOUSE^Q:6-1271,H:64-481^45.8%ID^E:4.17e-109^RecName: Full=E3 ubiquitin-protein ligase TRIM39;^Eukaryota; Metazoa; Chordata; Craniata; Vertebrata; Euteleostomi; Mammalia; Eutheria; Euarchontoglires; Glires; Rodentia; Myomorpha; Muroidea; Muridae; Murinae; Mus; Mus	.	NonamEVm005729t1.p1	3-1316[+]	TRI39_MOUSE^TRI39_MOUSE^Q:2-428,H:64-486^45.5%ID^E:7.36e-111^RecName: Full=E3 ubiquitin-protein ligase TRIM39;^Eukaryota; Metazoa; Chordata; Craniata; Vertebrata; Euteleostomi; Mammalia; Eutheria; Euarchontoglires; Glires; Rodentia; Myomorpha; Muroidea; Muridae; Murinae; Mus; Mus	XP_021396035.1^XP_021396035.1^Q:3-1313,H:54-490^96.8%ID^E:4.29e-300^.^.	XP_021396035.1^XP_021396035.1^Q:1-437,H:54-490^96.8%ID^E:3.19e-302^.^.	PF00643.29^zf-B_box^NULL^47-85^E:4.9e-12`PF13765.12^PRY^NULL^250-300^E:1.9e-17`PF00622.34^SPRY^NULL^304-411^E:1.3e-25	.	.	.	KEGG:mmu:79263	GO:0005737^cellular_component^cytoplasm`GO:0005829^cellular_component^cytosol`GO:0005739^cellular_component^mitochondrion`GO:0005634^cellular_component^nucleus`GO:0061630^molecular_function^ubiquitin protein ligase activity`GO:0008270^molecular_function^zinc ion binding`GO:0006915^biological_process^apoptotic process`GO:0007095^biological_process^mitotic G2 DNA damage checkpoint signaling`GO:0043…	GO:0005737^cellular_component^cytoplasm`GO:0005829^cellular_component^cytosol`GO:0005739^cellular_component^mitochondrion`GO:0005634^cellular_component^nucleus`GO:0061630^molecular_function^ubiquitin protein ligase activity`GO:0008270^molecular_function^zinc ion binding`GO:0006915^biological_process^apoptotic process`GO:0007095^biological_process^mitotic G2 DNA damage checkpoint signaling`GO:0043…	GO:0008270^molecular_function^zinc ion binding`GO:0005515^molecular_function^protein binding	59894.ENSFALP00000014308	1.72e-289	795.0	KOG2177@1|root,KOG2177@2759|Eukaryota,38C4M@33154|Opisthokonta,3BDNZ@33208|Metazoa,3CWUT@33213|Bilateria,480HC@7711|Chordata,48V6T@7742|Vertebrata,4GR6G@8782|Aves	33208|Metazoa	O	PRY	RNF39	.	2.3.2.27,2.7.7.6	ko:K03006,ko:K04617,ko:K10651,ko:K12000,ko:K12009,ko:K12012,ko:K12015	ko00230,ko00240,ko01100,ko03020,ko04080,ko05016,ko05168,ko05169,ko05322,map00230,map00240,map01100,map03020,map04080,map05016,map05168,map05169,map05322	M00180	R00435,R00441,R00442,R00443	RC02795	br01611,ko00000,ko00001,ko00002,ko01000,ko03019,ko03021,ko03400,ko04030,ko04121,ko04131	.	.	.	PRY,SPRY,zf-B_box,zf-C3HC4,zf-C3HC4_4,zf-RING_UBOX	.	.	gi|1772564310|ref|XM_021540360.2|;96.053;1672;52;2;1;1659;343;2013;0;2710;PREDICTED: Lonchura striata domestica E3 ubiquitin-protein ligase TRIM39 (LOC110475882), mRNA
NonamEVm005729t2	NonamEVm005729	TRI39_MOUSE^TRI39_MOUSE^Q:44-835,H:106-365^42.3%ID^E:3.62e-44^RecName: Full=E3 ubiquitin-protein ligase TRIM39;^Eukaryota; Metazoa; Chordata; Craniata; Vertebrata; Euteleostomi; Mammalia; Eutheria; Euarchontoglires; Glires; Rodentia; Myomorpha; Muroidea; Muridae; Murinae; Mus; Mus	.	NonamEVm005729t2.p1	2-931[+]	TRI39_MOUSE^TRI39_MOUSE^Q:15-278,H:106-365^42.3%ID^E:2.63e-46^RecName: Full=E3 ubiquitin-protein ligase TRIM39;^Eukaryota; Metazoa; Chordata; Craniata; Vertebrata; Euteleostomi; Mammalia; Eutheria; Euarchontoglires; Glires; Rodentia; Myomorpha; Muroidea; Muridae; Murinae; Mus; Mus	XP_021396035.1^XP_021396035.1^Q:2-835,H:87-360^93.9%ID^E:3.41e-163^.^.	XP_021396035.1^XP_021396035.1^Q:1-278,H:87-360^93.9%ID^E:1.37e-166^.^.	PF00643.29^zf-B_box^NULL^14-52^E:3.1e-12`PF13765.12^PRY^NULL^217-267^E:1.1e-17	.	.	.	KEGG:mmu:79263	GO:0005737^cellular_component^cytoplasm`GO:0005829^cellular_component^cytosol`GO:0005739^cellular_component^mitochondrion`GO:0005634^cellular_component^nucleus`GO:0061630^molecular_function^ubiquitin protein ligase activity`GO:0008270^molecular_function^zinc ion binding`GO:0006915^biological_process^apoptotic process`GO:0007095^biological_process^mitotic G2 DNA damage checkpoint signaling`GO:0043…	GO:0005737^cellular_component^cytoplasm`GO:0005829^cellular_component^cytosol`GO:0005739^cellular_component^mitochondrion`GO:0005634^cellular_component^nucleus`GO:0061630^molecular_function^ubiquitin protein ligase activity`GO:0008270^molecular_function^zinc ion binding`GO:0006915^biological_process^apoptotic process`GO:0007095^biological_process^mitotic G2 DNA damage checkpoint signaling`GO:0043…	GO:0008270^molecular_function^zinc ion binding	59894.ENSFALP00000014308	1.99e-158	457.0	KOG2177@1|root,KOG2177@2759|Eukaryota,38C4M@33154|Opisthokonta,3BDNZ@33208|Metazoa,3CWUT@33213|Bilateria,480HC@7711|Chordata,48V6T@7742|Vertebrata,4GR6G@8782|Aves	33208|Metazoa	O	PRY	RNF39	.	2.3.2.27,2.7.7.6	ko:K03006,ko:K04617,ko:K10651,ko:K12000,ko:K12009,ko:K12012,ko:K12015	ko00230,ko00240,ko01100,ko03020,ko04080,ko05016,ko05168,ko05169,ko05322,map00230,map00240,map01100,map03020,map04080,map05016,map05168,map05169,map05322	M00180	R00435,R00441,R00442,R00443	RC02795	br01611,ko00000,ko00001,ko00002,ko01000,ko03019,ko03021,ko03400,ko04030,ko04121,ko04131	.	.	.	PRY,SPRY,zf-B_box,zf-C3HC4,zf-C3HC4_4,zf-RING_UBOX	.	.	gi|1772564310|ref|XM_021540360.2|;95.735;1571;51;4;1;1556;443;2012;0;2516;PREDICTED: Lonchura striata domestica E3 ubiquitin-protein ligase TRIM39 (LOC110475882), mRNA
NonamEVm005867t1	NonamEVm005867	DX39B_BOVIN^DX39B_BOVIN^Q:85-1368,H:1-428^99.1%ID^E:2.33e-305^RecName: Full=Spliceosome RNA helicase DDX39B;^Eukaryota; Metazoa; Chordata; Craniata; Vertebrata; Euteleostomi; Mammalia; Eutheria; Laurasiatheria; Artiodactyla; Ruminantia; Pecora; Bovidae; Bovinae; Bos	.	NonamEVm005867t1.p1	85-1371[+]	DX39B_BOVIN^DX39B_BOVIN^Q:1-428,H:1-428^99.1%ID^E:6.25e-306^RecName: Full=Spliceosome RNA helicase DDX39B;^Eukaryota; Metazoa; Chordata; Craniata; Vertebrata; Euteleostomi; Mammalia; Eutheria; Laurasiatheria; Artiodactyla; Ruminantia; Pecora; Bovidae; Bovinae; Bos	XP_037375286.1^XP_037375286.1^Q:85-1368,H:1-428^99.1%ID^E:2.28e-302^.^.	XP_037375286.1^XP_037375286.1^Q:1-428,H:1-428^99.1%ID^E:6.11e-303^.^.	PF00270.34^DEAD^NULL^70-235^E:2.8e-42`PF04851.20^ResIII^NULL^85-232^E:7.4e-10`PF00271.36^Helicase_C^NULL^274-382^E:3.2e-26	.	.	.	KEGG:bta:540191	GO:0005737^cellular_component^cytoplasm`GO:0016607^cellular_component^nuclear speck`GO:0005681^cellular_component^spliceosomal complex`GO:0005524^molecular_function^ATP binding`GO:0016887^molecular_function^ATP hydrolysis activity`GO:0003729^molecular_function^mRNA binding`GO:0003724^molecular_function^RNA helicase activity`GO:0006406^biological_process^mRNA export from nucleus`GO:0000398^biologi…	GO:0005737^cellular_component^cytoplasm`GO:0016607^cellular_component^nuclear speck`GO:0005681^cellular_component^spliceosomal complex`GO:0005524^molecular_function^ATP binding`GO:0016887^molecular_function^ATP hydrolysis activity`GO:0003729^molecular_function^mRNA binding`GO:0003724^molecular_function^RNA helicase activity`GO:0006406^biological_process^mRNA export from nucleus`GO:0000398^biologi…	GO:0003676^molecular_function^nucleic acid binding`GO:0005524^molecular_function^ATP binding`GO:0003677^molecular_function^DNA binding`GO:0016787^molecular_function^hydrolase activity	9940.ENSOARP00000009436	3.44e-304	830.0	COG0513@1|root,KOG0329@2759|Eukaryota,38BRK@33154|Opisthokonta,3B99C@33208|Metazoa,3CVV9@33213|Bilateria,47ZGB@7711|Chordata,490C4@7742|Vertebrata,3J8W8@40674|Mammalia,4IWV0@91561|Cetartiodactyla	33208|Metazoa	A	Involved in nuclear export of spliced and unspliced mRNA. Assembling component of the TREX complex which is thought to couple mRNA transcription, processing and nuclear export, and specifically associates with spliced mRNA and not with unspliced pre-mRNA. TREX is recruited to spliced mRNAs by a transcription- independent mechanism, binds to mRNA upstream of the exon-junction complex (EJC) and is …	DDX39B	GO:0000245,GO:0000346,GO:0000375,GO:0000377,GO:0000398,GO:0001558,GO:0001889,GO:0003674,GO:0003676,GO:0003723,GO:0003724,GO:0003824,GO:0004004,GO:0004386,GO:0005488,GO:0005515,GO:0005575,GO:0005622,GO:0005623,GO:0005634,GO:0005654,GO:0005681,GO:0005730,GO:0005737,GO:0006139,GO:0006355,GO:0006396,GO:0006397,GO:0006403,GO:0006405,GO:0006406,GO:0006417,GO:0006611,GO:0006725,GO:0006807,GO:0006810,GO:…	3.6.4.13	ko:K12812	ko03013,ko03015,ko03040,ko05164,map03013,map03015,map03040,map05164	M00406,M00430	.	.	ko00000,ko00001,ko00002,ko01000,ko03019,ko03041	.	.	.	DEAD,Helicase_C	.	.	gi|2562700815|ref|XM_058822566.1|;94;1450;74;10;40;1487;3;1441;0;2183;PREDICTED: Ammospiza caudacuta spliceosome RNA helicase DDX39B (LOC131570220), mRNA
NonamEVm006192t1	NonamEVm006192	.	.	NonamEVm006192t1.p1	1-1230[+]	.	.	.	.	.	.	.	.	.	.	.	.	.	.	.	.	.	.	.	.	.	.	.	.	.	.	.	.	.	.	.	.	.	gi|2451495752|ref|XM_053968241.1|;86.574;432;26;28;482;895;3712;4129;2.62e-120;448;PREDICTED: Vidua chalybeata tyrosine kinase 2 (TYK2), mRNA
NonamEVm006378t1	NonamEVm006378	RNF43_HUMAN^RNF43_HUMAN^Q:329-1009,H:100-329^67.4%ID^E:9.85e-88^RecName: Full=E3 ubiquitin-protein ligase RNF43;^Eukaryota; Metazoa; Chordata; Craniata; Vertebrata; Euteleostomi; Mammalia; Eutheria; Euarchontoglires; Primates; Haplorrhini; Catarrhini; Hominidae; Homo	.	NonamEVm006378t1.p1	317-1510[+]	RNF43_HUMAN^RNF43_HUMAN^Q:5-231,H:100-329^67.4%ID^E:7.12e-94^RecName: Full=E3 ubiquitin-protein ligase RNF43;^Eukaryota; Metazoa; Chordata; Craniata; Vertebrata; Euteleostomi; Mammalia; Eutheria; Euarchontoglires; Primates; Haplorrhini; Catarrhini; Hominidae; Homo	XP_027524791.1^XP_027524791.1^Q:170-2278,H:1-708^56.3%ID^E:1.09e-215^.^.	XP_023795257.1^XP_023795257.1^Q:2-226,H:60-284^98.7%ID^E:2.49e-151^.^.	PF18212.6^ZNRF_3_ecto^NULL^3-94^E:3.8e-41`PF00097.30^zf-C3HC4^NULL^174-214^E:7e-09`PF13923.11^zf-C3HC4_2^NULL^174-214^E:2e-10`PF17123.10^zf-RING_11^NULL^174-201^E:5.4e-11`PF13639.11^zf-RING_2^NULL^174-214^E:2.7e-14`PF13445.11^zf-RING_UBOX^NULL^174-212^E:1.7e-06	.	TMRs:PredHel=1^Topology=o104-123i	.	KEGG:hsa:54894	GO:0005789^cellular_component^endoplasmic reticulum membrane`GO:0005635^cellular_component^nuclear envelope`GO:0005886^cellular_component^plasma membrane`GO:0005109^molecular_function^frizzled binding`GO:0046872^molecular_function^metal ion binding`GO:0061630^molecular_function^ubiquitin protein ligase activity`GO:0004842^molecular_function^ubiquitin-protein transferase activity`GO:0030178^biolog…	GO:0005789^cellular_component^endoplasmic reticulum membrane`GO:0005635^cellular_component^nuclear envelope`GO:0005886^cellular_component^plasma membrane`GO:0005109^molecular_function^frizzled binding`GO:0046872^molecular_function^metal ion binding`GO:0061630^molecular_function^ubiquitin protein ligase activity`GO:0004842^molecular_function^ubiquitin-protein transferase activity`GO:0030178^biolog…	GO:0046872^molecular_function^metal ion binding	181119.XP_005525951.1	7.34e-149	449.0	KOG0800@1|root,KOG0800@2759|Eukaryota,38BAB@33154|Opisthokonta,3BFF8@33208|Metazoa,3CXS5@33213|Bilateria,487AQ@7711|Chordata,4933H@7742|Vertebrata,4GKBI@8782|Aves	33208|Metazoa	O	E3 ubiquitin-protein ligase RNF43	RNF43	GO:0001664,GO:0003674,GO:0003824,GO:0004842,GO:0005102,GO:0005109,GO:0005488,GO:0005515,GO:0005575,GO:0005622,GO:0005623,GO:0005634,GO:0005635,GO:0005737,GO:0005783,GO:0005789,GO:0005886,GO:0005887,GO:0006464,GO:0006508,GO:0006511,GO:0006807,GO:0008150,GO:0008152,GO:0008283,GO:0009056,GO:0009057,GO:0009966,GO:0009968,GO:0009987,GO:0010646,GO:0010648,GO:0012505,GO:0016020,GO:0016021,GO:0016567,GO:…	2.3.2.27	ko:K15694,ko:K16273	.	.	.	.	ko00000,ko01000,ko04121	.	.	.	zf-RING_2	.	.	gi|1210004242|ref|XM_021540387.1|;96.745;2611;77;8;282;2887;676;3283;0;4344;PREDICTED: Lonchura striata domestica ring finger protein 43 (RNF43), mRNA
NonamEVm006428t1	NonamEVm006428	CERS5_HUMAN^CERS5_HUMAN^Q:10-1188,H:1-392^77.5%ID^E:4.2e-219^RecName: Full=Ceramide synthase 5 {ECO:0000305};^Eukaryota; Metazoa; Chordata; Craniata; Vertebrata; Euteleostomi; Mammalia; Eutheria; Euarchontoglires; Primates; Haplorrhini; Catarrhini; Hominidae; Homo	.	NonamEVm006428t1.p1	10-1194[+]	CERS5_HUMAN^CERS5_HUMAN^Q:12-393,H:15-392^79.1%ID^E:1.55e-224^RecName: Full=Ceramide synthase 5 {ECO:0000305};^Eukaryota; Metazoa; Chordata; Craniata; Vertebrata; Euteleostomi; Mammalia; Eutheria; Euarchontoglires; Primates; Haplorrhini; Catarrhini; Hominidae; Homo	XP_021400901.1^XP_021400901.1^Q:10-1191,H:1-394^99.2%ID^E:7.52e-283^.^.	XP_021400901.1^XP_021400901.1^Q:1-394,H:1-394^99.2%ID^E:4.31e-288^.^.	PF00046.34^Homeodomain^NULL^91-135^E:1.6e-07`PF03798.21^TRAM_LAG1_CLN8^NULL^141-334^E:7.9e-52	.	TMRs:PredHel=5^Topology=o43-65i149-168o188-205i273-295o310-332i	.	KEGG:hsa:91012	GO:0005789^cellular_component^endoplasmic reticulum membrane`GO:0003677^molecular_function^DNA binding`GO:0050291^molecular_function^sphingosine N-acyltransferase activity`GO:0046513^biological_process^ceramide biosynthetic process`GO:0014003^biological_process^oligodendrocyte development`GO:0030148^biological_process^sphingolipid biosynthetic process	GO:0005789^cellular_component^endoplasmic reticulum membrane`GO:0003677^molecular_function^DNA binding`GO:0050291^molecular_function^sphingosine N-acyltransferase activity`GO:0046513^biological_process^ceramide biosynthetic process`GO:0014003^biological_process^oligodendrocyte development`GO:0030148^biological_process^sphingolipid biosynthetic process	GO:0003677^molecular_function^DNA binding`GO:0016020^cellular_component^membrane	181119.XP_005532880.1	6.61e-283	773.0	COG5058@1|root,KOG1607@2759|Eukaryota,38BD0@33154|Opisthokonta,3B98K@33208|Metazoa,3CRT6@33213|Bilateria,480M1@7711|Chordata,48VWA@7742|Vertebrata,4GIR1@8782|Aves	33208|Metazoa	U	Ceramide synthase 5	CERS5	GO:0003674,GO:0003824,GO:0005575,GO:0005622,GO:0005623,GO:0005634,GO:0005635,GO:0005637,GO:0005737,GO:0005783,GO:0005789,GO:0006355,GO:0006357,GO:0006629,GO:0006638,GO:0006639,GO:0006641,GO:0006643,GO:0006665,GO:0006672,GO:0006807,GO:0006950,GO:0006984,GO:0006991,GO:0007154,GO:0007165,GO:0007568,GO:0008150,GO:0008152,GO:0008610,GO:0009058,GO:0009889,GO:0009891,GO:0009892,GO:0009893,GO:0009894,GO:…	2.3.1.24	ko:K04710	ko00600,ko01100,ko04071,map00600,map01100,map04071	M00094,M00099	R01496,R06517	RC00004,RC00064	ko00000,ko00001,ko00002,ko01000	.	.	.	Homeobox,TRAM_LAG1_CLN8	.	.	gi|1210013326|ref|XM_021545226.1|;97.749;2266;45;4;1;2264;52;2313;0;3897;PREDICTED: Lonchura striata domestica ceramide synthase 5 (CERS5), transcript variant X2, mRNA
NonamEVm007244t1	NonamEVm007244	GPDA_MOUSE^GPDA_MOUSE^Q:21-1067,H:1-349^79.9%ID^E:2.19e-204^RecName: Full=Glycerol-3-phosphate dehydrogenase [NAD(+)], cytoplasmic;^Eukaryota; Metazoa; Chordata; Craniata; Vertebrata; Euteleostomi; Mammalia; Eutheria; Euarchontoglires; Glires; Rodentia; Myomorpha; Muroidea; Muridae; Murinae; Mus; Mus	.	NonamEVm007244t1.p1	21-1070[+]	GPDA_MOUSE^GPDA_MOUSE^Q:1-349,H:1-349^79.9%ID^E:4.51e-211^RecName: Full=Glycerol-3-phosphate dehydrogenase [NAD(+)], cytoplasmic;^Eukaryota; Metazoa; Chordata; Craniata; Vertebrata; Euteleostomi; Mammalia; Eutheria; Euarchontoglires; Glires; Rodentia; Myomorpha; Muroidea; Muridae; Murinae; Mus; Mus	XP_005496304.2^XP_005496304.2^Q:21-1067,H:1-349^98.9%ID^E:1.81e-245^.^.	XP_005496304.2^XP_005496304.2^Q:1-349,H:1-349^98.9%ID^E:2e-252^.^.	PF01210.28^NAD_Gly3P_dh_N^NULL^5-172^E:4.1e-50`PF07479.19^NAD_Gly3P_dh_C^NULL^195-339^E:1.1e-47	.	.	.	KEGG:mmu:14555	GO:0005829^cellular_component^cytosol`GO:0009331^cellular_component^glycerol-3-phosphate dehydrogenase (FAD) complex`GO:0005739^cellular_component^mitochondrion`GO:0004368^molecular_function^glycerol-3-phosphate dehydrogenase (quinone) activity`GO:0047952^molecular_function^glycerol-3-phosphate dehydrogenase [NAD(P)+] activity`GO:0051287^molecular_function^NAD binding`GO:0042803^molecular_functio…	GO:0005829^cellular_component^cytosol`GO:0009331^cellular_component^glycerol-3-phosphate dehydrogenase (FAD) complex`GO:0005739^cellular_component^mitochondrion`GO:0004368^molecular_function^glycerol-3-phosphate dehydrogenase (quinone) activity`GO:0047952^molecular_function^glycerol-3-phosphate dehydrogenase [NAD(P)+] activity`GO:0051287^molecular_function^NAD binding`GO:0042803^molecular_functio…	GO:0016616^molecular_function^oxidoreductase activity, acting on the CH-OH group of donors, NAD or NADP as acceptor`GO:0051287^molecular_function^NAD binding`GO:0046168^biological_process^glycerol-3-phosphate catabolic process`GO:0047952^molecular_function^glycerol-3-phosphate dehydrogenase [NAD(P)+] activity`GO:0005975^biological_process^carbohydrate metabolic process	181119.XP_005532883.1	2.19e-249	684.0	COG0240@1|root,KOG2711@2759|Eukaryota,38E7F@33154|Opisthokonta,3BCI8@33208|Metazoa,3CVH2@33213|Bilateria,47ZP4@7711|Chordata,48VII@7742|Vertebrata,4GRP5@8782|Aves	33208|Metazoa	C	Glycerol-3-phosphate dehydrogenase NAD( ) , cytoplasmic isoform X1	GPD1	GO:0000166,GO:0003674,GO:0003824,GO:0004367,GO:0004368,GO:0005488,GO:0005575,GO:0005622,GO:0005623,GO:0005737,GO:0005829,GO:0005975,GO:0005996,GO:0006006,GO:0006066,GO:0006067,GO:0006072,GO:0006091,GO:0006094,GO:0006109,GO:0006110,GO:0006116,GO:0006127,GO:0006139,GO:0006140,GO:0006629,GO:0006638,GO:0006639,GO:0006641,GO:0006644,GO:0006650,GO:0006654,GO:0006725,GO:0006732,GO:0006733,GO:0006734,GO:…	1.1.1.8	ko:K00006	ko00564,ko01110,ko04011,map00564,map01110,map04011	.	R00842	RC00029	ko00000,ko00001,ko01000	.	.	.	NAD_Gly3P_dh_C,NAD_Gly3P_dh_N	.	.	gi|1210013332|ref|XM_021545230.1|;96.738;2422;57;8;12;2414;1;2419;0;4015;PREDICTED: Lonchura striata domestica glycerol-3-phosphate dehydrogenase 1 (GPD1), transcript variant X1, mRNA
NonamEVm007526t1	NonamEVm007526	FKBP6_HORSE^FKBP6_HORSE^Q:70-978,H:4-306^62%ID^E:4.08e-123^RecName: Full=Inactive peptidyl-prolyl cis-trans isomerase FKBP6;^Eukaryota; Metazoa; Chordata; Craniata; Vertebrata; Euteleostomi; Mammalia; Eutheria; Laurasiatheria; Perissodactyla; Equidae; Equus	.	NonamEVm007526t1.p1	7-996[+]	FKBP6_HORSE^FKBP6_HORSE^Q:22-324,H:4-306^62%ID^E:4.55e-125^RecName: Full=Inactive peptidyl-prolyl cis-trans isomerase FKBP6;^Eukaryota; Metazoa; Chordata; Craniata; Vertebrata; Euteleostomi; Mammalia; Eutheria; Laurasiatheria; Perissodactyla; Equidae; Equus	XP_021396070.1^XP_021396070.1^Q:7-993,H:1-334^89.2%ID^E:6.32e-209^.^.	XP_021396070.1^XP_021396070.1^Q:1-329,H:1-334^89.2%ID^E:2.94e-211^.^.	PF00254.33^FKBP_C^NULL^60-147^E:2e-17`PF13181.11^TPR_8^NULL^229-257^E:0.0024	.	.	.	KEGG:ecb:100061393	GO:0005737^cellular_component^cytoplasm`GO:0005829^cellular_component^cytosol`GO:0000795^cellular_component^synaptonemal complex`GO:0051879^molecular_function^Hsp90 protein binding`GO:0030154^biological_process^cell differentiation`GO:0051321^biological_process^meiotic cell cycle`GO:0034587^biological_process^piRNA processing`GO:0006457^biological_process^protein folding`GO:0031047^biological_pro…	GO:0005737^cellular_component^cytoplasm`GO:0005829^cellular_component^cytosol`GO:0000795^cellular_component^synaptonemal complex`GO:0051879^molecular_function^Hsp90 protein binding`GO:0030154^biological_process^cell differentiation`GO:0051321^biological_process^meiotic cell cycle`GO:0034587^biological_process^piRNA processing`GO:0006457^biological_process^protein folding`GO:0031047^biological_pro…	GO:0003755^molecular_function^peptidyl-prolyl cis-trans isomerase activity`GO:0005515^molecular_function^protein binding	59894.ENSFALP00000014290	1.76e-196	549.0	COG0545@1|root,KOG0543@2759|Eukaryota,39S9Z@33154|Opisthokonta,3BDE1@33208|Metazoa,3CXW8@33213|Bilateria,487D2@7711|Chordata,493V3@7742|Vertebrata,4GM91@8782|Aves	33208|Metazoa	O	Peptidyl-prolyl cis-trans isomerase FKBP6	FKBP6	GO:0000003,GO:0000228,GO:0000413,GO:0000793,GO:0000794,GO:0000795,GO:0003006,GO:0003674,GO:0003755,GO:0003824,GO:0005488,GO:0005515,GO:0005527,GO:0005528,GO:0005575,GO:0005622,GO:0005623,GO:0005634,GO:0005654,GO:0005694,GO:0005737,GO:0005829,GO:0006139,GO:0006259,GO:0006304,GO:0006305,GO:0006306,GO:0006457,GO:0006464,GO:0006725,GO:0006807,GO:0007049,GO:0007276,GO:0007281,GO:0007283,GO:0007292,GO:…	5.2.1.8	ko:K09572	.	.	.	.	ko00000,ko01000,ko03110	.	.	.	FKBP_C,TPR_2	.	.	gi|1912352704|ref|XM_036395386.1|;93.164;1375;92;2;55;1428;118;1491;0;2017;PREDICTED: Molothrus ater FKBP prolyl isomerase family member 6 (inactive) (FKBP6), mRNA
NonamEVm007526t2	NonamEVm007526	FKBP6_HORSE^FKBP6_HORSE^Q:91-804,H:4-306^48.5%ID^E:1.55e-83^RecName: Full=Inactive peptidyl-prolyl cis-trans isomerase FKBP6;^Eukaryota; Metazoa; Chordata; Craniata; Vertebrata; Euteleostomi; Mammalia; Eutheria; Laurasiatheria; Perissodactyla; Equidae; Equus	.	NonamEVm007526t2.p1	28-822[+]	FKBP6_HORSE^FKBP6_HORSE^Q:22-259,H:4-306^48.5%ID^E:1.71e-85^RecName: Full=Inactive peptidyl-prolyl cis-trans isomerase FKBP6;^Eukaryota; Metazoa; Chordata; Craniata; Vertebrata; Euteleostomi; Mammalia; Eutheria; Laurasiatheria; Perissodactyla; Equidae; Equus	XP_032934025.1^XP_032934025.1^Q:34-819,H:5-282^81.7%ID^E:1.86e-152^.^.	XP_032934025.1^XP_032934025.1^Q:3-264,H:5-282^81.7%ID^E:3.62e-155^.^.	PF00254.33^FKBP_C^NULL^60-147^E:1.3e-17	.	.	.	KEGG:ecb:100061393	GO:0005737^cellular_component^cytoplasm`GO:0005829^cellular_component^cytosol`GO:0000795^cellular_component^synaptonemal complex`GO:0051879^molecular_function^Hsp90 protein binding`GO:0030154^biological_process^cell differentiation`GO:0051321^biological_process^meiotic cell cycle`GO:0034587^biological_process^piRNA processing`GO:0006457^biological_process^protein folding`GO:0031047^biological_pro…	GO:0005737^cellular_component^cytoplasm`GO:0005829^cellular_component^cytosol`GO:0000795^cellular_component^synaptonemal complex`GO:0051879^molecular_function^Hsp90 protein binding`GO:0030154^biological_process^cell differentiation`GO:0051321^biological_process^meiotic cell cycle`GO:0034587^biological_process^piRNA processing`GO:0006457^biological_process^protein folding`GO:0031047^biological_pro…	GO:0003755^molecular_function^peptidyl-prolyl cis-trans isomerase activity	181119.XP_005526055.1	5.36e-136	395.0	COG0545@1|root,KOG0543@2759|Eukaryota,39S9Z@33154|Opisthokonta,3BDE1@33208|Metazoa,3CXW8@33213|Bilateria,487D2@7711|Chordata,493V3@7742|Vertebrata,4GM91@8782|Aves	33208|Metazoa	O	Peptidyl-prolyl cis-trans isomerase FKBP6	FKBP6	GO:0000003,GO:0000228,GO:0000413,GO:0000793,GO:0000794,GO:0000795,GO:0003006,GO:0003674,GO:0003755,GO:0003824,GO:0005488,GO:0005515,GO:0005527,GO:0005528,GO:0005575,GO:0005622,GO:0005623,GO:0005634,GO:0005654,GO:0005694,GO:0005737,GO:0005829,GO:0006139,GO:0006259,GO:0006304,GO:0006305,GO:0006306,GO:0006457,GO:0006464,GO:0006725,GO:0006807,GO:0007049,GO:0007276,GO:0007281,GO:0007283,GO:0007292,GO:…	5.2.1.8	ko:K09572	.	.	.	.	ko00000,ko01000,ko03110	.	.	.	FKBP_C,TPR_2	.	.	gi|2073992444|ref|XM_033078134.2|;89.553;1187;117;5;76;1256;128;1313;0;1498;PREDICTED: Catharus ustulatus FKBP prolyl isomerase family member 6 (inactive) (FKBP6), transcript variant X5, mRNA
NonamEVm007979t1	NonamEVm007979	SPT4A_MOUSE^SPT4A_MOUSE^Q:593-943,H:1-117^94%ID^E:6.18e-75^RecName: Full=Transcription elongation factor SPT4-A;^Eukaryota; Metazoa; Chordata; Craniata; Vertebrata; Euteleostomi; Mammalia; Eutheria; Euarchontoglires; Glires; Rodentia; Myomorpha; Muroidea; Muridae; Murinae; Mus; Mus	.	NonamEVm007979t1.p1	2-946[+]	SPT4A_MOUSE^SPT4A_MOUSE^Q:198-314,H:1-117^94%ID^E:4.61e-76^RecName: Full=Transcription elongation factor SPT4-A;^Eukaryota; Metazoa; Chordata; Craniata; Vertebrata; Euteleostomi; Mammalia; Eutheria; Euarchontoglires; Glires; Rodentia; Myomorpha; Muroidea; Muridae; Murinae; Mus; Mus	NP_001232550.1^NP_001232550.1^Q:584-943,H:1-120^100%ID^E:2.52e-77^.^.	NP_001232550.1^NP_001232550.1^Q:195-314,H:1-120^100%ID^E:1.74e-78^.^.	PF06093.18^Spt4^NULL^210-287^E:6.6e-33	.	.	.	KEGG:mmu:20922	GO:0032044^cellular_component^DSIF complex`GO:0046982^molecular_function^protein heterodimerization activity`GO:0000993^molecular_function^RNA polymerase II complex binding`GO:0008270^molecular_function^zinc ion binding`GO:0000122^biological_process^negative regulation of transcription by RNA polymerase II`GO:0034244^biological_process^negative regulation of transcription elongation by RNA polyme…	GO:0032044^cellular_component^DSIF complex`GO:0046982^molecular_function^protein heterodimerization activity`GO:0000993^molecular_function^RNA polymerase II complex binding`GO:0008270^molecular_function^zinc ion binding`GO:0000122^biological_process^negative regulation of transcription by RNA polymerase II`GO:0034244^biological_process^negative regulation of transcription elongation by RNA polyme…	.	181119.XP_005525952.1	4.14e-79	243.0	COG5204@1|root,KOG3490@2759|Eukaryota,3A66E@33154|Opisthokonta,3BSSH@33208|Metazoa,3D7AJ@33213|Bilateria,48F1M@7711|Chordata,49B3T@7742|Vertebrata,4GV0M@8782|Aves	33208|Metazoa	K	Transcription elongation factor	SUPT4H1	GO:0000122,GO:0000993,GO:0001098,GO:0001099,GO:0003674,GO:0003676,GO:0003700,GO:0003723,GO:0003727,GO:0005488,GO:0005515,GO:0005575,GO:0005622,GO:0005623,GO:0005634,GO:0005654,GO:0005694,GO:0005700,GO:0005703,GO:0005705,GO:0006139,GO:0006325,GO:0006338,GO:0006351,GO:0006354,GO:0006355,GO:0006357,GO:0006366,GO:0006368,GO:0006396,GO:0006397,GO:0006725,GO:0006807,GO:0006996,GO:0008023,GO:0008150,GO:…	.	ko:K15171	.	.	.	.	ko00000,ko03019,ko03021	.	.	.	Spt4	.	.	gi|350538002|ref|NM_001245621.1|;99.858;703;1;0;556;1258;2;704;0;1293;Taeniopygia guttata SPT4 homolog, DSIF elongation factor subunit (SUPT4H1), mRNA
NonamEVm007979t2	NonamEVm007979	SPT4A_MOUSE^SPT4A_MOUSE^Q:202-552,H:1-117^94%ID^E:9.82e-77^RecName: Full=Transcription elongation factor SPT4-A;^Eukaryota; Metazoa; Chordata; Craniata; Vertebrata; Euteleostomi; Mammalia; Eutheria; Euarchontoglires; Glires; Rodentia; Myomorpha; Muroidea; Muridae; Murinae; Mus; Mus	.	NonamEVm007979t2.p1	1-555[+]	SPT4A_MOUSE^SPT4A_MOUSE^Q:68-184,H:1-117^94%ID^E:4.27e-78^RecName: Full=Transcription elongation factor SPT4-A;^Eukaryota; Metazoa; Chordata; Craniata; Vertebrata; Euteleostomi; Mammalia; Eutheria; Euarchontoglires; Glires; Rodentia; Myomorpha; Muroidea; Muridae; Murinae; Mus; Mus	NP_001232550.1^NP_001232550.1^Q:193-552,H:1-120^100%ID^E:3.65e-79^.^.	NP_001232550.1^NP_001232550.1^Q:65-184,H:1-120^100%ID^E:1.51e-80^.^.	PF06093.18^Spt4^NULL^80-157^E:2.2e-33	.	.	.	KEGG:mmu:20922	GO:0032044^cellular_component^DSIF complex`GO:0046982^molecular_function^protein heterodimerization activity`GO:0000993^molecular_function^RNA polymerase II complex binding`GO:0008270^molecular_function^zinc ion binding`GO:0000122^biological_process^negative regulation of transcription by RNA polymerase II`GO:0034244^biological_process^negative regulation of transcription elongation by RNA polyme…	GO:0032044^cellular_component^DSIF complex`GO:0046982^molecular_function^protein heterodimerization activity`GO:0000993^molecular_function^RNA polymerase II complex binding`GO:0008270^molecular_function^zinc ion binding`GO:0000122^biological_process^negative regulation of transcription by RNA polymerase II`GO:0034244^biological_process^negative regulation of transcription elongation by RNA polyme…	.	181119.XP_005525952.1	3.63e-81	243.0	COG5204@1|root,KOG3490@2759|Eukaryota,3A66E@33154|Opisthokonta,3BSSH@33208|Metazoa,3D7AJ@33213|Bilateria,48F1M@7711|Chordata,49B3T@7742|Vertebrata,4GV0M@8782|Aves	33208|Metazoa	K	Transcription elongation factor	SUPT4H1	GO:0000122,GO:0000993,GO:0001098,GO:0001099,GO:0003674,GO:0003676,GO:0003700,GO:0003723,GO:0003727,GO:0005488,GO:0005515,GO:0005575,GO:0005622,GO:0005623,GO:0005634,GO:0005654,GO:0005694,GO:0005700,GO:0005703,GO:0005705,GO:0006139,GO:0006325,GO:0006338,GO:0006351,GO:0006354,GO:0006355,GO:0006357,GO:0006366,GO:0006368,GO:0006396,GO:0006397,GO:0006725,GO:0006807,GO:0006996,GO:0008023,GO:0008150,GO:…	.	ko:K15171	.	.	.	.	ko00000,ko03019,ko03021	.	.	.	Spt4	.	.	gi|350538002|ref|NM_001245621.1|;99.858;703;1;0;165;867;2;704;0;1293;Taeniopygia guttata SPT4 homolog, DSIF elongation factor subunit (SUPT4H1), mRNA
NonamEVm007979t3	NonamEVm007979	.	.	NonamEVm007979t3.p1	3-719[+]	.	.	.	.	.	.	.	.	.	.	.	.	.	.	.	.	.	.	.	.	.	.	.	.	.	.	.	.	.	.	.	.	.	gi|2582879788|emb|OY740744.1|;84.953;319;38;9;525;835;10956416;10956100;1.76e-80;315;Fringilla coelebs genome assembly, chromosome: 20
NonamEVm007979t4	NonamEVm007979	SPT4A_MOUSE^SPT4A_MOUSE^Q:32-286,H:1-85^91.8%ID^E:8.18e-50^RecName: Full=Transcription elongation factor SPT4-A;^Eukaryota; Metazoa; Chordata; Craniata; Vertebrata; Euteleostomi; Mammalia; Eutheria; Euarchontoglires; Glires; Rodentia; Myomorpha; Muroidea; Muridae; Murinae; Mus; Mus	.	NonamEVm007979t4.p1	23-538[+]	SPT4A_MOUSE^SPT4A_MOUSE^Q:4-88,H:1-85^91.8%ID^E:3.57e-55^RecName: Full=Transcription elongation factor SPT4-A;^Eukaryota; Metazoa; Chordata; Craniata; Vertebrata; Euteleostomi; Mammalia; Eutheria; Euarchontoglires; Glires; Rodentia; Myomorpha; Muroidea; Muridae; Murinae; Mus; Mus	NP_001232550.1^NP_001232550.1^Q:23-286,H:1-88^100%ID^E:3.96e-52^.^.	NP_001232550.1^NP_001232550.1^Q:1-88,H:1-88^100%ID^E:6.37e-58^.^.	PF06093.18^Spt4^NULL^16-88^E:1.3e-30	.	.	.	KEGG:mmu:20922	GO:0032044^cellular_component^DSIF complex`GO:0046982^molecular_function^protein heterodimerization activity`GO:0000993^molecular_function^RNA polymerase II complex binding`GO:0008270^molecular_function^zinc ion binding`GO:0000122^biological_process^negative regulation of transcription by RNA polymerase II`GO:0034244^biological_process^negative regulation of transcription elongation by RNA polyme…	GO:0032044^cellular_component^DSIF complex`GO:0046982^molecular_function^protein heterodimerization activity`GO:0000993^molecular_function^RNA polymerase II complex binding`GO:0008270^molecular_function^zinc ion binding`GO:0000122^biological_process^negative regulation of transcription by RNA polymerase II`GO:0034244^biological_process^negative regulation of transcription elongation by RNA polyme…	.	181119.XP_005525952.1	1.53e-58	185.0	COG5204@1|root,KOG3490@2759|Eukaryota,3A66E@33154|Opisthokonta,3BSSH@33208|Metazoa,3D7AJ@33213|Bilateria,48F1M@7711|Chordata,49B3T@7742|Vertebrata,4GV0M@8782|Aves	33208|Metazoa	K	Transcription elongation factor	SUPT4H1	GO:0000122,GO:0000993,GO:0001098,GO:0001099,GO:0003674,GO:0003676,GO:0003700,GO:0003723,GO:0003727,GO:0005488,GO:0005515,GO:0005575,GO:0005622,GO:0005623,GO:0005634,GO:0005654,GO:0005694,GO:0005700,GO:0005703,GO:0005705,GO:0006139,GO:0006325,GO:0006338,GO:0006351,GO:0006354,GO:0006355,GO:0006357,GO:0006366,GO:0006368,GO:0006396,GO:0006397,GO:0006725,GO:0006807,GO:0006996,GO:0008023,GO:0008150,GO:…	.	ko:K15171	.	.	.	.	ko00000,ko03019,ko03021	.	.	.	Spt4	.	.	gi|2582879788|emb|OY740744.1|;89.556;1283;98;14;1054;2308;10957890;10959164;0;1594;Fringilla coelebs genome assembly, chromosome: 20
NonamEVm008248t1	NonamEVm008248	PERE_HUMAN^PERE_HUMAN^Q:17-1804,H:114-712^44.9%ID^E:8.55e-148^RecName: Full=Eosinophil peroxidase;^Eukaryota; Metazoa; Chordata; Craniata; Vertebrata; Euteleostomi; Mammalia; Eutheria; Euarchontoglires; Primates; Haplorrhini; Catarrhini; Hominidae; Homo	.	NonamEVm008248t1.p1	950-1858[+]	PERE_HUMAN^PERE_HUMAN^Q:1-285,H:425-712^66.3%ID^E:3.55e-134^RecName: Full=Eosinophil peroxidase;^Eukaryota; Metazoa; Chordata; Craniata; Vertebrata; Euteleostomi; Mammalia; Eutheria; Euarchontoglires; Primates; Haplorrhini; Catarrhini; Hominidae; Homo	XP_036251010.1^XP_036251010.1^Q:17-1855,H:113-725^63.3%ID^E:1.17e-261^.^.	XP_021396075.1^XP_021396075.1^Q:1-302,H:533-834^97%ID^E:1.32e-212^.^.	PF03098.20^An_peroxidase^NULL^1-262^E:8.6e-88	.	.	.	KEGG:hsa:8288	GO:0070062^cellular_component^extracellular exosome`GO:0005576^cellular_component^extracellular region`GO:0005615^cellular_component^extracellular space`GO:0034774^cellular_component^secretory granule lumen`GO:0020037^molecular_function^heme binding`GO:0140825^molecular_function^lactoperoxidase activity`GO:0046872^molecular_function^metal ion binding`GO:0004601^molecular_function^peroxidase activ…	GO:0070062^cellular_component^extracellular exosome`GO:0005576^cellular_component^extracellular region`GO:0005615^cellular_component^extracellular space`GO:0034774^cellular_component^secretory granule lumen`GO:0020037^molecular_function^heme binding`GO:0140825^molecular_function^lactoperoxidase activity`GO:0046872^molecular_function^metal ion binding`GO:0004601^molecular_function^peroxidase activ…	.	59894.ENSFALP00000014342	2.47e-196	563.0	KOG2408@1|root,KOG2408@2759|Eukaryota,39TE7@33154|Opisthokonta,3BD2Z@33208|Metazoa,3CRDJ@33213|Bilateria,47Z4Y@7711|Chordata,48VVQ@7742|Vertebrata,4GQA5@8782|Aves	33208|Metazoa	S	Animal haem peroxidase	MPO	GO:0000302,GO:0000303,GO:0000305,GO:0000323,GO:0001775,GO:0001817,GO:0001818,GO:0001819,GO:0001878,GO:0002148,GO:0002149,GO:0002215,GO:0002252,GO:0002263,GO:0002274,GO:0002275,GO:0002283,GO:0002366,GO:0002376,GO:0002443,GO:0002444,GO:0002446,GO:0002679,GO:0003674,GO:0003682,GO:0003824,GO:0004601,GO:0005488,GO:0005539,GO:0005575,GO:0005576,GO:0005615,GO:0005622,GO:0005623,GO:0005634,GO:0005737,GO:…	1.11.1.7,1.11.2.2	ko:K10788,ko:K10789	ko00983,ko04145,ko05202,ko05221,ko05310,map00983,map04145,map05202,map05221,map05310	.	R11906	.	ko00000,ko00001,ko01000,ko04147	.	.	.	An_peroxidase,C1q	.	.	gi|2578448845|ref|XM_059486822.1|;92.029;2735;192;16;18;2742;379;3097;0;3819;PREDICTED: Ammospiza nelsoni eosinophil peroxidase-like (LOC132082517), mRNA
NonamEVm008795t1	NonamEVm008795	.	.	NonamEVm008795t1.p1	10-756[+]	.	XP_027560729.1^XP_027560729.1^Q:75-803,H:29-294^37.5%ID^E:1.27e-18^.^.	.	.	.	.	.	.	.	.	.	.	.	.	.	.	.	.	.	.	.	.	.	.	.	.	.	.	.	.	.	.	.	gi|1210004254|ref|XM_021540393.1|;93.644;944;26;8;1;920;2190;3123;0;1380;PREDICTED: Lonchura striata domestica septin 4 (SEPTIN4), transcript variant X2, mRNA
NonamEVm008795t2	NonamEVm008795	.	.	NonamEVm008795t2.p1	10-840[+]	.	XP_027560729.1^XP_027560729.1^Q:109-816,H:29-285^30.4%ID^E:1.61e-08^.^.	XP_027560729.1^XP_027560729.1^Q:34-241,H:29-249^32%ID^E:1.38e-08^.^.	.	.	.	.	.	.	.	.	.	.	.	.	.	.	.	.	.	.	.	.	.	.	.	.	.	.	.	.	.	.	gi|1210004254|ref|XM_021540393.1|;93.189;969;31;9;1;945;2156;3113;0;1391;PREDICTED: Lonchura striata domestica septin 4 (SEPTIN4), transcript variant X2, mRNA
NonamEVm008795t3	NonamEVm008795	.	.	NonamEVm008795t3.p1	10-756[+]	.	XP_027560729.1^XP_027560729.1^Q:75-803,H:29-294^37.5%ID^E:6.33e-18^.^.	.	.	.	.	.	.	.	.	.	.	.	.	.	.	.	.	.	.	.	.	.	.	.	.	.	.	.	.	.	.	.	gi|1210004254|ref|XM_021540393.1|;93.651;945;26;8;1;921;2190;3124;0;1382;PREDICTED: Lonchura striata domestica septin 4 (SEPTIN4), transcript variant X2, mRNA
NonamEVm008818t1	NonamEVm008818	.	.	NonamEVm008818t1.p1	3-830[+]	.	.	.	.	.	.	.	.	.	.	.	.	.	.	.	.	.	.	.	.	.	.	.	.	.	.	.	.	.	.	.	.	.	gi|1772556348|ref|XM_021549412.2|;80.266;527;80;22;202;722;974;1482;8.07e-99;375;PREDICTED: Lonchura striata domestica mitochondrial ribosomal protein L4 (MRPL4), mRNA
NonamEVm008818t2	NonamEVm008818	.	.	NonamEVm008818t2.p1	1-741[+]	.	.	.	.	.	.	.	.	.	.	.	.	.	.	.	.	.	.	.	.	.	.	.	.	.	.	.	.	.	.	.	.	.	gi|1772556348|ref|XM_021549412.2|;78.776;523;86;19;107;619;976;1483;2e-84;327;PREDICTED: Lonchura striata domestica mitochondrial ribosomal protein L4 (MRPL4), mRNA
NonamEVm008873t1	NonamEVm008873	.	.	NonamEVm008873t1.p1	10-741[+]	.	XP_032939283.1^XP_032939283.1^Q:445-200,H:1-82^60%ID^E:2e-13^.^.	.	.	.	.	.	.	.	.	.	.	.	.	.	.	.	.	.	.	.	.	.	.	.	.	.	.	.	.	.	.	.	gi|1210013340|ref|XM_021545234.1|;94.424;1381;48;10;1;1375;2507;3864;0;2097;PREDICTED: Lonchura striata domestica acid sensing ion channel subunit 1 (ASIC1), transcript variant X3, mRNA
NonamEVm008873t2	NonamEVm008873	.	.	NonamEVm008873t2.p1	10-591[+]	.	XP_032939284.1^XP_032939284.1^Q:512-222,H:225-322^57.4%ID^E:5.82e-15^.^.	XP_015155741.2^XP_015155741.2^Q:49-184,H:66-197^40.4%ID^E:1.42e-09^.^.	.	.	.	.	.	.	.	.	.	.	.	.	.	.	.	.	.	.	.	.	.	.	.	.	.	.	.	.	.	.	gi|1210013340|ref|XM_021545234.1|;94.928;1735;59;7;1;1707;2128;3861;0;2689;PREDICTED: Lonchura striata domestica acid sensing ion channel subunit 1 (ASIC1), transcript variant X3, mRNA
NonamEVm008873t3	NonamEVm008873	.	.	NonamEVm008873t3.p1	10-831[+]	.	XP_032939283.1^XP_032939283.1^Q:506-291,H:13-82^65.8%ID^E:4.87e-15^.^.	.	.	.	.	.	.	.	.	.	.	.	.	.	.	.	.	.	.	.	.	.	.	.	.	.	.	.	.	.	.	.	gi|1210013340|ref|XM_021545234.1|;94.261;1481;55;7;1;1476;2419;3874;0;2237;PREDICTED: Lonchura striata domestica acid sensing ion channel subunit 1 (ASIC1), transcript variant X3, mRNA
NonamEVm008959t1	NonamEVm008959	PLCA_HUMAN^PLCA_HUMAN^Q:19-816,H:3-266^51.5%ID^E:3.94e-90^RecName: Full=1-acyl-sn-glycerol-3-phosphate acyltransferase alpha;^Eukaryota; Metazoa; Chordata; Craniata; Vertebrata; Euteleostomi; Mammalia; Eutheria; Euarchontoglires; Primates; Haplorrhini; Catarrhini; Hominidae; Homo	.	NonamEVm008959t1.p1	34-843[+]	PLCA_BOVIN^PLCA_BOVIN^Q:20-261,H:25-266^53.7%ID^E:1.43e-91^RecName: Full=1-acyl-sn-glycerol-3-phosphate acyltransferase alpha;^Eukaryota; Metazoa; Chordata; Craniata; Vertebrata; Euteleostomi; Mammalia; Eutheria; Laurasiatheria; Artiodactyla; Ruminantia; Pecora; Bovidae; Bovinae; Bos	XP_038014073.1^XP_038014073.1^Q:1-840,H:18-297^96.8%ID^E:1.56e-190^.^.	XP_021396074.1^XP_021396074.1^Q:1-269,H:1-269^98.5%ID^E:3.34e-188^.^.	PF01553.26^Acyltransferase^NULL^79-206^E:2.3e-41	.	TMRs:PredHel=4^Topology=o4-23i35-52o62-81i124-142o	.	KEGG:bta:282137	GO:0005783^cellular_component^endoplasmic reticulum`GO:0005789^cellular_component^endoplasmic reticulum membrane`GO:0016020^cellular_component^membrane`GO:0003841^molecular_function^1-acylglycerol-3-phosphate O-acyltransferase activity`GO:0016024^biological_process^CDP-diacylglycerol biosynthetic process`GO:0006654^biological_process^phosphatidic acid biosynthetic process`GO:0006644^biological_pr…	GO:0005783^cellular_component^endoplasmic reticulum`GO:0005789^cellular_component^endoplasmic reticulum membrane`GO:0003841^molecular_function^1-acylglycerol-3-phosphate O-acyltransferase activity`GO:0016024^biological_process^CDP-diacylglycerol biosynthetic process`GO:0006654^biological_process^phosphatidic acid biosynthetic process	GO:0016746^molecular_function^acyltransferase activity	59894.ENSFALP00000014331	5.5e-175	490.0	COG0204@1|root,KOG2848@2759|Eukaryota,38GE5@33154|Opisthokonta,3BC07@33208|Metazoa,3CWDI@33213|Bilateria,48837@7711|Chordata,48WN3@7742|Vertebrata,4GK67@8782|Aves	33208|Metazoa	I	Belongs to the 1-acyl-sn-glycerol-3-phosphate acyltransferase family	agpat2	.	2.3.1.51	ko:K13509	ko00561,ko00564,ko01100,ko01110,ko04072,ko04975,map00561,map00564,map01100,map01110,map04072,map04975	M00089	R02241,R09381	RC00004,RC00037,RC00039	ko00000,ko00001,ko00002,ko01000,ko01004	.	.	.	Acyltransferase	.	.	gi|2451486518|ref|XM_053995497.1|;96.352;1398;48;1;1;1395;52;1449;0;2296;PREDICTED: Vidua macroura 1-acyl-sn-glycerol-3-phosphate acyltransferase alpha-like (LOC128817188), mRNA
NonamEVm009214t1	NonamEVm009214	.	.	NonamEVm009214t1.p1	390-1172[+]	.	.	.	.	.	TMRs:PredHel=2^Topology=i164-186o206-228i	.	.	.	.	.	.	.	.	.	.	.	.	.	.	.	.	.	.	.	.	.	.	.	.	.	.	.	gi|2621701159|emb|OY759681.1|;83.753;3730;368;121;1150;4771;65197573;65201172;0;3312;Cinclus cinclus genome assembly, chromosome: 4
NonamEVm009266t1	NonamEVm009266	CSK2B_BOVIN^CSK2B_BOVIN^Q:51-695,H:1-215^100%ID^E:1.9e-163^RecName: Full=Casein kinase II subunit beta;^Eukaryota; Metazoa; Chordata; Craniata; Vertebrata; Euteleostomi; Mammalia; Eutheria; Laurasiatheria; Artiodactyla; Ruminantia; Pecora; Bovidae; Bovinae; Bos	.	NonamEVm009266t1.p1	51-698[+]	CSK2B_BOVIN^CSK2B_BOVIN^Q:1-215,H:1-215^100%ID^E:4.91e-164^RecName: Full=Casein kinase II subunit beta;^Eukaryota; Metazoa; Chordata; Craniata; Vertebrata; Euteleostomi; Mammalia; Eutheria; Laurasiatheria; Artiodactyla; Ruminantia; Pecora; Bovidae; Bovinae; Bos	XP_049648690.1^XP_049648690.1^Q:15-695,H:9-235^97.4%ID^E:2.07e-164^.^.	NP_001030315.1^NP_001030315.1^Q:1-215,H:1-215^100%ID^E:4.81e-161^.^.	PF01214.23^CK_II_beta^NULL^8-191^E:8.5e-80	.	.	.	KEGG:bta:539235	GO:0005737^cellular_component^cytoplasm`GO:0005956^cellular_component^protein kinase CK2 complex`GO:0034456^cellular_component^UTP-C complex`GO:0046872^molecular_function^metal ion binding`GO:0019887^molecular_function^protein kinase regulator activity`GO:0046719^biological_process^regulation by virus of viral protein levels in host cell`GO:0042325^biological_process^regulation of phosphorylation…	GO:0005737^cellular_component^cytoplasm`GO:0005956^cellular_component^protein kinase CK2 complex`GO:0034456^cellular_component^UTP-C complex`GO:0046872^molecular_function^metal ion binding`GO:0019887^molecular_function^protein kinase regulator activity`GO:0046719^biological_process^regulation by virus of viral protein levels in host cell`GO:0042325^biological_process^regulation of phosphorylation…	GO:0019887^molecular_function^protein kinase regulator activity`GO:0005956^cellular_component^protein kinase CK2 complex	109478.XP_005859935.1	6.22e-160	453.0	COG5041@1|root,KOG3092@2759|Eukaryota,38PKB@33154|Opisthokonta,3BDXS@33208|Metazoa,3CU8V@33213|Bilateria,4883W@7711|Chordata,49379@7742|Vertebrata,3JDKK@40674|Mammalia,4KXY3@9397|Chiroptera	33208|Metazoa	DKT	Plays a complex role in regulating the basal catalytic activity of the alpha subunit	CSNK2B	GO:0000003,GO:0000785,GO:0001775,GO:0001889,GO:0001932,GO:0001934,GO:0002009,GO:0002252,GO:0002263,GO:0002274,GO:0002275,GO:0002283,GO:0002366,GO:0002376,GO:0002443,GO:0002444,GO:0002446,GO:0003002,GO:0003006,GO:0003158,GO:0003159,GO:0003674,GO:0003682,GO:0003824,GO:0004672,GO:0004674,GO:0005102,GO:0005488,GO:0005515,GO:0005575,GO:0005576,GO:0005622,GO:0005623,GO:0005634,GO:0005654,GO:0005694,GO:…	.	ko:K03115	ko03008,ko04064,ko04137,ko04139,ko04310,ko04520,ko04712,ko05162,ko05168,ko05169,map03008,map04064,map04137,map04139,map04310,map04520,map04712,map05162,map05168,map05169	.	.	.	ko00000,ko00001,ko03009	.	.	.	CK_II_beta	.	.	gi|1799935330|ref|XM_032094408.1|;95.17;704;34;0;2;705;54;757;0;1112;PREDICTED: Corvus moneduloides casein kinase 2 beta (CSNK2B), mRNA
NonamEVm009266t2	NonamEVm009266	CSK2B_BOVIN^CSK2B_BOVIN^Q:129-773,H:1-215^100%ID^E:3.77e-163^RecName: Full=Casein kinase II subunit beta;^Eukaryota; Metazoa; Chordata; Craniata; Vertebrata; Euteleostomi; Mammalia; Eutheria; Laurasiatheria; Artiodactyla; Ruminantia; Pecora; Bovidae; Bovinae; Bos	.	NonamEVm009266t2.p1	3-776[+]	CSK2B_BOVIN^CSK2B_BOVIN^Q:43-257,H:1-215^100%ID^E:1.34e-163^RecName: Full=Casein kinase II subunit beta;^Eukaryota; Metazoa; Chordata; Craniata; Vertebrata; Euteleostomi; Mammalia; Eutheria; Laurasiatheria; Artiodactyla; Ruminantia; Pecora; Bovidae; Bovinae; Bos	KYO39311.1^KYO39311.1^Q:60-773,H:16-249^95%ID^E:2.29e-162^.^.	KYO39311.1^KYO39311.1^Q:20-257,H:16-249^95%ID^E:8.12e-163^.^.	PF01214.23^CK_II_beta^NULL^50-233^E:1.6e-79	.	.	.	KEGG:bta:539235	GO:0005737^cellular_component^cytoplasm`GO:0005956^cellular_component^protein kinase CK2 complex`GO:0034456^cellular_component^UTP-C complex`GO:0046872^molecular_function^metal ion binding`GO:0019887^molecular_function^protein kinase regulator activity`GO:0046719^biological_process^regulation by virus of viral protein levels in host cell`GO:0042325^biological_process^regulation of phosphorylation…	GO:0005737^cellular_component^cytoplasm`GO:0005956^cellular_component^protein kinase CK2 complex`GO:0034456^cellular_component^UTP-C complex`GO:0046872^molecular_function^metal ion binding`GO:0019887^molecular_function^protein kinase regulator activity`GO:0046719^biological_process^regulation by virus of viral protein levels in host cell`GO:0042325^biological_process^regulation of phosphorylation…	GO:0019887^molecular_function^protein kinase regulator activity`GO:0005956^cellular_component^protein kinase CK2 complex	38654.XP_006036180.1	7.56e-163	458.0	COG5041@1|root,KOG3092@2759|Eukaryota,38PKB@33154|Opisthokonta,3BDXS@33208|Metazoa,3CU8V@33213|Bilateria,4883W@7711|Chordata,49379@7742|Vertebrata	33208|Metazoa	DKT	Plays a complex role in regulating the basal catalytic activity of the alpha subunit	CSNK2B	GO:0000003,GO:0000785,GO:0001775,GO:0001889,GO:0001932,GO:0001934,GO:0002009,GO:0002252,GO:0002263,GO:0002274,GO:0002275,GO:0002283,GO:0002366,GO:0002376,GO:0002443,GO:0002444,GO:0002446,GO:0003002,GO:0003006,GO:0003158,GO:0003159,GO:0003674,GO:0003682,GO:0003824,GO:0004672,GO:0004674,GO:0005102,GO:0005488,GO:0005515,GO:0005575,GO:0005576,GO:0005622,GO:0005623,GO:0005634,GO:0005654,GO:0005694,GO:…	.	ko:K03115	ko03008,ko04064,ko04137,ko04139,ko04310,ko04520,ko04712,ko05162,ko05168,ko05169,map03008,map04064,map04137,map04139,map04310,map04520,map04712,map05162,map05168,map05169	.	.	.	ko00000,ko00001,ko03009	.	.	.	CK_II_beta	.	.	gi|1799935330|ref|XM_032094408.1|;95.827;671;28;0;113;783;87;757;0;1085;PREDICTED: Corvus moneduloides casein kinase 2 beta (CSNK2B), mRNA
NonamEVm009266t3	NonamEVm009266	CSK2B_BOVIN^CSK2B_BOVIN^Q:64-708,H:1-215^100%ID^E:2.62e-163^RecName: Full=Casein kinase II subunit beta;^Eukaryota; Metazoa; Chordata; Craniata; Vertebrata; Euteleostomi; Mammalia; Eutheria; Laurasiatheria; Artiodactyla; Ruminantia; Pecora; Bovidae; Bovinae; Bos	.	NonamEVm009266t3.p1	64-711[+]	CSK2B_BOVIN^CSK2B_BOVIN^Q:1-215,H:1-215^100%ID^E:4.91e-164^RecName: Full=Casein kinase II subunit beta;^Eukaryota; Metazoa; Chordata; Craniata; Vertebrata; Euteleostomi; Mammalia; Eutheria; Laurasiatheria; Artiodactyla; Ruminantia; Pecora; Bovidae; Bovinae; Bos	XP_049648690.1^XP_049648690.1^Q:28-708,H:9-235^97.4%ID^E:4.06e-164^.^.	NP_001030315.1^NP_001030315.1^Q:1-215,H:1-215^100%ID^E:4.81e-161^.^.	PF01214.23^CK_II_beta^NULL^8-191^E:8.6e-80	.	.	.	KEGG:bta:539235	GO:0005737^cellular_component^cytoplasm`GO:0005956^cellular_component^protein kinase CK2 complex`GO:0034456^cellular_component^UTP-C complex`GO:0046872^molecular_function^metal ion binding`GO:0019887^molecular_function^protein kinase regulator activity`GO:0046719^biological_process^regulation by virus of viral protein levels in host cell`GO:0042325^biological_process^regulation of phosphorylation…	GO:0005737^cellular_component^cytoplasm`GO:0005956^cellular_component^protein kinase CK2 complex`GO:0034456^cellular_component^UTP-C complex`GO:0046872^molecular_function^metal ion binding`GO:0019887^molecular_function^protein kinase regulator activity`GO:0046719^biological_process^regulation by virus of viral protein levels in host cell`GO:0042325^biological_process^regulation of phosphorylation…	GO:0019887^molecular_function^protein kinase regulator activity`GO:0005956^cellular_component^protein kinase CK2 complex	109478.XP_005859935.1	6.22e-160	453.0	COG5041@1|root,KOG3092@2759|Eukaryota,38PKB@33154|Opisthokonta,3BDXS@33208|Metazoa,3CU8V@33213|Bilateria,4883W@7711|Chordata,49379@7742|Vertebrata,3JDKK@40674|Mammalia,4KXY3@9397|Chiroptera	33208|Metazoa	DKT	Plays a complex role in regulating the basal catalytic activity of the alpha subunit	CSNK2B	GO:0000003,GO:0000785,GO:0001775,GO:0001889,GO:0001932,GO:0001934,GO:0002009,GO:0002252,GO:0002263,GO:0002274,GO:0002275,GO:0002283,GO:0002366,GO:0002376,GO:0002443,GO:0002444,GO:0002446,GO:0003002,GO:0003006,GO:0003158,GO:0003159,GO:0003674,GO:0003682,GO:0003824,GO:0004672,GO:0004674,GO:0005102,GO:0005488,GO:0005515,GO:0005575,GO:0005576,GO:0005622,GO:0005623,GO:0005634,GO:0005654,GO:0005694,GO:…	.	ko:K03115	ko03008,ko04064,ko04137,ko04139,ko04310,ko04520,ko04712,ko05162,ko05168,ko05169,map03008,map04064,map04137,map04139,map04310,map04520,map04712,map05162,map05168,map05169	.	.	.	ko00000,ko00001,ko03009	.	.	.	CK_II_beta	.	.	gi|1799935330|ref|XM_032094408.1|;94.986;718;36;0;1;718;40;757;0;1127;PREDICTED: Corvus moneduloides casein kinase 2 beta (CSNK2B), mRNA
NonamEVm009466t1	NonamEVm009466	SBDS_CHICK^SBDS_CHICK^Q:40-789,H:1-250^95.2%ID^E:5.33e-154^RecName: Full=Ribosome maturation protein SBDS;^Eukaryota; Metazoa; Chordata; Craniata; Vertebrata; Euteleostomi; Archelosauria; Archosauria; Dinosauria; Saurischia; Theropoda; Coelurosauria; Aves; Neognathae; Galloanserae; Galliformes; Phasianidae; Phasianinae; Gallus	.	NonamEVm009466t1.p1	40-792[+]	SBDS_CHICK^SBDS_CHICK^Q:1-250,H:1-250^95.2%ID^E:2.17e-164^RecName: Full=Ribosome maturation protein SBDS;^Eukaryota; Metazoa; Chordata; Craniata; Vertebrata; Euteleostomi; Archelosauria; Archosauria; Dinosauria; Saurischia; Theropoda; Coelurosauria; Aves; Neognathae; Galloanserae; Galliformes; Phasianidae; Phasianinae; Gallus	XP_032933854.1^XP_032933854.1^Q:40-789,H:1-250^99.6%ID^E:1.01e-157^.^.	XP_032933854.1^XP_032933854.1^Q:1-250,H:1-250^99.6%ID^E:2.94e-168^.^.	PF01172.23^SBDS^NULL^14-101^E:1e-32`PF09377.15^SBDS_domain_II^NULL^109-170^E:6e-30`PF20268.3^SBDS_C^NULL^172-239^E:1e-26	.	.	.	KEGG:gga:417477	GO:0005829^cellular_component^cytosol`GO:0005730^cellular_component^nucleolus`GO:0005654^cellular_component^nucleoplasm`GO:0000922^cellular_component^spindle pole`GO:0008017^molecular_function^microtubule binding`GO:0043022^molecular_function^ribosome binding`GO:0019843^molecular_function^rRNA binding`GO:0048539^biological_process^bone marrow development`GO:0030282^biological_process^bone mineral…	GO:0005829^cellular_component^cytosol`GO:0005730^cellular_component^nucleolus`GO:0005654^cellular_component^nucleoplasm`GO:0000922^cellular_component^spindle pole`GO:0008017^molecular_function^microtubule binding`GO:0043022^molecular_function^ribosome binding`GO:0019843^molecular_function^rRNA binding`GO:0048539^biological_process^bone marrow development`GO:0030282^biological_process^bone mineral…	GO:0042254^biological_process^ribosome biogenesis	181119.XP_005525945.1	4.97e-169	473.0	COG1500@1|root,KOG2917@2759|Eukaryota,38DFK@33154|Opisthokonta,3BCDI@33208|Metazoa,3CSVQ@33213|Bilateria,481W1@7711|Chordata,48V91@7742|Vertebrata,4GRXG@8782|Aves	33208|Metazoa	J	Ribosome maturation protein SBDS	SBDS	GO:0000226,GO:0000278,GO:0000922,GO:0001501,GO:0001503,GO:0001701,GO:0001824,GO:0001832,GO:0001833,GO:0002376,GO:0002520,GO:0003674,GO:0003676,GO:0003723,GO:0005488,GO:0005515,GO:0005575,GO:0005622,GO:0005623,GO:0005634,GO:0005654,GO:0005730,GO:0005737,GO:0005819,GO:0005829,GO:0005856,GO:0006139,GO:0006364,GO:0006396,GO:0006725,GO:0006807,GO:0006928,GO:0006935,GO:0006996,GO:0007010,GO:0007017,GO:…	.	ko:K14574	ko03008,map03008	.	.	.	ko00000,ko00001,ko03009	.	.	.	SBDS,SBDS_C	.	.	gi|1993866070|ref|XM_039732862.1|;93.234;3074;142;23;3;3026;1;3058;0;4464;PREDICTED: Passer montanus SBDS ribosome maturation factor (SBDS), mRNA
NonamEVm010162t1	NonamEVm010162	.	.	NonamEVm010162t1.p1	10-687[+]	.	.	.	.	.	.	.	.	.	.	.	.	.	.	.	.	.	.	.	.	.	.	.	.	.	.	.	.	.	.	.	.	.	gi|1751555586|ref|XM_030961394.1|;90.433;1108;71;16;846;1941;4652;5736;0;1426;PREDICTED: Camarhynchus parvulus arrestin domain containing 1 (ARRDC1), mRNA
NonamEVm010162t2	NonamEVm010162	.	.	NonamEVm010162t2.p1	10-687[+]	.	.	.	.	.	.	.	.	.	.	.	.	.	.	.	.	.	.	.	.	.	.	.	.	.	.	.	.	.	.	.	.	.	gi|2586305680|ref|XM_059865001.1|;86.333;1939;135;48;756;2592;3912;5822;0;1993;PREDICTED: Haemorhous mexicanus arrestin domain containing 1 (ARRDC1), mRNA
NonamEVm010471t1	NonamEVm010471	.	.	NonamEVm010471t1.p1	1862-2509[+]	.	OWK52261.1^OWK52261.1^Q:3206-3352,H:32-79^55.1%ID^E:4.76e-07^.^.	.	.	.	.	.	.	.	.	.	.	.	.	.	.	.	.	.	.	.	.	.	.	.	.	.	.	.	.	.	.	.	gi|2621701169|emb|OY759691.1|;86.929;1094;79;42;1;1046;20866166;20867243;0;1170;Cinclus cinclus genome assembly, chromosome: 14
NonamEVm010628t1	NonamEVm010628	CPNS1_PIG^CPNS1_PIG^Q:75-689,H:62-266^83.9%ID^E:2.76e-127^RecName: Full=Calpain small subunit 1;^Eukaryota; Metazoa; Chordata; Craniata; Vertebrata; Euteleostomi; Mammalia; Eutheria; Laurasiatheria; Artiodactyla; Suina; Suidae; Sus	.	NonamEVm010628t1.p1	60-692[+]	CPNS1_PIG^CPNS1_PIG^Q:1-210,H:57-266^83.3%ID^E:1.03e-130^RecName: Full=Calpain small subunit 1;^Eukaryota; Metazoa; Chordata; Craniata; Vertebrata; Euteleostomi; Mammalia; Eutheria; Laurasiatheria; Artiodactyla; Suina; Suidae; Sus	XP_032939868.1^XP_032939868.1^Q:3-689,H:26-269^90.2%ID^E:7.06e-144^.^.	XP_042653228.1^XP_042653228.1^Q:1-210,H:1-210^94.3%ID^E:8.26e-146^.^.	PF13833.11^EF-hand_8^NULL^53-111^E:7.8e-06`PF13202.11^EF-hand_5^NULL^121-136^E:0.014	.	.	.	KEGG:ssc:397587	GO:0110158^cellular_component^calpain complex`GO:0005737^cellular_component^cytoplasm`GO:0005886^cellular_component^plasma membrane`GO:0005509^molecular_function^calcium ion binding`GO:0004198^molecular_function^calcium-dependent cysteine-type endopeptidase activity`GO:0006508^biological_process^proteolysis	GO:0110158^cellular_component^calpain complex`GO:0005737^cellular_component^cytoplasm`GO:0005886^cellular_component^plasma membrane`GO:0005509^molecular_function^calcium ion binding`GO:0004198^molecular_function^calcium-dependent cysteine-type endopeptidase activity`GO:0006508^biological_process^proteolysis	GO:0005509^molecular_function^calcium ion binding	9478.XP_008071858.1	5.56e-128	370.0	KOG0037@1|root,KOG0037@2759|Eukaryota,38F4U@33154|Opisthokonta,3BGT6@33208|Metazoa,3CTI8@33213|Bilateria,47YU7@7711|Chordata,48XMN@7742|Vertebrata,3JATZ@40674|Mammalia,35CIB@314146|Euarchontoglires,4MFVH@9443|Primates	33208|Metazoa	T	Calpain small subunit 1	CAPNS1	GO:0003674,GO:0003824,GO:0004175,GO:0004197,GO:0004198,GO:0005488,GO:0005509,GO:0005515,GO:0005575,GO:0005622,GO:0005623,GO:0005737,GO:0005829,GO:0005886,GO:0006508,GO:0006807,GO:0007275,GO:0008150,GO:0008152,GO:0008219,GO:0008233,GO:0008234,GO:0008284,GO:0008544,GO:0009888,GO:0009894,GO:0009913,GO:0009987,GO:0010506,GO:0012501,GO:0016020,GO:0016241,GO:0016787,GO:0019222,GO:0019538,GO:0030154,GO:…	.	ko:K08583	.	.	.	.	ko00000,ko01002	.	.	.	EF-hand_5,EF-hand_8	.	.	gi|2451396853|ref|XM_053933125.1|;94.848;854;30;5;3;853;397;1239;0;1321;PREDICTED: Vidua chalybeata calpain small subunit 1 (CAPNS1), mRNA
NonamEVm010756t1	NonamEVm010756	BCL7B_HUMAN^BCL7B_HUMAN^Q:49-654,H:1-202^91.6%ID^E:4.19e-110^RecName: Full=B-cell CLL/lymphoma 7 protein family member B;^Eukaryota; Metazoa; Chordata; Craniata; Vertebrata; Euteleostomi; Mammalia; Eutheria; Euarchontoglires; Primates; Haplorrhini; Catarrhini; Hominidae; Homo	.	NonamEVm010756t1.p1	49-657[+]	BCL7B_HUMAN^BCL7B_HUMAN^Q:1-202,H:1-202^91.6%ID^E:1.29e-114^RecName: Full=B-cell CLL/lymphoma 7 protein family member B;^Eukaryota; Metazoa; Chordata; Craniata; Vertebrata; Euteleostomi; Mammalia; Eutheria; Euarchontoglires; Primates; Haplorrhini; Catarrhini; Hominidae; Homo	XP_021396028.1^XP_021396028.1^Q:49-654,H:1-202^100%ID^E:2.95e-120^.^.	XP_021396028.1^XP_021396028.1^Q:1-202,H:1-202^100%ID^E:6.97e-125^.^.	PF04714.18^BCL_N^NULL^4-51^E:5.6e-29	.	.	.	KEGG:hsa:9275	GO:0000785^cellular_component^chromatin`GO:0140288^cellular_component^GBAF complex`GO:0016514^cellular_component^SWI/SNF complex`GO:0003779^molecular_function^actin binding`GO:0006915^biological_process^apoptotic process`GO:0030154^biological_process^cell differentiation`GO:0006338^biological_process^chromatin remodeling`GO:0045596^biological_process^negative regulation of cell differentiation`GO…	GO:0000785^cellular_component^chromatin`GO:0140288^cellular_component^GBAF complex`GO:0016514^cellular_component^SWI/SNF complex`GO:0003779^molecular_function^actin binding`GO:0006915^biological_process^apoptotic process`GO:0030154^biological_process^cell differentiation`GO:0006338^biological_process^chromatin remodeling`GO:0045596^biological_process^negative regulation of cell differentiation`GO…	.	181119.XP_005525959.1	1.18e-125	359.0	KOG4095@1|root,KOG4095@2759|Eukaryota,39TNM@33154|Opisthokonta,3BDTG@33208|Metazoa,3CVE4@33213|Bilateria,4885M@7711|Chordata,490KK@7742|Vertebrata,4GHS7@8782|Aves	33208|Metazoa	S	B-cell CLL lymphoma	BCL7B	GO:0003674,GO:0003779,GO:0005488,GO:0005515,GO:0008092	.	.	.	.	.	.	.	.	.	.	BCL_N	.	.	gi|1772564294|ref|XM_021540353.2|;96.835;1548;45;4;1;1544;4;1551;0;2584;PREDICTED: Lonchura striata domestica BAF chromatin remodeling complex subunit BCL7B (BCL7B), transcript variant X3, mRNA
NonamEVm010756t2	NonamEVm010756	BCL7B_HUMAN^BCL7B_HUMAN^Q:20-640,H:1-202^89.4%ID^E:6.78e-108^RecName: Full=B-cell CLL/lymphoma 7 protein family member B;^Eukaryota; Metazoa; Chordata; Craniata; Vertebrata; Euteleostomi; Mammalia; Eutheria; Euarchontoglires; Primates; Haplorrhini; Catarrhini; Hominidae; Homo	.	NonamEVm010756t2.p1	20-643[+]	BCL7B_HUMAN^BCL7B_HUMAN^Q:1-207,H:1-202^89.4%ID^E:2.14e-112^RecName: Full=B-cell CLL/lymphoma 7 protein family member B;^Eukaryota; Metazoa; Chordata; Craniata; Vertebrata; Euteleostomi; Mammalia; Eutheria; Euarchontoglires; Primates; Haplorrhini; Catarrhini; Hominidae; Homo	XP_021396027.1^XP_021396027.1^Q:20-640,H:1-207^100%ID^E:1.45e-123^.^.	XP_021396027.1^XP_021396027.1^Q:1-207,H:1-207^100%ID^E:3.18e-128^.^.	PF04714.18^BCL_N^NULL^4-51^E:5.9e-29	.	.	.	KEGG:hsa:9275	GO:0000785^cellular_component^chromatin`GO:0140288^cellular_component^GBAF complex`GO:0016514^cellular_component^SWI/SNF complex`GO:0003779^molecular_function^actin binding`GO:0006915^biological_process^apoptotic process`GO:0030154^biological_process^cell differentiation`GO:0006338^biological_process^chromatin remodeling`GO:0045596^biological_process^negative regulation of cell differentiation`GO…	GO:0000785^cellular_component^chromatin`GO:0140288^cellular_component^GBAF complex`GO:0016514^cellular_component^SWI/SNF complex`GO:0003779^molecular_function^actin binding`GO:0006915^biological_process^apoptotic process`GO:0030154^biological_process^cell differentiation`GO:0006338^biological_process^chromatin remodeling`GO:0045596^biological_process^negative regulation of cell differentiation`GO…	.	52644.XP_010584255.1	5.38e-129	368.0	KOG4095@1|root,KOG4095@2759|Eukaryota,39TNM@33154|Opisthokonta,3BDTG@33208|Metazoa,3CVE4@33213|Bilateria,4885M@7711|Chordata,490KK@7742|Vertebrata,4GHS7@8782|Aves	33208|Metazoa	S	B-cell CLL lymphoma	BCL7B	GO:0003674,GO:0003779,GO:0005488,GO:0005515,GO:0008092	.	.	.	.	.	.	.	.	.	.	BCL_N	.	.	gi|1772564293|ref|XM_021540352.2|;96.871;1534;44;4;2;1531;34;1567;0;2564;PREDICTED: Lonchura striata domestica BAF chromatin remodeling complex subunit BCL7B (BCL7B), transcript variant X2, mRNA
NonamEVm010756t4	NonamEVm010756	BCL7B_HUMAN^BCL7B_HUMAN^Q:43-567,H:28-202^89.7%ID^E:1.38e-90^RecName: Full=B-cell CLL/lymphoma 7 protein family member B;^Eukaryota; Metazoa; Chordata; Craniata; Vertebrata; Euteleostomi; Mammalia; Eutheria; Euarchontoglires; Primates; Haplorrhini; Catarrhini; Hominidae; Homo	.	NonamEVm010756t4.p1	1-570[+]	BCL7B_HUMAN^BCL7B_HUMAN^Q:15-189,H:28-202^89.7%ID^E:9.75e-95^RecName: Full=B-cell CLL/lymphoma 7 protein family member B;^Eukaryota; Metazoa; Chordata; Craniata; Vertebrata; Euteleostomi; Mammalia; Eutheria; Euarchontoglires; Primates; Haplorrhini; Catarrhini; Hominidae; Homo	XP_023795247.1^XP_023795247.1^Q:1-567,H:33-223^94.8%ID^E:6.2e-108^.^.	XP_023795247.1^XP_023795247.1^Q:1-189,H:33-223^94.8%ID^E:2.7e-112^.^.	PF04714.18^BCL_N^NULL^15-38^E:5.8e-10	.	.	.	KEGG:hsa:9275	GO:0000785^cellular_component^chromatin`GO:0140288^cellular_component^GBAF complex`GO:0016514^cellular_component^SWI/SNF complex`GO:0003779^molecular_function^actin binding`GO:0006915^biological_process^apoptotic process`GO:0030154^biological_process^cell differentiation`GO:0006338^biological_process^chromatin remodeling`GO:0045596^biological_process^negative regulation of cell differentiation`GO…	GO:0000785^cellular_component^chromatin`GO:0140288^cellular_component^GBAF complex`GO:0016514^cellular_component^SWI/SNF complex`GO:0003779^molecular_function^actin binding`GO:0006915^biological_process^apoptotic process`GO:0030154^biological_process^cell differentiation`GO:0006338^biological_process^chromatin remodeling`GO:0045596^biological_process^negative regulation of cell differentiation`GO…	.	181119.XP_005525959.1	2.61e-105	307.0	KOG4095@1|root,KOG4095@2759|Eukaryota,39TNM@33154|Opisthokonta,3BDTG@33208|Metazoa,3CVE4@33213|Bilateria,4885M@7711|Chordata,490KK@7742|Vertebrata,4GHS7@8782|Aves	33208|Metazoa	S	B-cell CLL lymphoma	BCL7B	GO:0003674,GO:0003779,GO:0005488,GO:0005515,GO:0008092	.	.	.	.	.	.	.	.	.	.	BCL_N	.	.	gi|1772564294|ref|XM_021540353.2|;96.527;1411;42;7;53;1459;143;1550;0;2327;PREDICTED: Lonchura striata domestica BAF chromatin remodeling complex subunit BCL7B (BCL7B), transcript variant X3, mRNA
NonamEVm010843t1	NonamEVm010843	.	.	NonamEVm010843t1.p1	10-624[+]	.	.	.	.	.	.	.	.	.	.	.	.	.	.	.	.	.	.	.	.	.	.	.	.	.	.	.	.	.	.	.	.	.	gi|1772555155|ref|XR_004149406.1|;88.208;212;24;1;369;579;1;212;1.05e-61;252;PREDICTED: Lonchura striata domestica uncharacterized LOC116184661 (LOC116184661), ncRNA
NonamEVm011035t1	NonamEVm011035	CY1_BOVIN^CY1_BOVIN^Q:2-640,H:113-325^85%ID^E:1.8e-138^RecName: Full=Cytochrome c1, heme protein, mitochondrial;^Eukaryota; Metazoa; Chordata; Craniata; Vertebrata; Euteleostomi; Mammalia; Eutheria; Laurasiatheria; Artiodactyla; Ruminantia; Pecora; Bovidae; Bovinae; Bos	.	NonamEVm011035t1.p1	44-643[+]	CY1_BOVIN^CY1_BOVIN^Q:1-199,H:127-325^84.9%ID^E:2.81e-127^RecName: Full=Cytochrome c1, heme protein, mitochondrial;^Eukaryota; Metazoa; Chordata; Craniata; Vertebrata; Euteleostomi; Mammalia; Eutheria; Laurasiatheria; Artiodactyla; Ruminantia; Pecora; Bovidae; Bovinae; Bos	NWU87962.1^NWU87962.1^Q:2-640,H:5-217^91.5%ID^E:8.32e-148^.^.	NWU87962.1^NWU87962.1^Q:1-199,H:19-217^91%ID^E:1.11e-135^.^.	PF02167.20^Cytochrom_C1^NULL^1-186^E:7.1e-81	.	.	.	KEGG:bta:512500	GO:0005743^cellular_component^mitochondrial inner membrane`GO:0005750^cellular_component^mitochondrial respiratory chain complex III`GO:0005739^cellular_component^mitochondrion`GO:0020037^molecular_function^heme binding`GO:0046872^molecular_function^metal ion binding`GO:0008121^molecular_function^ubiquinol-cytochrome-c reductase activity`GO:0006122^biological_process^mitochondrial electron transp…	GO:0005743^cellular_component^mitochondrial inner membrane`GO:0005750^cellular_component^mitochondrial respiratory chain complex III`GO:0005739^cellular_component^mitochondrion`GO:0020037^molecular_function^heme binding`GO:0046872^molecular_function^metal ion binding`GO:0008121^molecular_function^ubiquinol-cytochrome-c reductase activity`GO:0006122^biological_process^mitochondrial electron transp…	GO:0009055^molecular_function^electron transfer activity`GO:0020037^molecular_function^heme binding	52644.XP_010565123.1	7.16e-130	375.0	COG2857@1|root,KOG3052@2759|Eukaryota,38BPE@33154|Opisthokonta,3BEX1@33208|Metazoa,3CTP7@33213|Bilateria,480MT@7711|Chordata,48ZC6@7742|Vertebrata,4GVVI@8782|Aves	33208|Metazoa	C	Cytochrome c1, heme protein	CYC1	GO:0003674,GO:0003824,GO:0005575,GO:0005622,GO:0005623,GO:0005737,GO:0005739,GO:0005740,GO:0005743,GO:0005746,GO:0005750,GO:0006091,GO:0006119,GO:0006122,GO:0006139,GO:0006163,GO:0006164,GO:0006725,GO:0006753,GO:0006754,GO:0006793,GO:0006796,GO:0006807,GO:0006810,GO:0006811,GO:0006812,GO:0006839,GO:0007275,GO:0007568,GO:0008150,GO:0008152,GO:0008340,GO:0009055,GO:0009058,GO:0009117,GO:0009123,GO:…	.	ko:K00413	ko00190,ko01100,ko02020,ko04260,ko04714,ko04932,ko05010,ko05012,ko05016,map00190,map01100,map02020,map04260,map04714,map04932,map05010,map05012,map05016	M00151,M00152	.	.	ko00000,ko00001,ko00002	.	.	.	Cytochrom_C1	.	.	gi|2451411657|ref|XM_053969294.1|;92.574;808;36;14;1;793;381;1179;0;1138;PREDICTED: Vidua macroura cytochrome c1, heme protein, mitochondrial (LOC128802732), partial mRNA
NonamEVm011127t1	NonamEVm011127	K0040_HUMAN^K0040_HUMAN^Q:161-280,H:2-41^57.5%ID^E:5.9e-08^RecName: Full=Uncharacterized protein KIAA0040;^Eukaryota; Metazoa; Chordata; Craniata; Vertebrata; Euteleostomi; Mammalia; Eutheria; Euarchontoglires; Primates; Haplorrhini; Catarrhini; Hominidae; Homo	.	NonamEVm011127t1.p1	2-595[+]	K0040_HUMAN^K0040_HUMAN^Q:54-93,H:2-41^57.5%ID^E:4.25e-09^RecName: Full=Uncharacterized protein KIAA0040;^Eukaryota; Metazoa; Chordata; Craniata; Vertebrata; Euteleostomi; Mammalia; Eutheria; Euarchontoglires; Primates; Haplorrhini; Catarrhini; Hominidae; Homo	XP_036243253.1^XP_036243253.1^Q:5-388,H:71-216^80.1%ID^E:2.86e-63^.^.	XP_036243253.1^XP_036243253.1^Q:2-129,H:71-216^80.1%ID^E:2.48e-71^.^.	.	.	TMRs:PredHel=1^Topology=o75-97i	.	KEGG:hsa:9674	GO:0016020^cellular_component^membrane	GO:0016020^cellular_component^membrane	.	128390.XP_009461839.1	8.86e-43	146.0	2E402@1|root,2SAYZ@2759|Eukaryota,3A6HR@33154|Opisthokonta,3BSZT@33208|Metazoa,3D8RF@33213|Bilateria,48GEB@7711|Chordata,49CMX@7742|Vertebrata,4GV3K@8782|Aves	33208|Metazoa	S	kiaa0040	KIAA0040	.	.	.	.	.	.	.	.	.	.	.	.	.	.	gi|1210014562|ref|XM_021545888.1|;95.572;3455;108;15;1;3443;56;3477;0;5491;PREDICTED: Lonchura striata domestica KIAA0040 ortholog (KIAA0040), mRNA
NonamEVm011206t1	NonamEVm011206	.	.	NonamEVm011206t1.p1	3-590[+]	.	.	.	.	.	.	.	.	.	.	.	.	.	.	.	.	.	.	.	.	.	.	.	.	.	.	.	.	.	.	.	.	.	gi|2582879788|emb|OY740744.1|;89.206;3474;268;51;1;3407;10976867;10980300;0;4239;Fringilla coelebs genome assembly, chromosome: 20
NonamEVm011220t1	NonamEVm011220	STIP1_BOVIN^STIP1_BOVIN^Q:1-582,H:350-543^62.4%ID^E:1.02e-67^RecName: Full=Stress-induced-phosphoprotein 1;^Eukaryota; Metazoa; Chordata; Craniata; Vertebrata; Euteleostomi; Mammalia; Eutheria; Laurasiatheria; Artiodactyla; Ruminantia; Pecora; Bovidae; Bovinae; Bos	.	NonamEVm011220t1.p1	1-585[+]	STIP1_BOVIN^STIP1_BOVIN^Q:1-194,H:350-543^62.4%ID^E:2.26e-68^RecName: Full=Stress-induced-phosphoprotein 1;^Eukaryota; Metazoa; Chordata; Craniata; Vertebrata; Euteleostomi; Mammalia; Eutheria; Laurasiatheria; Artiodactyla; Ruminantia; Pecora; Bovidae; Bovinae; Bos	NXB99049.1^NXB99049.1^Q:1-582,H:127-320^72.7%ID^E:3.38e-80^.^.	NXB99049.1^NXB99049.1^Q:1-194,H:127-320^72.7%ID^E:7.21e-81^.^.	PF00515.33^TPR_1^NULL^15-43^E:1.1e-08`PF13414.11^TPR_11^NULL^18-57^E:1.2e-09`PF13432.11^TPR_16^NULL^19-66^E:0.00016`PF08238.17^Sel1^NULL^25-41^E:3.5`PF08238.17^Sel1^NULL^34-53^E:5.9`PF00515.33^TPR_1^NULL^45-78^E:1.7e-08`PF00515.33^TPR_1^NULL^80-112^E:5.2e-09`PF13181.11^TPR_8^NULL^80-111^E:1.4e-06`PF07719.22^TPR_2^NULL^81-111^E:5.1e-07`PF13428.11^TPR_14^NULL^82-116^E:2.7e-06`PF13174.11^TPR_6^NULL^…	.	.	.	KEGG:bta:617109	GO:0120293^cellular_component^dynein axonemal particle`GO:0005634^cellular_component^nucleus`GO:0051879^molecular_function^Hsp90 protein binding	GO:0120293^cellular_component^dynein axonemal particle`GO:0005634^cellular_component^nucleus`GO:0051879^molecular_function^Hsp90 protein binding	GO:0005515^molecular_function^protein binding	181119.XP_005533270.1	7.05e-80	254.0	COG0457@1|root,KOG0548@2759|Eukaryota,38GCK@33154|Opisthokonta,3BECN@33208|Metazoa,3CUW9@33213|Bilateria,4806S@7711|Chordata,491B0@7742|Vertebrata,4GJFN@8782|Aves	33208|Metazoa	O	Tetratricopeptide repeat	STIP1	GO:0000003,GO:0003674,GO:0004857,GO:0005488,GO:0005515,GO:0005575,GO:0005622,GO:0005623,GO:0005634,GO:0005737,GO:0005794,GO:0005829,GO:0006950,GO:0007275,GO:0007568,GO:0008022,GO:0008150,GO:0008340,GO:0009266,GO:0009408,GO:0009628,GO:0010259,GO:0012505,GO:0030234,GO:0030544,GO:0031072,GO:0032501,GO:0032502,GO:0032780,GO:0032991,GO:0042030,GO:0043086,GO:0043209,GO:0043226,GO:0043227,GO:0043229,GO:…	.	ko:K04734,ko:K09553,ko:K16362	ko04024,ko04062,ko04064,ko04210,ko04380,ko04620,ko04621,ko04622,ko04623,ko04624,ko04657,ko04658,ko04659,ko04660,ko04662,ko04668,ko04722,ko04920,ko04926,ko04931,ko05020,ko05120,ko05131,ko05134,ko05140,ko05142,ko05145,ko05160,ko05161,ko05162,ko05164,ko05166,ko05167,ko05168,ko05169,ko05200,ko05203,ko05215,ko05220,ko05222,map04024,map04062,map04064,map04210,map04380,map04620,map04621,map04622,map0462…	M00686	.	.	ko00000,ko00001,ko00002,ko03000,ko03110,ko04131,ko04516	.	.	.	TPR_1,TPR_11,TPR_12,TPR_16,TPR_2,TPR_8	.	.	gi|2451495635|ref|XM_053968215.1|;95.541;740;22;8;1;733;1123;1858;0;1173;PREDICTED: Vidua chalybeata stress induced phosphoprotein 1 (STIP1), mRNA
NonamEVm011312t1	NonamEVm011312	.	.	NonamEVm011312t1.p1	1142-1720[+]	.	XP_021409591.1^XP_021409591.1^Q:1142-1714,H:1-198^75.3%ID^E:9.63e-85^.^.	XP_021409591.1^XP_021409591.1^Q:1-191,H:1-198^75.3%ID^E:9.6e-92^.^.	.	.	.	.	.	.	.	.	8469.XP_007053226.1	0.000158	48.9	2DRIU@1|root,2S6E8@2759|Eukaryota,3A6QP@33154|Opisthokonta,3BTJ7@33208|Metazoa,3D9Q1@33213|Bilateria,48G5Q@7711|Chordata,49D3S@7742|Vertebrata	33208|Metazoa	S	Cytolysin Src-1-like	.	.	.	.	.	.	.	.	.	.	.	.	Anemone_cytotox	.	.	gi|1772556042|ref|XM_021553917.2|;83.934;666;81;15;1072;1714;31;693;5.01e-170;614;PREDICTED: Lonchura striata domestica uncharacterized LOC110483776 (LOC110483776), transcript variant X2, mRNA
NonamEVm011783t1	NonamEVm011783	.	.	NonamEVm011783t1.p1	10-555[+]	.	.	.	.	.	.	.	.	.	.	.	.	.	.	.	.	.	.	.	.	.	.	.	.	.	.	.	.	.	.	.	.	.	gi|2582879788|emb|OY740744.1|;87.455;837;74;24;1;811;8864434;8865265;0;935;Fringilla coelebs genome assembly, chromosome: 20
NonamEVm012014t1	NonamEVm012014	FIS1_BOVIN^FIS1_BOVIN^Q:18-461,H:1-151^47%ID^E:1.95e-40^RecName: Full=Mitochondrial fission 1 protein;^Eukaryota; Metazoa; Chordata; Craniata; Vertebrata; Euteleostomi; Mammalia; Eutheria; Laurasiatheria; Artiodactyla; Ruminantia; Pecora; Bovidae; Bovinae; Bos	.	NonamEVm012014t1.p1	2-532[+]	.	XP_036261887.1^XP_036261887.1^Q:18-464,H:1-149^86.6%ID^E:2.04e-79^.^.	.	.	.	.	.	KEGG:bta:615565	GO:0005741^cellular_component^mitochondrial outer membrane`GO:0005778^cellular_component^peroxisomal membrane`GO:0005777^cellular_component^peroxisome`GO:0000266^biological_process^mitochondrial fission`GO:0043653^biological_process^mitochondrial fragmentation involved in apoptotic process`GO:0008053^biological_process^mitochondrial fusion`GO:0016559^biological_process^peroxisome fission`GO:00901…	.	.	.	.	.	.	.	.	.	.	.	.	.	.	.	.	.	.	.	.	.	.	.	.	gi|2586266890|ref|XM_059837715.1|;89.916;476;47;1;4;479;19;493;3.56e-170;612;PREDICTED: Haemorhous mexicanus fission, mitochondrial 1 (FIS1), transcript variant X2, mRNA
NonamEVm012046t1	NonamEVm012046	CABP8_HUMAN^CABP8_HUMAN^Q:174-296,H:41-81^100%ID^E:8.83e-17^RecName: Full=Calcium-binding protein 8;^Eukaryota; Metazoa; Chordata; Craniata; Vertebrata; Euteleostomi; Mammalia; Eutheria; Euarchontoglires; Primates; Haplorrhini; Catarrhini; Hominidae; Homo	.	NonamEVm012046t1.p1	2941-3471[+]	.	NWX26535.1^NWX26535.1^Q:3076-3309,H:354-449^60.4%ID^E:1.02e-19^.^.	NWX26535.1^NWX26535.1^Q:46-123,H:354-449^60.4%ID^E:2.83e-23^.^.	.	.	.	.	KEGG:hsa:83698	GO:0048471^cellular_component^perinuclear region of cytoplasm`GO:0005886^cellular_component^plasma membrane`GO:0032588^cellular_component^trans-Golgi network membrane`GO:0005509^molecular_function^calcium ion binding	.	.	.	.	.	.	.	.	.	.	.	.	.	.	.	.	.	.	.	.	.	.	.	.	gi|2582879788|emb|OY740744.1|;91.748;1224;75;15;2091;3295;10455861;10454645;0;1677;Fringilla coelebs genome assembly, chromosome: 20
NonamEVm012101t1	NonamEVm012101	.	.	NonamEVm012101t1.p1	10-534[+]	.	.	.	.	.	.	.	.	.	.	.	.	.	.	.	.	.	.	.	.	.	.	.	.	.	.	.	.	.	.	.	.	.	.
NonamEVm012252t1	NonamEVm012252	.	.	NonamEVm012252t1.p1	999-1514[+]	.	.	.	.	.	.	.	.	.	.	.	.	.	.	.	.	.	.	.	.	.	.	.	.	.	.	.	.	.	.	.	.	.	gi|1772564241|ref|XM_021533208.2|;94.923;1891;37;27;1;1852;2723;4593;0;2905;PREDICTED: Lonchura striata domestica polypeptide N-acetylgalactosaminyltransferase 17 (GALNT17), mRNA
NonamEVm012252t2	NonamEVm012252	.	.	NonamEVm012252t2.p1	10-504[+]	.	.	.	.	sigP:1^34^0.573076	.	.	.	.	.	.	.	.	.	.	.	.	.	.	.	.	.	.	.	.	.	.	.	.	.	.	.	.	gi|2451486452|ref|XM_053995480.1|;93.407;455;18;6;119;564;3369;3820;0;664;PREDICTED: Vidua macroura polypeptide N-acetylgalactosaminyltransferase 17 (GALNT17), transcript variant X2, mRNA
NonamEVm012252t3	NonamEVm012252	.	.	NonamEVm012252t3.p1	10-525[+]	.	.	.	.	.	.	.	.	.	.	.	.	.	.	.	.	.	.	.	.	.	.	.	.	.	.	.	.	.	.	.	.	.	gi|2451486452|ref|XM_053995480.1|;93.407;455;21;5;137;585;3369;3820;0;665;PREDICTED: Vidua macroura polypeptide N-acetylgalactosaminyltransferase 17 (GALNT17), transcript variant X2, mRNA
NonamEVm012300t1	NonamEVm012300	.	.	NonamEVm012300t1.p1	2-514[+]	.	.	.	.	.	.	.	.	.	.	.	.	.	.	.	.	.	.	.	.	.	.	.	.	.	.	.	.	.	.	.	.	.	gi|2582879776|emb|OY740739.1|;87;300;30;6;939;1236;18492251;18492543;9.43e-85;329;Fringilla coelebs genome assembly, chromosome: 15
NonamEVm012302t1	NonamEVm012302	.	.	NonamEVm012302t1.p1	10-522[+]	.	KAF2987836.1^KAF2987836.1^Q:726-1211,H:68-194^52.5%ID^E:4.99e-44^.^.	KAI1231981.1^KAI1231981.1^Q:23-141,H:1551-1670^72%ID^E:4.31e-44^.^.	.	.	.	.	.	.	.	.	.	.	.	.	.	.	.	.	.	.	.	.	.	.	.	.	.	.	.	.	.	.	gi|1210004222|ref|XM_021540375.1|;95.681;1343;42;7;1;1341;4931;6259;0;2145;PREDICTED: Lonchura striata domestica bromodomain adjacent to zinc finger domain 1B (BAZ1B), mRNA
NonamEVm012450t1	NonamEVm012450	.	.	NonamEVm012450t1.p1	10-513[+]	.	.	.	.	.	.	.	.	.	.	.	.	.	.	.	.	.	.	.	.	.	.	.	.	.	.	.	.	.	.	.	.	.	gi|1772564095|ref|XM_021540379.2|;93.642;692;33;5;1;687;4274;4959;0;1024;PREDICTED: Lonchura striata domestica huntingtin interacting protein 1 (HIP1), transcript variant X2, mRNA
NonamEVm012580t1	NonamEVm012580	.	.	NonamEVm012580t1.p1	3-500[+]	.	.	.	.	.	.	.	.	.	.	.	.	.	.	.	.	.	.	.	.	.	.	.	.	.	.	.	.	.	.	.	.	.	gi|2582879788|emb|OY740744.1|;89.547;928;69;11;1;900;10676750;10677677;0;1151;Fringilla coelebs genome assembly, chromosome: 20
NonamEVm012608t1	NonamEVm012608	.	.	NonamEVm012608t1.p1	229-726[+]	.	.	.	.	.	.	.	.	.	.	.	.	.	.	.	.	.	.	.	.	.	.	.	.	.	.	.	.	.	.	.	.	.	gi|2582879788|emb|OY740744.1|;85.174;1720;142;41;779;2415;10478985;10477296;0;1659;Fringilla coelebs genome assembly, chromosome: 20
NonamEVm012615t1	NonamEVm012615	COKA1_MOUSE^COKA1_MOUSE^Q:1850-2347,H:170-332^31.1%ID^E:2.69e-07^RecName: Full=Collagen alpha-1(XX) chain;^Eukaryota; Metazoa; Chordata; Craniata; Vertebrata; Euteleostomi; Mammalia; Eutheria; Euarchontoglires; Glires; Rodentia; Myomorpha; Muroidea; Muridae; Murinae; Mus; Mus	.	NonamEVm012615t1.p1	1772-2269[+]	COKA1_MOUSE^COKA1_MOUSE^Q:27-163,H:170-303^34.1%ID^E:8.46e-09^RecName: Full=Collagen alpha-1(XX) chain;^Eukaryota; Metazoa; Chordata; Craniata; Vertebrata; Euteleostomi; Mammalia; Eutheria; Euarchontoglires; Glires; Rodentia; Myomorpha; Muroidea; Muridae; Murinae; Mus; Mus	XP_021386714.1^XP_021386714.1^Q:1772-3280,H:1-494^52.3%ID^E:8.95e-110^.^.	XP_021386714.1^XP_021386714.1^Q:1-165,H:1-162^86.7%ID^E:1.34e-71^.^.	PF00092.33^VWA^NULL^35-164^E:2.2e-18	sigP:1^20^0.9997789	.	.	KEGG:mmu:73368	GO:0005581^cellular_component^collagen trimer`GO:0062023^cellular_component^collagen-containing extracellular matrix`GO:0005576^cellular_component^extracellular region	GO:0005581^cellular_component^collagen trimer`GO:0062023^cellular_component^collagen-containing extracellular matrix`GO:0005576^cellular_component^extracellular region	.	52644.XP_010579415.1	3.82e-56	188.0	KOG3544@1|root,KOG3544@2759|Eukaryota,38E2D@33154|Opisthokonta,3BFRU@33208|Metazoa,3D3QE@33213|Bilateria,486NE@7711|Chordata,496UG@7742|Vertebrata,4GQI7@8782|Aves	33208|Metazoa	W	collagen	.	.	.	ko:K16628	ko04974,map04974	.	.	.	ko00000,ko00001	.	.	.	Collagen,Kunitz_BPTI,VWA,fn3	.	.	gi|1209986689|ref|XM_021531039.1|;96.244;1411;37;11;1733;3140;33;1430;0;2298;PREDICTED: Lonchura striata domestica collagen alpha-1(VII) chain (LOC110470951), mRNA
NonamEVm012801t1	NonamEVm012801	.	.	NonamEVm012801t1.p1	10-498[+]	.	.	.	.	.	.	.	.	.	.	.	.	.	.	.	.	.	.	.	.	.	.	.	.	.	.	.	.	.	.	.	.	.	gi|1756850360|ref|XM_005423839.2|;88.828;913;37;29;70;964;1916;2781;0;1061;PREDICTED: Geospiza fortis arrestin domain containing 1 (ARRDC1), mRNA
NonamEVm012801t2	NonamEVm012801	.	.	NonamEVm012801t2.p1	10-360[+]	.	.	.	.	.	.	.	.	.	.	.	.	.	.	.	.	.	.	.	.	.	.	.	.	.	.	.	.	.	.	.	.	.	gi|1756850360|ref|XM_005423839.2|;90;920;56;16;56;954;1875;2779;0;1157;PREDICTED: Geospiza fortis arrestin domain containing 1 (ARRDC1), mRNA
NonamEVm012843t1	NonamEVm012843	.	.	NonamEVm012843t1.p1	1-486[+]	.	.	.	.	.	TMRs:PredHel=1^Topology=i17-39o	.	.	.	.	.	.	.	.	.	.	.	.	.	.	.	.	.	.	.	.	.	.	.	.	.	.	.	gi|2621701169|emb|OY759691.1|;81.538;520;57;29;1;495;20866166;20866671;4.53e-104;392;Cinclus cinclus genome assembly, chromosome: 14
NonamEVm013006t1	NonamEVm013006	.	.	NonamEVm013006t1.p1	10-489[+]	.	XP_030921375.1^XP_030921375.1^Q:203-640,H:243-383^41.1%ID^E:7.91e-18^.^.	.	.	.	.	.	.	.	.	.	.	.	.	.	.	.	.	.	.	.	.	.	.	.	.	.	.	.	.	.	.	.	gi|2451498545|ref|XM_053998414.1|;88.338;686;42;11;246;913;1736;2401;0;789;PREDICTED: Vidua macroura kelch domain containing 8A (KLHDC8A), transcript variant X4, mRNA
NonamEVm013023t1	NonamEVm013023	.	.	NonamEVm013023t1.p1	10-489[+]	.	.	.	.	.	.	.	.	.	.	.	.	.	.	.	.	.	.	.	.	.	.	.	.	.	.	.	.	.	.	.	.	.	gi|2582879788|emb|OY740744.1|;86.083;1279;92;33;8;1226;10478548;10477296;0;1297;Fringilla coelebs genome assembly, chromosome: 20
NonamEVm013434t1	NonamEVm013434	.	.	NonamEVm013434t1.p1	3-464[+]	.	.	.	.	.	.	.	.	.	.	.	.	.	.	.	.	.	.	.	.	.	.	.	.	.	.	.	.	.	.	.	.	.	gi|2451412760|ref|XM_053969554.1|;84.359;390;23;18;241;595;1168;1554;1.21e-90;348;PREDICTED: Vidua macroura probable E3 ubiquitin-protein ligase DTX3 (LOC128802989), mRNA
NonamEVm013446t1	NonamEVm013446	.	.	NonamEVm013446t1.p1	373-834[+]	.	.	.	.	.	.	.	.	.	.	.	.	.	.	.	.	.	.	.	.	.	.	.	.	.	.	.	.	.	.	.	.	.	gi|2621701159|emb|OY759681.1|;86.105;439;44;10;1;425;65676641;65676206;2.79e-123;457;Cinclus cinclus genome assembly, chromosome: 4
NonamEVm013562t1	NonamEVm013562	.	.	NonamEVm013562t1.p1	2159-2617[+]	.	.	.	.	.	.	.	.	.	.	.	.	.	.	.	.	.	.	.	.	.	.	.	.	.	.	.	.	.	.	.	.	.	gi|2582879729|emb|OY740729.1|;83.643;1669;161;50;993;2626;1068331;1066740;0;1467;Fringilla coelebs genome assembly, chromosome: 5
NonamEVm013981t1	NonamEVm013981	.	.	NonamEVm013981t1.p1	10-453[+]	.	.	.	.	.	.	.	.	.	.	.	.	.	.	.	.	.	.	.	.	.	.	.	.	.	.	.	.	.	.	.	.	.	gi|2621701159|emb|OY759681.1|;84.929;2966;276;79;10;2899;65198302;65201172;0;2843;Cinclus cinclus genome assembly, chromosome: 4
NonamEVm014159t1	NonamEVm014159	.	.	NonamEVm014159t1.p1	1-438[+]	.	.	.	.	.	.	.	.	.	.	.	.	.	.	.	.	.	.	.	.	.	.	.	.	.	.	.	.	.	.	.	.	.	gi|929513406|ref|XM_014262423.1|;75.177;282;37;17;975;1241;1467;1730;3.9e-16;102;PREDICTED: Pseudopodoces humilis purine nucleoside phosphorylase (PNP), partial mRNA
NonamEVm014582t1	NonamEVm014582	.	.	NonamEVm014582t1.p1	10-432[+]	.	.	.	.	.	.	.	.	.	.	.	.	.	.	.	.	.	.	.	.	.	.	.	.	.	.	.	.	.	.	.	.	.	gi|2582879776|emb|OY740739.1|;87;300;30;6;240;537;18492251;18492543;3.94e-85;329;Fringilla coelebs genome assembly, chromosome: 15
NonamEVm014975t1	NonamEVm014975	.	.	NonamEVm014975t1.p1	10-423[+]	.	.	.	.	.	.	.	.	.	.	.	.	.	.	.	.	.	.	.	.	.	.	.	.	.	.	.	.	.	.	.	.	.	gi|1210014562|ref|XM_021545888.1|;95.418;1004;36;3;1;1001;2481;3477;0;1591;PREDICTED: Lonchura striata domestica KIAA0040 ortholog (KIAA0040), mRNA
NonamEVm015003t1	NonamEVm015003	ELN_CHICK^ELN_CHICK^Q:2231-1611,H:31-263^57.4%ID^E:2.67e-24^RecName: Full=Elastin;^Eukaryota; Metazoa; Chordata; Craniata; Vertebrata; Euteleostomi; Archelosauria; Archosauria; Dinosauria; Saurischia; Theropoda; Coelurosauria; Aves; Neognathae; Galloanserae; Galliformes; Phasianidae; Phasianinae; Gallus	.	NonamEVm015003t1.p1	644-1057[+]	.	TRZ17748.1^TRZ17748.1^Q:2233-1589,H:28-278^69.7%ID^E:9.59e-80^.^.	.	.	.	.	.	.	GO:0062023^cellular_component^collagen-containing extracellular matrix`GO:0005576^cellular_component^extracellular region`GO:0005201^molecular_function^extracellular matrix structural constituent	.	.	.	.	.	.	.	.	.	.	.	.	.	.	.	.	.	.	.	.	.	.	.	.	gi|2451459105|ref|XM_053961364.1|;95.281;551;26;0;1585;2135;863;313;0;874;PREDICTED: Vidua chalybeata elastin (ELN), transcript variant X7, mRNA
NonamEVm015082t1	NonamEVm015082	.	.	NonamEVm015082t1.p1	324-734[+]	.	.	.	.	.	.	.	.	.	.	.	.	.	.	.	.	.	.	.	.	.	.	.	.	.	.	.	.	.	.	.	.	.	.
NonamEVm015266t1	NonamEVm015266	.	.	NonamEVm015266t1.p1	1059-1466[+]	.	NWX26535.1^NWX26535.1^Q:2234-2031,H:354-421^80.9%ID^E:8.13e-27^.^.	.	.	.	.	.	.	.	.	.	.	.	.	.	.	.	.	.	.	.	.	.	.	.	.	.	.	.	.	.	.	.	gi|2621701177|emb|OY759699.1|;88.083;3281;271;79;1;3209;9328917;9332149;0;3783;Cinclus cinclus genome assembly, chromosome: 22
NonamEVm015987t1	NonamEVm015987	.	.	NonamEVm015987t1.p1	10-396[+]	.	.	.	.	.	.	.	.	.	.	.	.	.	.	.	.	.	.	.	.	.	.	.	.	.	.	.	.	.	.	.	.	.	gi|1491421865|ref|XM_014273634.2|;88.832;394;24;10;1;394;823;1196;2.07e-126;466;PREDICTED: Zonotrichia albicollis acid-sensing ion channel 1 (LOC106630013), mRNA
NonamEVm015994t1	NonamEVm015994	.	.	NonamEVm015994t1.p1	10-399[+]	.	.	.	.	.	.	.	.	.	.	.	.	.	.	.	.	.	.	.	.	.	.	.	.	.	.	.	.	.	.	.	.	.	gi|2451494949|ref|XM_053968030.1|;82.111;341;34;14;92;421;2834;3158;2.42e-66;267;PREDICTED: Vidua chalybeata cyclin-dependent kinase 16-like (LOC128801886), mRNA
NonamEVm016070t1	NonamEVm016070	.	.	NonamEVm016070t1.p1	10-399[+]	.	XP_005425188.1^XP_005425188.1^Q:499-642,H:222-269^97.9%ID^E:9.91e-19^.^.	.	.	.	.	.	.	.	.	.	.	.	.	.	.	.	.	.	.	.	.	.	.	.	.	.	.	.	.	.	.	.	gi|2582879788|emb|OY740744.1|;88.853;1238;108;18;1;1218;11079384;11080611;0;1495;Fringilla coelebs genome assembly, chromosome: 20
NonamEVm016184t1	NonamEVm016184	RT14_BOVIN^RT14_BOVIN^Q:50-406,H:10-128^84.9%ID^E:5.31e-67^RecName: Full=Small ribosomal subunit protein uS14m {ECO:0000305};^Eukaryota; Metazoa; Chordata; Craniata; Vertebrata; Euteleostomi; Mammalia; Eutheria; Laurasiatheria; Artiodactyla; Ruminantia; Pecora; Bovidae; Bovinae; Bos	.	NonamEVm016184t1.p1	23-409[+]	RT14_BOVIN^RT14_BOVIN^Q:10-128,H:10-128^84.9%ID^E:1.09e-68^RecName: Full=Small ribosomal subunit protein uS14m {ECO:0000305};^Eukaryota; Metazoa; Chordata; Craniata; Vertebrata; Euteleostomi; Mammalia; Eutheria; Laurasiatheria; Artiodactyla; Ruminantia; Pecora; Bovidae; Bovinae; Bos	NP_001232688.1^NP_001232688.1^Q:23-406,H:1-128^100%ID^E:3.01e-82^.^.	NP_001232688.1^NP_001232688.1^Q:1-128,H:1-128^100%ID^E:5.34e-84^.^.	PF00253.26^Ribosomal_S14^NULL^75-126^E:1.2e-22	.	.	.	KEGG:bta:445421	GO:0005743^cellular_component^mitochondrial inner membrane`GO:0005763^cellular_component^mitochondrial small ribosomal subunit`GO:0003735^molecular_function^structural constituent of ribosome`GO:0032543^biological_process^mitochondrial translation`GO:0006412^biological_process^translation	GO:0005743^cellular_component^mitochondrial inner membrane`GO:0005763^cellular_component^mitochondrial small ribosomal subunit`GO:0003735^molecular_function^structural constituent of ribosome`GO:0032543^biological_process^mitochondrial translation`GO:0006412^biological_process^translation	GO:0003735^molecular_function^structural constituent of ribosome`GO:0006412^biological_process^translation`GO:0005840^cellular_component^ribosome	181119.XP_005528769.1	2.13e-83	246.0	COG0199@1|root,KOG1741@2759|Eukaryota,3A1I2@33154|Opisthokonta,3BQCY@33208|Metazoa,3D76K@33213|Bilateria,48EPE@7711|Chordata,49BIJ@7742|Vertebrata,4GV5U@8782|Aves	33208|Metazoa	J	Ribosomal protein S14	MRPS14	GO:0000313,GO:0000314,GO:0003674,GO:0003735,GO:0005198,GO:0005575,GO:0005622,GO:0005623,GO:0005737,GO:0005739,GO:0005740,GO:0005743,GO:0005759,GO:0005761,GO:0005763,GO:0005840,GO:0006412,GO:0006414,GO:0006415,GO:0006518,GO:0006807,GO:0008150,GO:0008152,GO:0009058,GO:0009059,GO:0009987,GO:0010467,GO:0015935,GO:0016020,GO:0016043,GO:0019538,GO:0019866,GO:0022411,GO:0031090,GO:0031966,GO:0031967,GO:…	.	ko:K02954,ko:K19514	ko03010,ko04614,map03010,map04614	M00178,M00179	.	.	br01610,ko00000,ko00001,ko00002,ko03011	.	.	.	Ribosomal_S14	.	.	gi|402747133|ref|NM_001245759.2|;99.723;722;2;0;1;722;2;723;0;1323;Taeniopygia guttata mitochondrial ribosomal protein S14 (MRPS14), mRNA; nuclear gene for mitochondrial product
NonamEVm016184t2	NonamEVm016184	RT14_BOVIN^RT14_BOVIN^Q:48-404,H:10-128^84.9%ID^E:5.13e-67^RecName: Full=Small ribosomal subunit protein uS14m {ECO:0000305};^Eukaryota; Metazoa; Chordata; Craniata; Vertebrata; Euteleostomi; Mammalia; Eutheria; Laurasiatheria; Artiodactyla; Ruminantia; Pecora; Bovidae; Bovinae; Bos	.	NonamEVm016184t2.p1	21-407[+]	RT14_BOVIN^RT14_BOVIN^Q:10-128,H:10-128^84.9%ID^E:1.09e-68^RecName: Full=Small ribosomal subunit protein uS14m {ECO:0000305};^Eukaryota; Metazoa; Chordata; Craniata; Vertebrata; Euteleostomi; Mammalia; Eutheria; Laurasiatheria; Artiodactyla; Ruminantia; Pecora; Bovidae; Bovinae; Bos	NP_001232688.1^NP_001232688.1^Q:21-404,H:1-128^100%ID^E:2.9e-82^.^.	NP_001232688.1^NP_001232688.1^Q:1-128,H:1-128^100%ID^E:5.34e-84^.^.	PF00253.26^Ribosomal_S14^NULL^75-126^E:1.2e-22	.	.	.	KEGG:bta:445421	GO:0005743^cellular_component^mitochondrial inner membrane`GO:0005763^cellular_component^mitochondrial small ribosomal subunit`GO:0003735^molecular_function^structural constituent of ribosome`GO:0032543^biological_process^mitochondrial translation`GO:0006412^biological_process^translation	GO:0005743^cellular_component^mitochondrial inner membrane`GO:0005763^cellular_component^mitochondrial small ribosomal subunit`GO:0003735^molecular_function^structural constituent of ribosome`GO:0032543^biological_process^mitochondrial translation`GO:0006412^biological_process^translation	GO:0003735^molecular_function^structural constituent of ribosome`GO:0006412^biological_process^translation`GO:0005840^cellular_component^ribosome	181119.XP_005528769.1	2.13e-83	246.0	COG0199@1|root,KOG1741@2759|Eukaryota,3A1I2@33154|Opisthokonta,3BQCY@33208|Metazoa,3D76K@33213|Bilateria,48EPE@7711|Chordata,49BIJ@7742|Vertebrata,4GV5U@8782|Aves	33208|Metazoa	J	Ribosomal protein S14	MRPS14	GO:0000313,GO:0000314,GO:0003674,GO:0003735,GO:0005198,GO:0005575,GO:0005622,GO:0005623,GO:0005737,GO:0005739,GO:0005740,GO:0005743,GO:0005759,GO:0005761,GO:0005763,GO:0005840,GO:0006412,GO:0006414,GO:0006415,GO:0006518,GO:0006807,GO:0008150,GO:0008152,GO:0009058,GO:0009059,GO:0009987,GO:0010467,GO:0015935,GO:0016020,GO:0016043,GO:0019538,GO:0019866,GO:0022411,GO:0031090,GO:0031966,GO:0031967,GO:…	.	ko:K02954,ko:K19514	ko03010,ko04614,map03010,map04614	M00178,M00179	.	.	br01610,ko00000,ko00001,ko00002,ko03011	.	.	.	Ribosomal_S14	.	.	gi|402747133|ref|NM_001245759.2|;100;719;0;0;2;720;5;723;0;1328;Taeniopygia guttata mitochondrial ribosomal protein S14 (MRPS14), mRNA; nuclear gene for mitochondrial product
NonamEVm016199t1	NonamEVm016199	.	.	NonamEVm016199t1.p1	10-396[+]	.	.	.	.	.	.	.	.	.	.	.	.	.	.	.	.	.	.	.	.	.	.	.	.	.	.	.	.	.	.	.	.	.	gi|1772602534|ref|XM_021545776.2|;88.901;892;48;12;1;867;2759;3624;0;1051;PREDICTED: Lonchura striata domestica striatin interacting protein 2 (STRIP2), mRNA
NonamEVm016322t1	NonamEVm016322	PERE_HUMAN^PERE_HUMAN^Q:192-602,H:171-308^66.7%ID^E:2.15e-55^RecName: Full=Eosinophil peroxidase;^Eukaryota; Metazoa; Chordata; Craniata; Vertebrata; Euteleostomi; Mammalia; Eutheria; Euarchontoglires; Primates; Haplorrhini; Catarrhini; Hominidae; Homo	.	NonamEVm016322t1.p1	211-594[+]	.	XP_021396075.1^XP_021396075.1^Q:192-602,H:280-416^92%ID^E:2.24e-79^.^.	.	.	.	.	.	KEGG:hsa:8288	GO:0070062^cellular_component^extracellular exosome`GO:0005576^cellular_component^extracellular region`GO:0005615^cellular_component^extracellular space`GO:0034774^cellular_component^secretory granule lumen`GO:0020037^molecular_function^heme binding`GO:0140825^molecular_function^lactoperoxidase activity`GO:0046872^molecular_function^metal ion binding`GO:0004601^molecular_function^peroxidase activ…	.	.	.	.	.	.	.	.	.	.	.	.	.	.	.	.	.	.	.	.	.	.	.	.	gi|1210004264|ref|XM_021540400.1|;96.758;586;16;3;18;602;665;1248;0;974;PREDICTED: Lonchura striata domestica eosinophil peroxidase (LOC110475908), mRNA
NonamEVm016828t1	NonamEVm016828	.	.	NonamEVm016828t1.p1	10-384[+]	.	.	.	.	.	.	.	.	.	.	.	.	.	.	.	.	.	.	.	.	.	.	.	.	.	.	.	.	.	.	.	.	.	gi|2582879788|emb|OY740744.1|;92.558;645;41;4;1;643;10979661;10980300;0;918;Fringilla coelebs genome assembly, chromosome: 20
NonamEVm017025t1	NonamEVm017025	.	.	NonamEVm017025t1.p1	10-381[+]	.	KAF2980995.1^KAF2980995.1^Q:822-1199,H:84-209^90.5%ID^E:7.17e-73^.^.	.	.	.	.	.	.	.	.	.	.	.	.	.	.	.	.	.	.	.	.	.	.	.	.	.	.	.	.	.	.	.	gi|1210004246|ref|XM_021540389.1|;98.5;1200;17;1;1;1199;4406;5605;0;2115;PREDICTED: Lonchura striata domestica myotubularin related protein 4 (MTMR4), transcript variant X2, mRNA
NonamEVm017083t1	NonamEVm017083	.	.	NonamEVm017083t1.p1	1342-1713[+]	.	.	.	.	.	.	.	.	.	.	.	.	.	.	.	.	.	.	.	.	.	.	.	.	.	.	.	.	.	.	.	.	.	gi|2621701177|emb|OY759699.1|;83.318;3345;373;94;1;3255;10892883;10889634;0;2915;Cinclus cinclus genome assembly, chromosome: 22
NonamEVm017132t1	NonamEVm017132	.	.	NonamEVm017132t1.p1	2307-2675[+]	.	TRZ19089.1^TRZ19089.1^Q:2454-2624,H:35-85^59.6%ID^E:1.81e-07^.^.	TRZ19089.1^TRZ19089.1^Q:50-106,H:35-85^59.6%ID^E:6.74e-10^.^.	.	.	.	.	.	.	.	.	.	.	.	.	.	.	.	.	.	.	.	.	.	.	.	.	.	.	.	.	.	.	gi|2582879788|emb|OY740744.1|;91.906;5004;311;48;1;4965;9207758;9202810;0;6911;Fringilla coelebs genome assembly, chromosome: 20
NonamEVm017942t1	NonamEVm017942	KIF5A_MOUSE^KIF5A_MOUSE^Q:3-386,H:878-1027^56.7%ID^E:1.36e-33^RecName: Full=Kinesin heavy chain isoform 5A;^Eukaryota; Metazoa; Chordata; Craniata; Vertebrata; Euteleostomi; Mammalia; Eutheria; Euarchontoglires; Glires; Rodentia; Myomorpha; Muroidea; Muridae; Murinae; Mus; Mus	.	NonamEVm017942t1.p1	421-777[+]	.	XP_051627531.1^XP_051627531.1^Q:3-386,H:111-245^89.6%ID^E:1.36e-71^.^.	.	.	.	.	.	KEGG:mmu:16572	GO:0097440^cellular_component^apical dendrite`GO:0030424^cellular_component^axon`GO:1904115^cellular_component^axon cytoplasm`GO:0090724^cellular_component^central region of growth cone`GO:0035253^cellular_component^ciliary rootlet`GO:0005737^cellular_component^cytoplasm`GO:0030425^cellular_component^dendrite`GO:0032839^cellular_component^dendrite cytoplasm`GO:0005871^cellular_component^kinesin c…	.	.	.	.	.	.	.	.	.	.	.	.	.	.	.	.	.	.	.	.	.	.	.	.	gi|1799921248|ref|XM_032094075.1|;82.014;834;81;29;1;784;3328;4142;5.14e-180;645;PREDICTED: Corvus moneduloides kinesin family member 5A (KIF5A), mRNA
NonamEVm018287t3	NonamEVm018287	URM1_CHICK^URM1_CHICK^Q:10-114,H:1-35^97.1%ID^E:2.77e-16^RecName: Full=Ubiquitin-related modifier 1 {ECO:0000255|HAMAP-Rule:MF_03048};^Eukaryota; Metazoa; Chordata; Craniata; Vertebrata; Euteleostomi; Archelosauria; Archosauria; Dinosauria; Saurischia; Theropoda; Coelurosauria; Aves; Neognathae; Galloanserae; Galliformes; Phasianidae; Phasianinae; Gallus	.	NonamEVm018287t3.p1	3-353[+]	.	XP_005527273.1^XP_005527273.1^Q:10-114,H:1-35^100%ID^E:8.4e-15^.^.	.	.	.	.	.	KEGG:gga:417221	GO:0005829^cellular_component^cytosol`GO:0005634^cellular_component^nucleus`GO:0031386^molecular_function^protein tag activity`GO:0032447^biological_process^protein urmylation`GO:0034227^biological_process^tRNA thio-modification`GO:0002098^biological_process^tRNA wobble uridine modification	.	.	.	.	.	.	.	.	.	.	.	.	.	.	.	.	.	.	.	.	.	.	.	.	gi|2582879798|emb|OY740745.1|;91.935;248;18;2;116;362;6680660;6680414;2.55e-90;346;Fringilla coelebs genome assembly, chromosome: 21
NonamEVm018449t1	NonamEVm018449	.	.	NonamEVm018449t1.p1	608-958[+]	.	.	.	.	.	TMRs:PredHel=2^Topology=o40-62i75-97o	.	.	.	.	.	.	.	.	.	.	.	.	.	.	.	.	.	.	.	.	.	.	.	.	.	.	.	gi|2621701159|emb|OY759681.1|;88.912;1434;87;37;819;2221;65653997;65655389;0;1701;Cinclus cinclus genome assembly, chromosome: 4
NonamEVm018513t1	NonamEVm018513	.	.	NonamEVm018513t1.p1	10-357[+]	.	RLV88771.1^RLV88771.1^Q:2766-2954,H:9-75^77.6%ID^E:3.08e-20^.^.	.	.	.	.	.	.	.	.	.	.	.	.	.	.	.	.	.	.	.	.	.	.	.	.	.	.	.	.	.	.	.	gi|2582879729|emb|OY740729.1|;85.489;1013;91;29;1207;2190;960934;961919;0;1005;Fringilla coelebs genome assembly, chromosome: 5
NonamEVm018660t1	NonamEVm018660	CC124_HUMAN^CC124_HUMAN^Q:48-371,H:1-109^66.1%ID^E:1.13e-25^RecName: Full=Coiled-coil domain-containing protein 124 {ECO:0000305};^Eukaryota; Metazoa; Chordata; Craniata; Vertebrata; Euteleostomi; Mammalia; Eutheria; Euarchontoglires; Primates; Haplorrhini; Catarrhini; Hominidae; Homo	.	NonamEVm018660t1.p1	48-395[+]	CC124_HUMAN^CC124_HUMAN^Q:1-106,H:1-107^67.3%ID^E:1.98e-28^RecName: Full=Coiled-coil domain-containing protein 124 {ECO:0000305};^Eukaryota; Metazoa; Chordata; Craniata; Vertebrata; Euteleostomi; Mammalia; Eutheria; Euarchontoglires; Primates; Haplorrhini; Catarrhini; Hominidae; Homo	XP_021407445.1^XP_021407445.1^Q:48-380,H:1-111^99.1%ID^E:1.53e-44^.^.	XP_021407445.1^XP_021407445.1^Q:1-111,H:1-111^99.1%ID^E:5.17e-49^.^.	.	.	.	.	KEGG:hsa:115098	GO:0005813^cellular_component^centrosome`GO:0005829^cellular_component^cytosol`GO:0030496^cellular_component^midbody`GO:0005634^cellular_component^nucleus`GO:0005886^cellular_component^plasma membrane`GO:0003723^molecular_function^RNA binding`GO:0003713^molecular_function^transcription coactivator activity`GO:0007049^biological_process^cell cycle`GO:0051301^biological_process^cell division`GO:000…	GO:0005813^cellular_component^centrosome`GO:0005829^cellular_component^cytosol`GO:0030496^cellular_component^midbody`GO:0005634^cellular_component^nucleus`GO:0005886^cellular_component^plasma membrane`GO:0003723^molecular_function^RNA binding`GO:0003713^molecular_function^transcription coactivator activity`GO:0007049^biological_process^cell cycle`GO:0051301^biological_process^cell division`GO:000…	.	181119.XP_005531316.1	4.27e-48	160.0	KOG3223@1|root,KOG3223@2759|Eukaryota,38EMG@33154|Opisthokonta,3BEP0@33208|Metazoa,3CSSN@33213|Bilateria,48ABA@7711|Chordata,496ZK@7742|Vertebrata,4GIB1@8782|Aves	33208|Metazoa	S	Coiled-coil domain-containing protein 124	CCDC124	GO:0005575,GO:0005622,GO:0005623,GO:0005737,GO:0005829,GO:0005886,GO:0016020,GO:0044424,GO:0044444,GO:0044464,GO:0071944	.	.	.	.	.	.	.	.	.	.	Ccdc124	.	.	gi|2451476606|ref|XM_053966158.1|;86.99;784;53;12;1203;1954;1295;2061;0;837;PREDICTED: Vidua chalybeata coiled-coil domain containing 124 (CCDC124), transcript variant X2, mRNA
NonamEVm018927t1	NonamEVm018927	.	.	NonamEVm018927t1.p1	2-340[+]	.	.	.	.	.	TMRs:PredHel=1^Topology=o60-82i	.	.	.	.	.	.	.	.	.	.	.	.	.	.	.	.	.	.	.	.	.	.	.	.	.	.	.	gi|1993837042|ref|XM_039717697.1|;97.436;39;1;0;241;279;1;39;2.09e-06;67.6;PREDICTED: Passer montanus bromodomain containing 2 (BRD2), partial mRNA
NonamEVm019550t1	NonamEVm019550	CC124_MOUSE^CC124_MOUSE^Q:12-320,H:110-212^72.8%ID^E:2.99e-40^RecName: Full=Coiled-coil domain-containing protein 124;^Eukaryota; Metazoa; Chordata; Craniata; Vertebrata; Euteleostomi; Mammalia; Eutheria; Euarchontoglires; Glires; Rodentia; Myomorpha; Muroidea; Muridae; Murinae; Mus; Mus	.	NonamEVm019550t1.p1	3-338[+]	CC124_MOUSE^CC124_MOUSE^Q:4-106,H:110-212^72.8%ID^E:2.78e-45^RecName: Full=Coiled-coil domain-containing protein 124;^Eukaryota; Metazoa; Chordata; Craniata; Vertebrata; Euteleostomi; Mammalia; Eutheria; Euarchontoglires; Glires; Rodentia; Myomorpha; Muroidea; Muridae; Murinae; Mus; Mus	XP_021407445.1^XP_021407445.1^Q:3-335,H:109-219^96.4%ID^E:1.32e-56^.^.	XP_021407445.1^XP_021407445.1^Q:1-111,H:109-219^96.4%ID^E:9.61e-63^.^.	PF06244.17^Ccdc124^NULL^20-102^E:4.6e-34	.	.	.	KEGG:mmu:234388	GO:0005813^cellular_component^centrosome`GO:0005829^cellular_component^cytosol`GO:0030496^cellular_component^midbody`GO:0005634^cellular_component^nucleus`GO:0005886^cellular_component^plasma membrane`GO:0003713^molecular_function^transcription coactivator activity`GO:0007049^biological_process^cell cycle`GO:0051301^biological_process^cell division`GO:0006366^biological_process^transcription by R…	GO:0005813^cellular_component^centrosome`GO:0005829^cellular_component^cytosol`GO:0030496^cellular_component^midbody`GO:0005634^cellular_component^nucleus`GO:0005886^cellular_component^plasma membrane`GO:0003713^molecular_function^transcription coactivator activity`GO:0007049^biological_process^cell cycle`GO:0051301^biological_process^cell division`GO:0006366^biological_process^transcription by R…	.	181119.XP_005531316.1	2.56e-53	173.0	KOG3223@1|root,KOG3223@2759|Eukaryota,38EMG@33154|Opisthokonta,3BEP0@33208|Metazoa,3CSSN@33213|Bilateria,48ABA@7711|Chordata,496ZK@7742|Vertebrata,4GIB1@8782|Aves	33208|Metazoa	S	Coiled-coil domain-containing protein 124	CCDC124	GO:0005575,GO:0005622,GO:0005623,GO:0005737,GO:0005829,GO:0005886,GO:0016020,GO:0044424,GO:0044444,GO:0044464,GO:0071944	.	.	.	.	.	.	.	.	.	.	Ccdc124	.	.	gi|2451476606|ref|XM_053966158.1|;86.714;843;59;15;1037;1837;1235;2066;0;887;PREDICTED: Vidua chalybeata coiled-coil domain containing 124 (CCDC124), transcript variant X2, mRNA
NonamEVm019644t1	NonamEVm019644	.	.	NonamEVm019644t1.p1	2-334[+]	.	XP_023794805.1^XP_023794805.1^Q:370-251,H:245-295^54.9%ID^E:2.75e-06^.^.	.	.	.	.	.	.	.	.	.	.	.	.	.	.	.	.	.	.	.	.	.	.	.	.	.	.	.	.	.	.	.	gi|1772564160|ref|XM_031506434.1|;97.051;373;10;1;1;372;880;1252;8.43e-175;627;PREDICTED: Lonchura striata domestica abhydrolase domain containing 11 (ABHD11), transcript variant X3, mRNA
NonamEVm020325t1	NonamEVm020325	.	.	NonamEVm020325t1.p1	10-336[+]	.	PKK27408.1^PKK27408.1^Q:20-397,H:139-266^43.9%ID^E:4.8e-17^.^.	.	.	.	.	.	.	.	.	.	.	.	.	.	.	.	.	.	.	.	.	.	.	.	.	.	.	.	.	.	.	.	gi|1210014562|ref|XM_021545888.1|;95.6;1500;53;4;1;1499;2002;3489;0;2392;PREDICTED: Lonchura striata domestica KIAA0040 ortholog (KIAA0040), mRNA
NonamEVm020568t1	NonamEVm020568	.	.	NonamEVm020568t1.p1	10-333[+]	.	XP_021396062.1^XP_021396062.1^Q:78-578,H:662-828^73.7%ID^E:1.98e-73^.^.	NXR92099.1^NXR92099.1^Q:1-84,H:523-606^76.2%ID^E:2.08e-31^.^.	.	.	.	.	.	.	.	.	128390.XP_009463080.1	2.17e-30	120.0	KOG0800@1|root,KOG0800@2759|Eukaryota,38BAB@33154|Opisthokonta,3BFF8@33208|Metazoa,3CXS5@33213|Bilateria,487AQ@7711|Chordata,4933H@7742|Vertebrata,4GKBI@8782|Aves	33208|Metazoa	O	E3 ubiquitin-protein ligase RNF43	RNF43	GO:0001664,GO:0003674,GO:0003824,GO:0004842,GO:0005102,GO:0005109,GO:0005488,GO:0005515,GO:0005575,GO:0005622,GO:0005623,GO:0005634,GO:0005635,GO:0005737,GO:0005783,GO:0005789,GO:0005886,GO:0005887,GO:0006464,GO:0006508,GO:0006511,GO:0006807,GO:0008150,GO:0008152,GO:0008283,GO:0009056,GO:0009057,GO:0009966,GO:0009968,GO:0009987,GO:0010646,GO:0010648,GO:0012505,GO:0016020,GO:0016021,GO:0016567,GO:…	2.3.2.27	ko:K15694,ko:K16273	.	.	.	.	ko00000,ko01000,ko04121	.	.	.	zf-RING_2	.	.	gi|1210004242|ref|XM_021540387.1|;95.218;941;41;4;1;939;2345;3283;0;1485;PREDICTED: Lonchura striata domestica ring finger protein 43 (RNF43), mRNA
NonamEVm020709t1	NonamEVm020709	.	.	NonamEVm020709t1.p1	10-330[+]	.	.	.	.	.	.	.	.	.	.	.	.	.	.	.	.	.	.	.	.	.	.	.	.	.	.	.	.	.	.	.	.	.	gi|1772600635|ref|XM_031507146.1|;91.443;409;20;8;1;407;3366;3761;7.41e-151;547;PREDICTED: Lonchura striata domestica Janus kinase 3 (JAK3), mRNA
NonamEVm020770t1	NonamEVm020770	.	.	NonamEVm020770t1.p1	1378-1698[+]	.	XP_050825921.1^XP_050825921.1^Q:1740-2582,H:26-298^40.3%ID^E:2.9e-31^.^.	XP_050825921.1^XP_050825921.1^Q:23-73,H:2-42^54.9%ID^E:5.75e-06^.^.	.	.	.	.	.	.	.	.	.	.	.	.	.	.	.	.	.	.	.	.	.	.	.	.	.	.	.	.	.	.	gi|2032653611|ref|XM_041401064.1|;83.451;1849;176;56;1437;3208;4251;6046;0;1600;PREDICTED: Onychostruthus taczanowskii sodium/potassium/calcium exchanger 1-like (LOC121334161), transcript variant X4, mRNA
NonamEVm020942t1	NonamEVm020942	.	.	NonamEVm020942t1.p1	10-324[+]	.	.	.	.	.	.	.	.	.	.	.	.	.	.	.	.	.	.	.	.	.	.	.	.	.	.	.	.	.	.	.	.	.	gi|2621701177|emb|OY759699.1|;88.685;327;25;9;1;324;10889951;10889634;3.69e-103;388;Cinclus cinclus genome assembly, chromosome: 22
NonamEVm021261t1	NonamEVm021261	.	.	NonamEVm021261t1.p1	3-317[+]	.	.	.	.	.	TMRs:PredHel=1^Topology=i25-47o	.	.	.	.	.	.	.	.	.	.	.	.	.	.	.	.	.	.	.	.	.	.	.	.	.	.	.	gi|2043815338|ref|XM_041713212.1|;95.783;166;1;5;1;166;5500;5659;2.92e-65;263;PREDICTED: Taeniopygia guttata E3 ubiquitin-protein ligase HUWE1-like (LOC121468950), partial mRNA
NonamEVm021513t1	NonamEVm021513	COX14_DANRE^COX14_DANRE^Q:47-202,H:1-52^61.5%ID^E:2.52e-14^RecName: Full=Cytochrome c oxidase assembly protein COX14 homolog;^Eukaryota; Metazoa; Chordata; Craniata; Vertebrata; Euteleostomi; Actinopterygii; Neopterygii; Teleostei; Ostariophysi; Cypriniformes; Danionidae; Danioninae; Danio	.	NonamEVm021513t1.p1	1-312[+]	.	XP_050839705.1^XP_050839705.1^Q:26-202,H:3-61^94.9%ID^E:3.57e-30^.^.	.	.	.	.	.	KEGG:dre:568423	GO:0031966^cellular_component^mitochondrial membrane`GO:0033617^biological_process^mitochondrial cytochrome c oxidase assembly	.	.	.	.	.	.	.	.	.	.	.	.	.	.	.	.	.	.	.	.	.	.	.	.	gi|76155110|gb|DQ213681.1|;99.695;328;1;0;1;328;43;370;4.41e-167;601;Taeniopygia guttata clone 0061P0014C01 mRNA sequence
NonamEVm021531t1	NonamEVm021531	URM1_CHICK^URM1_CHICK^Q:10-114,H:1-35^97.1%ID^E:1.03e-13^RecName: Full=Ubiquitin-related modifier 1 {ECO:0000255|HAMAP-Rule:MF_03048};^Eukaryota; Metazoa; Chordata; Craniata; Vertebrata; Euteleostomi; Archelosauria; Archosauria; Dinosauria; Saurischia; Theropoda; Coelurosauria; Aves; Neognathae; Galloanserae; Galliformes; Phasianidae; Phasianinae; Gallus	.	NonamEVm021531t1.p1	973-1284[+]	.	XP_005527273.1^XP_005527273.1^Q:10-114,H:1-35^100%ID^E:4.47e-12^.^.	.	.	.	.	.	KEGG:gga:417221	GO:0005829^cellular_component^cytosol`GO:0005634^cellular_component^nucleus`GO:0031386^molecular_function^protein tag activity`GO:0032447^biological_process^protein urmylation`GO:0034227^biological_process^tRNA thio-modification`GO:0002098^biological_process^tRNA wobble uridine modification	.	.	.	.	.	.	.	.	.	.	.	.	.	.	.	.	.	.	.	.	.	.	.	.	gi|2082008589|emb|OU383790.1|;92.75;3655;182;50;116;3726;6198895;6202510;0;5204;Acrocephalus scirpaceus scirpaceus genome assembly, chromosome: 17
NonamEVm021875t1	NonamEVm021875	URM1_CHICK^URM1_CHICK^Q:10-138,H:1-45^84.4%ID^E:1.48e-15^RecName: Full=Ubiquitin-related modifier 1 {ECO:0000255|HAMAP-Rule:MF_03048};^Eukaryota; Metazoa; Chordata; Craniata; Vertebrata; Euteleostomi; Archelosauria; Archosauria; Dinosauria; Saurischia; Theropoda; Coelurosauria; Aves; Neognathae; Galloanserae; Galliformes; Phasianidae; Phasianinae; Gallus	.	NonamEVm021875t1.p1	1501-1809[+]	.	XP_005527273.1^XP_005527273.1^Q:10-138,H:1-45^86.7%ID^E:6.46e-14^.^.	.	.	.	.	.	KEGG:gga:417221	GO:0005829^cellular_component^cytosol`GO:0005634^cellular_component^nucleus`GO:0031386^molecular_function^protein tag activity`GO:0032447^biological_process^protein urmylation`GO:0034227^biological_process^tRNA thio-modification`GO:0002098^biological_process^tRNA wobble uridine modification	.	.	.	.	.	.	.	.	.	.	.	.	.	.	.	.	.	.	.	.	.	.	.	.	gi|2582879798|emb|OY740745.1|;92.311;2432;128;33;1804;4186;6682278;6679857;0;3400;Fringilla coelebs genome assembly, chromosome: 21
NonamEVm022227t1	NonamEVm022227	URM1_CHICK^URM1_CHICK^Q:10-138,H:1-45^84.4%ID^E:1.36e-17^RecName: Full=Ubiquitin-related modifier 1 {ECO:0000255|HAMAP-Rule:MF_03048};^Eukaryota; Metazoa; Chordata; Craniata; Vertebrata; Euteleostomi; Archelosauria; Archosauria; Dinosauria; Saurischia; Theropoda; Coelurosauria; Aves; Neognathae; Galloanserae; Galliformes; Phasianidae; Phasianinae; Gallus	.	NonamEVm022227t1.p1	234-539[+]	.	XP_005527273.1^XP_005527273.1^Q:10-138,H:1-45^86.7%ID^E:4.31e-16^.^.	.	.	.	.	.	KEGG:gga:417221	GO:0005829^cellular_component^cytosol`GO:0005634^cellular_component^nucleus`GO:0031386^molecular_function^protein tag activity`GO:0032447^biological_process^protein urmylation`GO:0034227^biological_process^tRNA thio-modification`GO:0002098^biological_process^tRNA wobble uridine modification	.	.	.	.	.	.	.	.	.	.	.	.	.	.	.	.	.	.	.	.	.	.	.	.	gi|2582879798|emb|OY740745.1|;91.255;526;26;11;40;548;6684183;6683661;0;699;Fringilla coelebs genome assembly, chromosome: 21
NonamEVm022554t1	NonamEVm022554	.	.	NonamEVm022554t1.p1	152-454[+]	.	.	.	.	.	TMRs:PredHel=1^Topology=o20-42i	.	.	.	.	.	.	.	.	.	.	.	.	.	.	.	.	.	.	.	.	.	.	.	.	.	.	.	gi|1772564241|ref|XM_021533208.2|;98.92;463;5;0;1;463;1832;2294;0;828;PREDICTED: Lonchura striata domestica polypeptide N-acetylgalactosaminyltransferase 17 (GALNT17), mRNA
NonamEVm022772t1	NonamEVm022772	.	.	NonamEVm022772t1.p1	1838-2140[+]	.	.	.	.	.	.	.	.	.	.	.	.	.	.	.	.	.	.	.	.	.	.	.	.	.	.	.	.	.	.	.	.	.	gi|2082008590|emb|OU383791.1|;88.5;1887;153;27;669;2514;2014406;2016269;0;2224;Acrocephalus scirpaceus scirpaceus genome assembly, chromosome: 18

## Sheet: species
Species
Taeniopygia guttata
Zonotrichia albicollis
Vidua macroura
Vidua chalybeata
Pseudopodoces humilis
Passer montanus
Onychostruthus taczanowskii
Motacilla alba alba
Lonchura striata domestica
Haemorhous mexicanus
Geospiza fortis
Corvus moneduloides
Catharus ustulatus
Camarhynchus parvulus
Ammospiza nelsoni
Ammospiza caudacuta
Fringilla coelebs
Cinclus cinclus
Acrocephalus scirpaceus scirpaceus
